# Supplementary material for: Identification of miRNAs Involving Potato-Phytophthora infestans Interaction
Source: MDPI journal article supplement (doi:10.3390/plants12030461), 2023-01-19
Supplement: s1 [file s1]

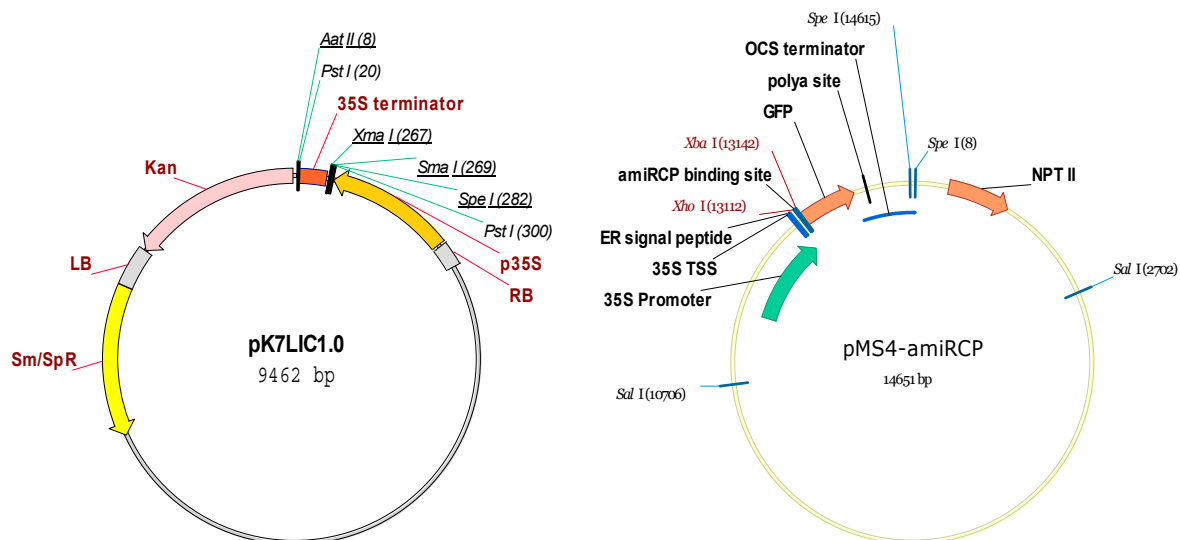

**Figure S1. Vector maps used in this study.**

Vector pK7LIC1.0 was derived from gateway vector pK7WGF2 (VIB- UGent Center for Plant Systems Biology ) replacing its LR recombination Unit and eGFP with a Ligation independent cloning sequences (LIC).

pMS4-amiRCP. The artificial miRNA (amiRCP) binding site is flanked by *Xho* I and *Xba* I restriction sites.
