# Supplementary material for: Identification of miRNAs Involving Potato-Phytophthora infestans Interaction
Source: Plants (Basel). 2023 Jan 19;12(3):461. doi: 10.3390/plants12030461 (PMC9921761; doi:10.3390/plants12030461)
Supplement: Supplementary file 1 [file plants-12-00461-s001.zip]

Archive with 6 entries (6 files):
- Figure S1 Vector map.pdf
- Table S1 Predicted miRNAs in potato.xlsx
- Table S2 Potato target genes by 171 potato miRNAs.xlsx
- Table S3 P. infestans target genes by 53 potato miRNAs.xlsx
- Table S4 Disease lesion phenotypes on leaves transient expressing miRNAs.xlsx
- Table S5 Primers used in this study.xlsx
