# Supplementary material for: Identification of miRNAs Involving Potato-Phytophthora infestans Interaction
Source: Plants (Basel). 2023 Jan 19;12(3):461. doi: 10.3390/plants12030461 (PMC9921761; doi:10.3390/plants12030461)
Supplement: Supplementary file 1 [file plants-12-00461-s001.zip › Table S1 Predicted miRNAs in potato.xlsx]

## Sheet: Sheet1
known	reads	24 h potato	36 h potato	48 h potato
miR10528	AATGCAATGTCATATACCATC	29.8993	25.3776	12.9261
miR156	TGACAGAAGAGAGTGAGCAC	0.918694	0.805637	0.320481
miR159	TTTGGATTGAAGGGAGCTCTA	980.33	482.818	185.345
miR166	TCGGACCAGGCTTCATTCCCC	927.213	624.369	230.533
miR171	TGATTGAGCCGTGCCAATATC	13.1958	4.99495	1.28192
miR1919	ACGAGAGTCATCTGTGACAGG	16.2859	22.4773	6.83693
stu-miR1919-5p	TGTCGCAGATGACTTTCGCCC	264.5	134.38	41.1284
miR394	TTGGCATTCTGTCCACCTCC	94.9596	29.6474	11.2168
miR396	TTCCACAGCTTTCTTGAACTG	226.416	115.609	47.2175
miR397b-3p	TCAACGCTGCACTCAATGATG	0.918694	0.563946	0.320481
miR398	TGTGTTCTCAGGTCGCCCCTG	2.42201	2.57804	0.427308
miR482	TCTTTCCTACTCCTCCCATACC	164.613	132.044	44.8673
miR5300	TCCCCAGTCCAGGCATTCCAAC	80.5945	45.4379	20.7244
stu-miR8039	TTTCCTATCTGAACTATCACC	1.58684	2.33635	1.49558
miR162b-3p	TCGATAAACCTCTGCATCCAG	378.669	248.7	67.7283
miR162b-5p	GGAGGCAGCGGTTCATCGATC	8.35176	4.51157	1.70923
miR166a-3p	TCGGACCAGGCTTCATTCCCC	67.0647	34.3201	18.3742
miR166b	TCGGACCAGGCTTCATTCCTC	6.76493	3.06142	1.06827
miR167b-3p	GATCATGTGGCAGCATCACC	2.33849	1.85296	0.427308
miR167d-3p	GATCATGTGGTTGCTTCACC	3.09015	3.46424	1.06827
miR171b-3p	TTGAGCCGCGTCAATATCTCT	2.42201	1.69184	0.640962
miR319-3p	TTGGACTGAAGGGTTCCCTTC	2.33849	8.05637	11.751
miR398b-3p	TTGTGTTCTCAGGTCACCCCT	3.00664	5.3172	0.961443
miR4376-5p	TACGCAGGAGAGATGATGCTG	64.7262	35.2869	14.5285
miR477b-5p	ACTCTCCCTCAAAGGCTTCTG	1.00221	0.725073	0.534135
miR482a-3p	TTTCCAATTCCACCCATTCCTA	148.661	74.1992	40.7011
miR482b-3p	TTACCGATTCCCCCCATTCCAA	15.1167	9.50651	3.31164
miR482d-3p	TCTTGCCTACACCGCCCATGCC	52.5326	41.9737	10.8964
miR482e-3p	TCTTGCCAATACCGCCCATTCC	124.107	99.8184	33.0095
miR530	TCTGCATTTGCACCTGCACCT	1.4198	0.241691	0
miR6024-3p	TTTTAGCAAGAGTTGTTTTCCC	48.6908	22.2356	10.2554
miR6025	TACCAACAATTGAGATAACATC	16.7035	8.62031	4.16625
miR6026-3p	TTCTTGGCTAGAGTTGTATTGC	35.662	28.6001	10.7895
miR6027	TGAATCCTTCGGCTATCCATAA	87.0254	40.1207	11.6441
miR6149-5p	TTGCAACACACCTGAATCGTC	175.972	121.973	56.5115
miR7122-3p	ACAGCGTTTCTCTGTATAACC	1.25276	0.322255	0.320481
miR8011a-3p	AATAAAAAGAAGCCTCACACAACT	0.835176	0.483382	0.106827
miR8016	ATTTTTGAATGGAAGGCCCATGTG	7.76714	1.61127	1.6024
miR8033-5p	TTCCAAAGCTGCAGAAATGAGT	1.58684	0.644509	0.320481
miR8036-3p	TATGTCTTTCCGATGCCTCCCA	68.568	50.03	17.306
miR8036-5p	GGAGGAATCGAAAGATATAAG	0.668141	0.161127	0.320481
miR8044-3p	TCTCCAGCGATATTTGAAACT	1.00221	0.8862	0.106827
miR8051-5p	TAGTATGGTAGAAAGATTCA	0.584623	0.402818	0.213654
novel1	AAAACGGGGTTGTGGGAGAGC	2.50553	6.28397	14.3148
novel2	AAAACTTAAAAACTCCGACGGG	0.751659	0.483382	0.320481
novel3	AAAAGTATGACGGAGGGTATCTGT	1.08573	0.402818	0
novel4	AAAAGTCGCAACTCTTTATAAAAG	2.42201	0.402818	0.640962
novel5	AAAATAATAAAAGTGTGCTCTCTC	1.00221	0.8862	0.640962
novel6	AAAATGATCTTTAGCGACAATTAA	0	0.805637	0.747789
novel7	AAAATTGAACAAGTAGACACAAGT	0.918694	0.644509	0.320481
novel8	AAAATTGAACAAGTAGACACATGC	0.668141	0.402818	0.320481
novel9	AAAATTGAACAAGTAGACACGTGT	1.58684	0.805637	0.854616
novel10	AAAATTGAACAAGTAGACATGTGC	0.668141	0	0.534135
novel11	AAAGACTGGATAGTTGAGTGACC	0.668141	0.725073	0
novel12	AAAGTTGCGACTTCAATGAAGAGT	1.00221	0.644509	0
novel13	AACATCTCCAGCCATATTTGA	1.08573	1.04733	0
novel14	AACGGATAAGATTGTGCCACGTGT	1.58684	1.20846	0.320481
novel15	AAGACGTCTGAATCTGAATAAGC	1.75387	2.90029	0.961443
novel16	AAGACGTCTGAATCTGAATGCAC	2.8396	3.30311	1.70923
novel17	AAGACGTGTTCAATTCGAATTGGA	2.58905	3.86706	2.35019
novel18	AAGACGTGTTCAATTTGAATTGGG	0	0.8862	0.534135
novel19	AAGCGCTGATACATTAATCTGATA	3.42422	1.04733	0.961443
novel20	AAGCGCTGATATATTAATCTGATG	1.08573	0.483382	0
novel21	AAGCTAGAGGTGTCAGAA	1.83739	1.20846	0.961443
novel22	AAGGTGTGTCTCTGAAATTTCGGT	1.33628	0.725073	0.854616
novel23	AAGGTGTGTCTCTGAGATTTCAGT	7.26603	6.36453	5.1277
novel24	AAGTGCTGATACATTAATCTGATG	1.75387	0.8862	0.320481
novel25	AAGTGTCAAAAATTGAATGGAGCC	1.16925	0.563946	0.534135
novel26	AAGTGTGTAGTTGAGAATTCGATT	0.584623	0.563946	0.854616
novel27	AATATGCAGACAACTTTAAGGGGC	2.17146	1.12789	0.747789
novel28	AATATTTATGATGTCCACGTGTGC	0.751659	0.805637	0.747789
novel29	AATATTTATGATGTCGACGTGGGC	0.751659	0.725073	0.640962
novel30	AATCCTTCAGCAATCCATA	9.18694	3.70593	1.28192
novel31	AATCTGTGAGATACATGTATCTGC	1.00221	1.53071	0.747789
novel32	AATGAAAATAAGGGAGGTAGACGT	0.835176	0.966764	0.854616
novel34	AATGCACATCTAGACACCTCAACT	0.668141	0.8862	0.640962
novel35	AATGTTCAGACGTGTATTCAGATT	4.92754	4.431	2.67067
novel36	AATTGAACAAGTAGACAGACGTGT	1.16925	1.04733	1.1751
novel37	AATTGTCATGTAGGACGTGTGTGT	1.00221	1.28902	0.320481
novel38	AATTTTGTCATTTAGAGCTGATA	0.501106	0	0.854616
novel39	ACCAAGGAGTCTGACATG	11.0243	6.84791	3.09798
novel41	ACGTGGCACTATCTTGTGGGCTCA	0.918694	0.402818	0
novel42	ACGTGTGCTACACAAATTTTGAGC	0	0.725073	0.534135
novel43	ACGTGTGTCTATTTGTTCAACTTT	0.835176	0.966764	1.1751
novel44	ACTAATAAAAACTGTGCTCTC	0.918694	0.644509	0
novel45	ACTATTGACAGCCTTAAAAACACT	0.835176	0.725073	0
novel46	ACTGACAGAAGAGAGTGAGC	9.01991	3.46424	1.38875
novel47	ACTGCACTTGACAACTATGGC	0.501106	0.563946	0.320481
novel48	AGAGTTGCGATTTTTATGAAAAGT	0.751659	0	0.534135
novel49	AGAGTTGCGATTTTTATGAAGAGT	0.835176	0.563946	0
novel50	AGATCCAATGTCGCTAAAGACTTT	0.501106	0.8862	0.747789
novel51	AGGACATAAACGTAAAATGAGGCC	0.835176	0.563946	0
novel52	AGGACGTGTGTGTCTACTTGTTCA	0.835176	0.483382	0
novel53	AGGACGTGTGTTTATTTGTTCAAC	0.501106	0.8862	1.28192
novel54	AGGATGCCACGTAGGACGTGTGTG	1.58684	0.644509	0.747789
novel55	AGGATGTCATGTAGGACGTGTGTG	0.751659	0.402818	0.747789
novel56	AGTAGATAAGATTATGACACGTGT	2.58905	1.36958	1.06827
novel57	AGTGGTCTCCTTATATGGACTTGG	0.751659	0.402818	0.427308
novel58	ATAAGTGTGTCTCTGGAATTTCGG	0.918694	1.61127	0.534135
novel59	ATAATGAGGACAACTTTGAGGGGC	0.835176	0.483382	0.427308
novel60	ATAATTCGTTACTCTGAGGCACGT	3.75829	2.17522	0.747789
novel61	ATACCGATTCGATCCGAGC	0	0.725073	0.427308
novel62	ATAGGACGTGTGTGTCTACTTGTT	2.00442	1.12789	0.640962
novel63	ATATAACGATCGATTTGGTGTGAT	0.668141	0.402818	0.747789
novel64	ATATCTCCGAACTATCGTAAATGG	2.25498	4.99495	4.59356
novel65	ATCCTCTGTCATACTTTTGGGAC	0	0.966764	0.747789
novel66	ATCCTTCGTCATACTTTTGGGACA	1.25276	0.966764	0.961443
novel67	ATCGAGACGTTGAGTGATGTATCC	1.67035	1.53071	0.747789
novel68	ATCGATGGATAAGATTATGACACG	0.751659	0.644509	0
novel69	ATCGGGACGTTGAGTGATGTATCC	1.08573	0.483382	0
novel70	ATCTAGTTATGTAGCTGACGTATT	0.584623	0.966764	0.640962
novel71	ATCTCAGATACATGTGAATCCACT	0.751659	0.483382	0
novel72	ATGACGTGACCGAATTATAATTGG	1.92091	2.33635	1.81606
novel73	ATGGTATCGTGAGATGGAATCAGT	0.751659	0.483382	0.320481
novel74	ATGGTCTCATGGCTGTCTGACAGAC	3.17367	1.93353	2.67067
novel75	ATGTCATGTAGGACACGTGTGTT	0.668141	0.563946	0.427308
novel76	ATGTCATTCCTTTCTATAAATAGT	0.668141	0.402818	0.427308
novel77	ATGTGTCTACTTGTTCAACTTTGT	2.17146	6.04228	3.63212
novel78	ATGTGTCTACTTGTTCAATTTTGT	0.918694	1.04733	0.854616
novel79	ATGTGTCTATTTGTTTAATTTTAT	0	0.644509	0.640962
novel80	ATTCAGGATTTTAAGATGACGGGT	5.26161	4.02818	3.20481
novel81	ATTCAGGATTTTGAGATGATGGGT	1.25276	0.563946	0.640962
novel82	ATTCTAACGCGGTGGTGACGTGGC	4.2594	3.06142	2.35019
novel83	ATTGACGGATAAGATTGTGCCACG	1.4198	0.483382	0.320481
novel84	ATTGGATTCAGTGTCGCTATAGGC	0.918694	0.725073	0.320481
novel85	ATTGTTGCTCATGGGATGGAG	1.25276	0.402818	0
novel86	ATTTAAAGGTTGTGGGTGCTCACT	1.25276	0.725073	0
novel87	ATTTAATACCCTATATCACTTGGC	2.25498	1.28902	0
novel88	ATTTTCATGGGGATTAGTATG	1.67035	1.53071	0.640962
novel89	ATTTTCCTTGGGATTAGTATG	1.25276	0.644509	0.427308
novel90	ATTTTGTGGGACTCTACAAGGCGT	0.668141	0.563946	0.427308
novel91	CATTGGACTCTGAATCCA	2.67256	1.69184	0.427308
novel92	CGTGTGTCTATTTGTTCAACTTT	0	0.402818	0.961443
novel93	CTTGGCCTGTAGTAGGTA	10.1056	13.293	5.98231
novel94	CTTTCTGAGGCAAAAGTGGATAGT	2.08794	2.25578	1.28192
novel95	GACGGATAAGATTATGACACGTGT	0.751659	0.402818	0.320481
novel96	GATGAACCTGGTTCTGATACC	1.00221	0.483382	0
novel97	GCATCCATGGCTGAATGG	1.08573	0.644509	0.534135
novel98	GCGTAGGCCTCCCAAAAGG	9.52101	8.05637	2.7775
novel99	GGGCTATTAGCTCAGTGG	1.33628	1.45015	0.640962
novel100	TAAGAGTTGTAGGTATACGAGT	1.00221	0	0
novel101	TAGCTCTGGTATTGTTGATATC	0.835176	1.7724	1.1751
novel102	TAGGTCTGAGATATATATTGC	1.00221	2.01409	0.320481
novel103	TATGAGATTTCTGTTGGGATT	2.25498	3.70593	2.7775
novel104	TATTATGCCATGTAGGACACGTGT	7.18252	4.431	2.56385
novel105	TATTGTAGTTGATTTGATGAG	0.751659	0.644509	0
novel106	TATTGTGGCATTGATGAGATC	0.918694	0.402818	0.320481
novel108	TCAACTATGACTTCTTTGCACAGA	0.751659	0.563946	0.320481
novel111	TCTAGTTGTTGCAATAATTCT	0.835176	1.45015	0.534135
novel114	TGATATTTGGAGTACTGAGGC	1.83739	2.6586	0
novel116	TGATTTGTATAATTCGTTAGATAC	0.417588	0.805637	0.961443
novel117	TGGACATCTGGTATCACATTATC	1.16925	1.36958	0.534135
novel118	TGGACCCTGATTATGAATAGGA	1.50332	0	0
novel120	TGTGGATGAATTGAAGGAGGG	4.00885	2.6586	1.06827
novel122	TTACGTGACACACTCCGTGACTCC	1.58684	0.644509	0.534135
novel123	TTAGGTCTGAATCTGAATGATTC	1.33628	2.41691	1.6024
novel124	TTAGTTAAGTTTAGATGTGTCTCT	1.25276	0.805637	0.427308
novel125	TTAGTTTAGTTAAGGCGTGTCTCT	1.33628	2.25578	0.961443
novel126	TTATTGTAGTTGATTTGATGA	0.501106	0.644509	0
novel127	TTCAGATGAGAACTTTGA	1.08573	0.725073	0.427308
novel128	TTCATTATGTCTCACTTTGAC	5.17809	2.98086	1.6024
novel130	TTGACTTGTAATACAAACTTATA	0	2.25578	1.28192
novel131	TTGAGCCGCGCCAATATCACG	3.17367	1.85296	0.747789
novel132	TTGCTTTGTTCTTTGTTCGAG	0.584623	0.8862	0
novel133	TTGGCAGCGATTTTTGTAGAAA	0.417588	0.805637	1.38875
novel135	TTGGTTGAGTGAGCATCTAAG	430.533	360.684	97.3194
novel136	TTTAACGTCGTCAGCTCCGTCAGT	0.751659	0.402818	0
novel137	TTTCATACCTGAACTATTGGG	1.08573	0	0
novel138	TTTCATCGTGATGGGGATA	69.4032	70.2515	42.3035
novel140	TTTCGATCACTGGTATGCCGG	2.75608	2.81973	1.70923
novel141	TTTCTGTTTGAGAAAAGGCTCATC	0	0.8862	0
