# Supplementary material for: Identification of miRNAs Involving Potato-Phytophthora infestans Interaction
Source: Plants (Basel). 2023 Jan 19;12(3):461. doi: 10.3390/plants12030461 (PMC9921761; doi:10.3390/plants12030461)
Supplement: Supplementary file 1 [file plants-12-00461-s001.zip › Table S2 Potato target genes by 171 potato miRNAs.xlsx]

## Sheet: potato targets  potato
NO.	reads	24hpotato	36hpotato	48hpotato	Score	target	DMG	annotation	classification
miR10528	AATGCAATGTCATATACCATC	29.8993	25.3776	12.9261	Score: 2.5	PGSC0003DMT400009953	PGSC0003DMG401003899	Phosphatidylinositol-4-phosphate 5-kinase	kinase
miR10529	AATGCAATGTCATATACCATC	29.8993	25.3776	12.9261	Score: 2.5	PGSC0003DMT400009955	PGSC0003DMG401003899	Phosphatidylinositol-4-phosphate 5-kinase	kinase
miR10530	AATGCAATGTCATATACCATC	29.8993	25.3776	12.9261	Score: 2.2	PGSC0003DMT400013077	PGSC0003DMG400005103	Proline iminopeptidase	other
miR10531	AATGCAATGTCATATACCATC	29.8993	25.3776	12.9261	Score: 2.5	PGSC0003DMT400045865	PGSC0003DMG400017792	Ce-LEA	other
miR10532	AATGCAATGTCATATACCATC	29.8993	25.3776	12.9261	Score: 2.5	PGSC0003DMT400085818	PGSC0003DMG400035389	ARO1 1	other
miR156	TGACAGAAGAGAGTGAGCAC	0.918694	0.805637	0.320481	Score: 2.5	PGSC0003DMT400030052	PGSC0003DMG400011531	Pre-mRNA splicing factor	other
miR156	TGACAGAAGAGAGTGAGCAC	0.918694	0.805637	0.320481	Score: 2.5	PGSC0003DMT400009115	PGSC0003DMG400003543	Serine-threonine protein kinase, plant-type	kinase
miR156	TGACAGAAGAGAGTGAGCAC	0.918694	0.805637	0.320481	Score: 2.5	PGSC0003DMT400032699	PGSC0003DMG400012555	Tobamovirus multiplication 1 homolog 2	R gene
miR156	TGACAGAAGAGAGTGAGCAC	0.918694	0.805637	0.320481	Score: 2.5	PGSC0003DMT400032700	PGSC0003DMG400012555	Tobamovirus multiplication 1 homolog 2	R gene
miR156	TGACAGAAGAGAGTGAGCAC	0.918694	0.805637	0.320481	Score: 2.5	PGSC0003DMT400020334	PGSC0003DMG400007862	SRF3	Transcription factor
miR156	TGACAGAAGAGAGTGAGCAC	0.918694	0.805637	0.320481	Score: 2.0	PGSC0003DMT400069873	PGSC0003DMG400027171	Conserved gene of unknown function	unknown
miR156	TGACAGAAGAGAGTGAGCAC	0.918694	0.805637	0.320481	Score: 1.0	PGSC0003DMT400059813	PGSC0003DMG400023260	LIGULELESS1 protein	growth
miR156	TGACAGAAGAGAGTGAGCAC	0.918694	0.805637	0.320481	Score: 1.5	PGSC0003DMT400063045	PGSC0003DMG400024527	LIGULELESS1 protein	growth
miR156	TGACAGAAGAGAGTGAGCAC	0.918694	0.805637	0.320481	Score: 1.5	PGSC0003DMT400063046	PGSC0003DMG400024527	LIGULELESS1 protein	growth
miR156	TGACAGAAGAGAGTGAGCAC	0.918694	0.805637	0.320481	Score: 1.0	PGSC0003DMT400068752	PGSC0003DMG400026736	LIGULELESS1 protein	growth
miR156	TGACAGAAGAGAGTGAGCAC	0.918694	0.805637	0.320481	Score: 1.0	PGSC0003DMT400072745	PGSC0003DMG400028308	LIGULELESS1 protein	growth
miR156	TGACAGAAGAGAGTGAGCAC	0.918694	0.805637	0.320481	Score: 1.0	PGSC0003DMT400072746	PGSC0003DMG400028308	LIGULELESS1 protein	growth
miR156	TGACAGAAGAGAGTGAGCAC	0.918694	0.805637	0.320481	Score: 1.0	PGSC0003DMT400084734	PGSC0003DMG400034310	LIGULELESS1 protein	growth
miR156	TGACAGAAGAGAGTGAGCAC	0.918694	0.805637	0.320481	Score: 1.0	PGSC0003DMT400029750	PGSC0003DMG400011433	Promoter-binding protein SPL9	other
miR156	TGACAGAAGAGAGTGAGCAC	0.918694	0.805637	0.320481	Score: 1.0	PGSC0003DMT400029751	PGSC0003DMG400011433	Promoter-binding protein SPL9	other
miR156	TGACAGAAGAGAGTGAGCAC	0.918694	0.805637	0.320481	Score: 1.0	PGSC0003DMT400056372	PGSC0003DMG400021902	Squamosa promoter-binding protein	other
miR156	TGACAGAAGAGAGTGAGCAC	0.918694	0.805637	0.320481	Score: 1.0	PGSC0003DMT400056373	PGSC0003DMG400021902	Squamosa promoter-binding protein	other
miR156	TGACAGAAGAGAGTGAGCAC	0.918694	0.805637	0.320481	Score: 1.0	PGSC0003DMT400056374	PGSC0003DMG400021902	Squamosa promoter-binding protein	other
miR159	TTTGGATTGAAGGGAGCTCTA	980.33	482.818	185.345	Score: 2.5	PGSC0003DMT400062964	PGSC0003DMG400024502	AtPex14p	other
miR159	TTTGGATTGAAGGGAGCTCTA	980.33	482.818	185.345	Score: 2.5	PGSC0003DMT400067413	PGSC0003DMG402026202	Transferase, transferring glycosyl groups	other
miR159	TTTGGATTGAAGGGAGCTCTA	980.33	482.818	185.345	Score: 2.5	PGSC0003DMT400067414	PGSC0003DMG402026202	Transferase, transferring glycosyl groups	other
miR159	TTTGGATTGAAGGGAGCTCTA	980.33	482.818	185.345	Score: 2.5	PGSC0003DMT400067415	PGSC0003DMG402026202	Transferase, transferring glycosyl groups	other
miR159	TTTGGATTGAAGGGAGCTCTA	980.33	482.818	185.345	Score: 2.5	PGSC0003DMT400008875	PGSC0003DMG400003446	Undecaprenyl pyrophosphate synthetase	other
miR159	TTTGGATTGAAGGGAGCTCTA	980.33	482.818	185.345	Score: 2.5	PGSC0003DMT400045205	PGSC0003DMG400017536	Glycine-rich cell wall structural protein 1.8	cell wall and Membrane
miR159	TTTGGATTGAAGGGAGCTCTA	980.33	482.818	185.345	Score: 2.5	PGSC0003DMT400021598	PGSC0003DMG400008377	Protein kinase; Calcium-binding EF-hand	kinase
miR159	TTTGGATTGAAGGGAGCTCTA	980.33	482.818	185.345	Score: 2.5	PGSC0003DMT400013977	PGSC0003DMG400005479	1-aminocyclopropane-1-carboxylate synthase	other enzyme
miR159	TTTGGATTGAAGGGAGCTCTA	980.33	482.818	185.345	Score: 2.5	PGSC0003DMT400057620	PGSC0003DMG401022374	Disease resistance protein (TIR class)	R gene
miR159	TTTGGATTGAAGGGAGCTCTA	980.33	482.818	185.345	Score: 2.5	PGSC0003DMT400057621	PGSC0003DMG401022374	Disease resistance protein (TIR class)	R gene
miR159	TTTGGATTGAAGGGAGCTCTA	980.33	482.818	185.345	Score: 2.0	PGSC0003DMT400065568	PGSC0003DMG402025508	Casein kinase	kinase
miR159	TTTGGATTGAAGGGAGCTCTA	980.33	482.818	185.345	Score: 2.0	PGSC0003DMT400065569	PGSC0003DMG402025508	Casein kinase	kinase
miR159	TTTGGATTGAAGGGAGCTCTA	980.33	482.818	185.345	Score: 2.2	PGSC0003DMT400089589	PGSC0003DMG400039160	Autoinhibited calcium ATPase	other
miR159	TTTGGATTGAAGGGAGCTCTA	980.33	482.818	185.345	Score: 2.2	PGSC0003DMT400032271	PGSC0003DMG400012397	Conserved gene of unknown function	unknown
miR159	TTTGGATTGAAGGGAGCTCTA	980.33	482.818	185.345	Score: 2.2	PGSC0003DMT400039783	PGSC0003DMG400015376	Conserved gene of unknown function	unknown
miR159	TTTGGATTGAAGGGAGCTCTA	980.33	482.818	185.345	Score: 2.2	PGSC0003DMT400039784	PGSC0003DMG400015376	Conserved gene of unknown function	unknown
miR159	TTTGGATTGAAGGGAGCTCTA	980.33	482.818	185.345	Score: 2.2	PGSC0003DMT400039785	PGSC0003DMG400015376	Conserved gene of unknown function	unknown
miR159	TTTGGATTGAAGGGAGCTCTA	980.33	482.818	185.345	Score: 2.2	PGSC0003DMT400054811	PGSC0003DMG400021273	Conserved gene of unknown function	unknown
miR159	TTTGGATTGAAGGGAGCTCTA	980.33	482.818	185.345	Score: 2.2	PGSC0003DMT400051360	PGSC0003DMG400019949	Gene of unknown function	unknown
miR159	TTTGGATTGAAGGGAGCTCTA	980.33	482.818	185.345	Score: 1.8	PGSC0003DMT400066066	PGSC0003DMG400025720	Duo pollen 1	growth
miR159	TTTGGATTGAAGGGAGCTCTA	980.33	482.818	185.345	Score: 1.2	PGSC0003DMT400058425	PGSC0003DMG400022689	GAMyb-like1	Transcription factor
miR159	TTTGGATTGAAGGGAGCTCTA	980.33	482.818	185.345	Score: 1.2	PGSC0003DMT400058426	PGSC0003DMG400022689	GAMyb-like1	Transcription factor
miR159	TTTGGATTGAAGGGAGCTCTA	980.33	482.818	185.345	Score: 1.2	PGSC0003DMT400058427	PGSC0003DMG400022689	GAMyb-like1	Transcription factor
miR159	TTTGGATTGAAGGGAGCTCTA	980.33	482.818	185.345	Score: 1.5	PGSC0003DMT400015155	PGSC0003DMG400005918	GAMYB-like2	Transcription factor
miR159	TTTGGATTGAAGGGAGCTCTA	980.33	482.818	185.345	Score: 1.5	PGSC0003DMT400015156	PGSC0003DMG400005918	GAMYB-like2	Transcription factor
miR159	TTTGGATTGAAGGGAGCTCTA	980.33	482.818	185.345	Score: 1.2	PGSC0003DMT400070549	PGSC0003DMG400027418	GAMYB-like2	Transcription factor
miR159	TTTGGATTGAAGGGAGCTCTA	980.33	482.818	185.345	Score: 1.8	PGSC0003DMT400094520	PGSC0003DMG400044091	Gene of unknown function	unknown
miR166	TCGGACCAGGCTTCATTCCCC	927.213	624.369	230.533	Score: 1.8	PGSC0003DMT400074932	PGSC0003DMG401029143	Class III HD-Zip protein 8	Transcription factor
miR166	TCGGACCAGGCTTCATTCCCC	927.213	624.369	230.533	Score: 1.8	PGSC0003DMT400074934	PGSC0003DMG402029143	Class III HD-Zip protein 8	Transcription factor
miR166	TCGGACCAGGCTTCATTCCCC	927.213	624.369	230.533	Score: 1.8	PGSC0003DMT400030829	PGSC0003DMG400011810	PHAVOLUTA-like HD-ZIPIII protein	Transcription factor
miR166	TCGGACCAGGCTTCATTCCCC	927.213	624.369	230.533	Score: 1.8	PGSC0003DMT400054420	PGSC0003DMG400021125	PHAVOLUTA-like HD-ZIPIII protein	Transcription factor
miR166	TCGGACCAGGCTTCATTCCCC	927.213	624.369	230.533	Score: 1.8	PGSC0003DMT400054421	PGSC0003DMG400021125	PHAVOLUTA-like HD-ZIPIII protein	Transcription factor
miR166	TCGGACCAGGCTTCATTCCCC	927.213	624.369	230.533	Score: 1.8	PGSC0003DMT400054422	PGSC0003DMG400021125	PHAVOLUTA-like HD-ZIPIII protein	Transcription factor
miR166	TCGGACCAGGCTTCATTCCCC	927.213	624.369	230.533	Score: 1.8	PGSC0003DMT400054423	PGSC0003DMG400021125	PHAVOLUTA-like HD-ZIPIII protein	Transcription factor
miR166	TCGGACCAGGCTTCATTCCCC	927.213	624.369	230.533	Score: 1.2	PGSC0003DMT400006735	PGSC0003DMG400002616	DNA binding protein	other
miR166	TCGGACCAGGCTTCATTCCCC	927.213	624.369	230.533	Score: 1.8	PGSC0003DMT400020801	PGSC0003DMG401008054	DNA binding protein	other
miR166	TCGGACCAGGCTTCATTCCCC	927.213	624.369	230.533	Score: 1.2	PGSC0003DMT400068035	PGSC0003DMG400026460	DNA binding protein	other
miR166	TCGGACCAGGCTTCATTCCCC	927.213	624.369	230.533	Score: 1.2	PGSC0003DMT400068037	PGSC0003DMG400026460	DNA binding protein	other
miR166	TCGGACCAGGCTTCATTCCCC	927.213	624.369	230.533	Score: 1.2	PGSC0003DMT400068038	PGSC0003DMG400026460	DNA binding protein	other
miR166	TCGGACCAGGCTTCATTCCCC	927.213	624.369	230.533	Score: 1.2	PGSC0003DMT400068039	PGSC0003DMG400026460	DNA binding protein	other
miR171	TGATTGAGCCGTGCCAATATC	13.1958	4.99495	1.28192	Score: 0.5	PGSC0003DMT400012104	PGSC0003DMG400004752	Hairy meristem	growth
miR171	TGATTGAGCCGTGCCAATATC	13.1958	4.99495	1.28192	Score: 1.0	PGSC0003DMT400033037	PGSC0003DMG400012683	GRAS family transcription factor	Transcription factor
miR171	TGATTGAGCCGTGCCAATATC	13.1958	4.99495	1.28192	Score: 0.5	PGSC0003DMT400066799	PGSC0003DMG400025973	GRAS family transcription factor	Transcription factor
miR1919	ACGAGAGTCATCTGTGACAGG	16.2859	22.4773	6.83693	Score: 2.5	PGSC0003DMT400076602	PGSC0003DMG400029788	Farnesyl pyrophosphate synthase	other enzyme
miR1919	ACGAGAGTCATCTGTGACAGG	16.2859	22.4773	6.83693	Score: 2.0	PGSC0003DMT400001915	PGSC0003DMG400000727	EMB2219	other
miR1919	ACGAGAGTCATCTGTGACAGG	16.2859	22.4773	6.83693	Score: 2.0	PGSC0003DMT400001916	PGSC0003DMG400000727	EMB2219	other
miR394	TTGGCATTCTGTCCACCTCC	94.9596	29.6474	11.2168	Score: 2.5	PGSC0003DMT400050203	PGSC0003DMG400019494	Beta-fructofuranosidase	cell wall and Membrane
miR394	TTGGCATTCTGTCCACCTCC	94.9596	29.6474	11.2168	Score: 2.5	PGSC0003DMT400050204	PGSC0003DMG400019494	Beta-fructofuranosidase	cell wall and Membrane
miR394	TTGGCATTCTGTCCACCTCC	94.9596	29.6474	11.2168	Score: 2.5	PGSC0003DMT400050205	PGSC0003DMG400019494	Beta-fructofuranosidase	cell wall and Membrane
miR394	TTGGCATTCTGTCCACCTCC	94.9596	29.6474	11.2168	Score: 2.5	PGSC0003DMT400051813	PGSC0003DMG400020110	Auxin-induced in root cultures protein 12	hormone response
miR394	TTGGCATTCTGTCCACCTCC	94.9596	29.6474	11.2168	Score: 1.0	PGSC0003DMT400084722	PGSC0003DMG400034305	F-box family protein	Transcription factor
miR396	TTCCACAGCTTTCTTGAACTG	226.416	115.609	47.2175	Score: 2.5	PGSC0003DMT400015249	PGSC0003DMG400005950	Multicystatin	hormone response
miR396	TTCCACAGCTTTCTTGAACTG	226.416	115.609	47.2175	Score: 2.5	PGSC0003DMT400015249	PGSC0003DMG400005950	Multicystatin	hormone response
miR396	TTCCACAGCTTTCTTGAACTG	226.416	115.609	47.2175	Score: 2.5	PGSC0003DMT400015250	PGSC0003DMG400005950	Multicystatin	hormone response
miR396	TTCCACAGCTTTCTTGAACTG	226.416	115.609	47.2175	Score: 2.5	PGSC0003DMT400015251	PGSC0003DMG400005950	Multicystatin	hormone response
miR396	TTCCACAGCTTTCTTGAACTG	226.416	115.609	47.2175	Score: 2.5	PGSC0003DMT400015254	PGSC0003DMG400005950	Multicystatin	hormone response
miR396	TTCCACAGCTTTCTTGAACTG	226.416	115.609	47.2175	Score: 2.5	PGSC0003DMT400069145	PGSC0003DMG400026899	Multicystatin	hormone response
miR396	TTCCACAGCTTTCTTGAACTG	226.416	115.609	47.2175	Score: 2.5	PGSC0003DMT400069145	PGSC0003DMG400026899	Multicystatin	hormone response
miR396	TTCCACAGCTTTCTTGAACTG	226.416	115.609	47.2175	Score: 2.5	PGSC0003DMT400069145	PGSC0003DMG400026899	Multicystatin	hormone response
miR396	TTCCACAGCTTTCTTGAACTG	226.416	115.609	47.2175	Score: 2.5	PGSC0003DMT400069146	PGSC0003DMG400026899	Multicystatin	hormone response
miR396	TTCCACAGCTTTCTTGAACTG	226.416	115.609	47.2175	Score: 2.5	PGSC0003DMT400069146	PGSC0003DMG400026899	Multicystatin	hormone response
miR396	TTCCACAGCTTTCTTGAACTG	226.416	115.609	47.2175	Score: 2.5	PGSC0003DMT400006755	PGSC0003DMG400002622	Protein disulfide isomerase	other
miR396	TTCCACAGCTTTCTTGAACTG	226.416	115.609	47.2175	Score: 2.5	PGSC0003DMT400006756	PGSC0003DMG400002622	Protein disulfide isomerase	other
miR396	TTCCACAGCTTTCTTGAACTG	226.416	115.609	47.2175	Score: 2.5	PGSC0003DMT400030835	PGSC0003DMG401011813	Short-chain dehydrogenase	other
miR396	TTCCACAGCTTTCTTGAACTG	226.416	115.609	47.2175	Score: 2.5	PGSC0003DMT400069146	PGSC0003DMG400026899	Multicystatin	hormone response
miR396	TTCCACAGCTTTCTTGAACTG	226.416	115.609	47.2175	Score: 2.5	PGSC0003DMT400019872	PGSC0003DMG400007687	Centromere protein	growth
miR396	TTCCACAGCTTTCTTGAACTG	226.416	115.609	47.2175	Score: 2.5	PGSC0003DMT400040075	PGSC0003DMG400015503	Sugar transporter	transport related
miR396	TTCCACAGCTTTCTTGAACTG	226.416	115.609	47.2175	Score: 2.5	PGSC0003DMT400087429	PGSC0003DMG400037000	Gene of unknown function	unknown
miR396	TTCCACAGCTTTCTTGAACTG	226.416	115.609	47.2175	Score: 2.5	PGSC0003DMT400089401	PGSC0003DMG400038972	Conserved gene of unknown function	unknown
miR396	TTCCACAGCTTTCTTGAACTG	226.416	115.609	47.2175	Score: 2.0	PGSC0003DMT400019663	PGSC0003DMG402007600	A membrane-associated salt-inducible protein	stress induced
miR396	TTCCACAGCTTTCTTGAACTG	226.416	115.609	47.2175	Score: 2.0	PGSC0003DMT400019664	PGSC0003DMG402007600	A membrane-associated salt-inducible protein	stress induced
miR396	TTCCACAGCTTTCTTGAACTG	226.416	115.609	47.2175	Score: 2.0	PGSC0003DMT400029433	PGSC0003DMG400011316	MADS-box protein	Transcription factor
miR396	TTCCACAGCTTTCTTGAACTG	226.416	115.609	47.2175	Score: 2.2	PGSC0003DMT400046956	PGSC0003DMG400018239	GRIP and coiled-coil domain-containing protein	other
miR396	TTCCACAGCTTTCTTGAACTG	226.416	115.609	47.2175	Score: 2.2	PGSC0003DMT400052983	PGSC0003DMG400020558	Ubiquitin-activating enzyme E1	Ubiquitin
miR396	TTCCACAGCTTTCTTGAACTG	226.416	115.609	47.2175	Score: 1.8	PGSC0003DMT400049891	PGSC0003DMG401019388	DNA binding protein	other
miR396	TTCCACAGCTTTCTTGAACTG	226.416	115.609	47.2175	Score: 1.8	PGSC0003DMT400049895	PGSC0003DMG401019388	DNA binding protein	other
miR396	TTCCACAGCTTTCTTGAACTG	226.416	115.609	47.2175	Score: 1.8	PGSC0003DMT400049896	PGSC0003DMG401019388	DNA binding protein	other
miR396	TTCCACAGCTTTCTTGAACTG	226.416	115.609	47.2175	Score: 1.2	PGSC0003DMT400084792	PGSC0003DMG400034363	DNA binding protein	other
miR396	TTCCACAGCTTTCTTGAACTG	226.416	115.609	47.2175	Score: 1.2	PGSC0003DMT400016105	PGSC0003DMG400006296	Tospovirus resistance protein A	R gene
miR397b-3p	TCAACGCTGCACTCAATGATG	0.918694	0.563946	0.320481	Score: 2.5	PGSC0003DMT400049198	PGSC0003DMG400019123	Pectinesterase inhibitor	cell wall and Membrane
miR482	TCTTTCCTACTCCTCCCATACC	164.613	132.044	44.8673	Score: 2.5	PGSC0003DMT400009588	PGSC0003DMG400003740	Proteasome subunit alpha type	other
miR482	TCTTTCCTACTCCTCCCATACC	164.613	132.044	44.8673	Score: 2.5	PGSC0003DMT400030034	PGSC0003DMG400011525	EDNR2GH4 protein	other
miR482	TCTTTCCTACTCCTCCCATACC	164.613	132.044	44.8673	Score: 2.5	PGSC0003DMT400056337	PGSC0003DMG400021887	Bacterial spot disease resistance protein 4	R gene
miR482	TCTTTCCTACTCCTCCCATACC	164.613	132.044	44.8673	Score: 2.5	PGSC0003DMT400056338	PGSC0003DMG400021887	Bacterial spot disease resistance protein 4	R gene
miR482	TCTTTCCTACTCCTCCCATACC	164.613	132.044	44.8673	Score: 2.5	PGSC0003DMT400066799	PGSC0003DMG400025973	GRAS family transcription factor	Transcription factor
miR482	TCTTTCCTACTCCTCCCATACC	164.613	132.044	44.8673	Score: 2.0	PGSC0003DMT400077030	PGSC0003DMG401029961	NBS-coding resistance protein	NBS-LRR protein
miR482	TCTTTCCTACTCCTCCCATACC	164.613	132.044	44.8673	Score: 2.0	PGSC0003DMT400077035	PGSC0003DMG402029961	NBS-coding resistance protein	NBS-LRR protein
miR482	TCTTTCCTACTCCTCCCATACC	164.613	132.044	44.8673	Score: 2.0	PGSC0003DMT400077036	PGSC0003DMG402029961	NBS-coding resistance protein	NBS-LRR protein
miR482	TCTTTCCTACTCCTCCCATACC	164.613	132.044	44.8673	Score: 2.0	PGSC0003DMT400082501	PGSC0003DMG400032578	HJTR2GH1 protein	NBS-LRR protein
miR482	TCTTTCCTACTCCTCCCATACC	164.613	132.044	44.8673	Score: 2.0	PGSC0003DMT400043963	PGSC0003DMG400017062	Disease resistance protein RGA1	R gene
miR482	TCTTTCCTACTCCTCCCATACC	164.613	132.044	44.8673	Score: 2.0	PGSC0003DMT400077639	PGSC0003DMG400030207	Avr9/Cf-9 rapidly elicited protein 4	R gene
miR482	TCTTTCCTACTCCTCCCATACC	164.613	132.044	44.8673	Score: 2.0	PGSC0003DMT400077640	PGSC0003DMG400030207	Avr9/Cf-9 rapidly elicited protein 4	R gene
miR482	TCTTTCCTACTCCTCCCATACC	164.613	132.044	44.8673	Score: 2.0	PGSC0003DMT400085896	PGSC0003DMG400035467	Disease resistance protein RGA2	R gene
miR482	TCTTTCCTACTCCTCCCATACC	164.613	132.044	44.8673	Score: 1.5	PGSC0003DMT400051006	PGSC0003DMG400019803	NBS-LRR resistance protein	NBS-LRR protein
miR482	TCTTTCCTACTCCTCCCATACC	164.613	132.044	44.8673	Score: 1.5	PGSC0003DMT400062269	PGSC0003DMG400024229	Gene of unknown function	unknown
miR482	TCTTTCCTACTCCTCCCATACC	164.613	132.044	44.8673	Score: 1.5	PGSC0003DMT400019686	PGSC0003DMG400007608	Blight resistance protein RGA1	R gene
miR482	TCTTTCCTACTCCTCCCATACC	164.613	132.044	44.8673	Score: 1.5	PGSC0003DMT400022135	PGSC0003DMG400008588	Disease resistance protein RGA4	R gene
miR482	TCTTTCCTACTCCTCCCATACC	164.613	132.044	44.8673	Score: 1.5	PGSC0003DMT400024056	PGSC0003DMG401009305	Disease resistance protein RGA3	R gene
miR482	TCTTTCCTACTCCTCCCATACC	164.613	132.044	44.8673	Score: 1.5	PGSC0003DMT400024057	PGSC0003DMG401009305	Disease resistance protein RGA3	R gene
miR482	TCTTTCCTACTCCTCCCATACC	164.613	132.044	44.8673	Score: 1.5	PGSC0003DMT400024058	PGSC0003DMG401009305	Disease resistance protein RGA3	R gene
miR482	TCTTTCCTACTCCTCCCATACC	164.613	132.044	44.8673	Score: 1.5	PGSC0003DMT400024123	PGSC0003DMG400009324	Disease resistance protein RGA4	R gene
miR482	TCTTTCCTACTCCTCCCATACC	164.613	132.044	44.8673	Score: 1.5	PGSC0003DMT400043956	PGSC0003DMG400017060	Disease resistance protein RGA1	R gene
miR482	TCTTTCCTACTCCTCCCATACC	164.613	132.044	44.8673	Score: 1.5	PGSC0003DMT400046505	PGSC0003DMG400018050	Disease resistance protein RGA1	R gene
miR482	TCTTTCCTACTCCTCCCATACC	164.613	132.044	44.8673	Score: 1.5	PGSC0003DMT400050981	PGSC0003DMG400019799	Blight resistance protein SH10	R gene
miR482	TCTTTCCTACTCCTCCCATACC	164.613	132.044	44.8673	Score: 1.5	PGSC0003DMT400051008	PGSC0003DMG400019804	Disease resistance protein RGA2	R gene
miR482	TCTTTCCTACTCCTCCCATACC	164.613	132.044	44.8673	Score: 1.5	PGSC0003DMT400079272	PGSC0003DMG400030855	Disease resistance protein RGA1	R gene
miR482	TCTTTCCTACTCCTCCCATACC	164.613	132.044	44.8673	Score: 1.5	PGSC0003DMT400079342	PGSC0003DMG401030883	Late blight resistance protein Rpi-pta1	R gene
miR482	TCTTTCCTACTCCTCCCATACC	164.613	132.044	44.8673	Score: 1.5	PGSC0003DMT400079343	PGSC0003DMG402030883	Disease resistance protein RGA2	R gene
miR482	TCTTTCCTACTCCTCCCATACC	164.613	132.044	44.8673	Score: 1.5	PGSC0003DMT400079347	PGSC0003DMG402030883	Disease resistance protein RGA2	R gene
miR5300	TCCCCAGTCCAGGCATTCCAAC	80.5945	45.4379	20.7244	Score: 2.5	PGSC0003DMT400000910	PGSC0003DMG400000342	Grave disease carrier protein	other
miR5300	TCCCCAGTCCAGGCATTCCAAC	80.5945	45.4379	20.7244	Score: 2.5	PGSC0003DMT400000911	PGSC0003DMG400000342	Grave disease carrier protein	other
miR5300	TCCCCAGTCCAGGCATTCCAAC	80.5945	45.4379	20.7244	Score: 2.5	PGSC0003DMT400059360	PGSC0003DMG400023062	Disease resistance protein	R gene
miR5300	TCCCCAGTCCAGGCATTCCAAC	80.5945	45.4379	20.7244	Score: 2.5	PGSC0003DMT400059361	PGSC0003DMG400023062	Disease resistance protein	R gene
miR5300	TCCCCAGTCCAGGCATTCCAAC	80.5945	45.4379	20.7244	Score: 2.5	PGSC0003DMT400023687	PGSC0003DMG400009164	Conserved gene of unknown function	unknown
miR5300	TCCCCAGTCCAGGCATTCCAAC	80.5945	45.4379	20.7244	Score: 2.0	PGSC0003DMT400031082	PGSC0003DMG400011907	NBS-coding resistance gene analog	NBS-LRR protein
miR5300	TCCCCAGTCCAGGCATTCCAAC	80.5945	45.4379	20.7244	Score: 2.0	PGSC0003DMT400031076	PGSC0003DMG400011906	Tospovirus resistance protein D	R gene
novel1	AAAACGGGGTTGTGGGAGAGC	2.50553	6.28397	14.3148	Score: 2.2	PGSC0003DMT400025821	PGSC0003DMG400009974	Conserved gene of unknown function	unknown
novel1	AAAACGGGGTTGTGGGAGAGC	2.50553	6.28397	14.3148	Score: 2.2	PGSC0003DMT400025822	PGSC0003DMG400009974	Conserved gene of unknown function	unknown
novel1	AAAACGGGGTTGTGGGAGAGC	2.50553	6.28397	14.3148	Score: 2.2	PGSC0003DMT400060806	PGSC0003DMG400023647	Extensin	other
novel1	AAAACGGGGTTGTGGGAGAGC	2.50553	6.28397	14.3148	Score: 0.0	PGSC0003DMT400089450	PGSC0003DMG400039021	Conserved gene of unknown function	unknown
novel10	AAAATTGAACAAGTAGACATGTGC	0.668141	0	0.534135	Score: 2.5	PGSC0003DMT400020634	PGSC0003DMG400007993	Pheromone receptor	hormone response
novel10	AAAATTGAACAAGTAGACATGTGC	0.668141	0	0.534135	Score: 2.5	PGSC0003DMT400022462	PGSC0003DMG400008704	Gene of unknown function	unknown
novel100	TAAGAGTTGTAGGTATACGAGT	1.00221	0	0	Score: 1.8	PGSC0003DMT400041122	PGSC0003DMG400015918	Acyltransferase	other enzyme
novel100	TAAGAGTTGTAGGTATACGAGT	1.00221	0	0	Score: 1.8	PGSC0003DMT400094717	PGSC0003DMG400044288	Acyltransferase	other enzyme
novel101	TAGCTCTGGTATTGTTGATATC	0.835176	1.7724	1.1751	Score: 2.2	PGSC0003DMT400088034	PGSC0003DMG400037605	Carbonic anhydrase	growth
novel101	TAGCTCTGGTATTGTTGATATC	0.835176	1.7724	1.1751	Score: 1.2	PGSC0003DMT400075604	PGSC0003DMG400029403	Conserved gene of unknown function	unknown
novel102	TAGGTCTGAGATATATATTGC	1.00221	2.01409	0.320481	Score: 2.0	PGSC0003DMT400057067	PGSC0003DMG400022173	Conserved gene of unknown function	unknown
novel102	TAGGTCTGAGATATATATTGC	1.00221	2.01409	0.320481	Score: 2.2	PGSC0003DMT400014745	PGSC0003DMG400005747	Pentatricopeptide repeat-containing protein	growth
novel103	TATGAGATTTCTGTTGGGATT	2.25498	3.70593	2.7775	Score: 2.5	PGSC0003DMT400054270	PGSC0003DMG400021051	Hcr9-9D	R gene
novel103	TATGAGATTTCTGTTGGGATT	2.25498	3.70593	2.7775	Score: 2.0	PGSC0003DMT400096030	PGSC0003DMG400045601	Gag-pol polyprotein	other
novel103	TATGAGATTTCTGTTGGGATT	2.25498	3.70593	2.7775	Score: 2.2	PGSC0003DMT400028487	PGSC0003DMG400010966	Resistance gene analog NBS8	R gene
novel103	TATGAGATTTCTGTTGGGATT	2.25498	3.70593	2.7775	Score: 2.2	PGSC0003DMT400072461	PGSC0003DMG400028192	Conserved gene of unknown function	unknown
novel103	TATGAGATTTCTGTTGGGATT	2.25498	3.70593	2.7775	Score: 2.2	PGSC0003DMT400072464	PGSC0003DMG400028192	Conserved gene of unknown function	unknown
novel103	TATGAGATTTCTGTTGGGATT	2.25498	3.70593	2.7775	Score: 2.2	PGSC0003DMT400080442	PGSC0003DMG402031319	TMV resistance protein N	R gene
novel103	TATGAGATTTCTGTTGGGATT	2.25498	3.70593	2.7775	Score: 0.0	PGSC0003DMT400007482	PGSC0003DMG400002887	Serine/threonine-protein kinase bri1	kinase
novel103	TATGAGATTTCTGTTGGGATT	2.25498	3.70593	2.7775	Score: 0.0	PGSC0003DMT400007477	PGSC0003DMG400002885	Serine-threonine protein kinase, plant-type	kinase
novel103	TATGAGATTTCTGTTGGGATT	2.25498	3.70593	2.7775	Score: 0.5	PGSC0003DMT400007484	PGSC0003DMG401002888	Conserved gene of unknown function	unknown
novel103	TATGAGATTTCTGTTGGGATT	2.25498	3.70593	2.7775	Score: 0.5	PGSC0003DMT400007486	PGSC0003DMG401002888	Conserved gene of unknown function	unknown
novel103	TATGAGATTTCTGTTGGGATT	2.25498	3.70593	2.7775	Score: 0.2	PGSC0003DMT400039706	PGSC0003DMG400015347	Conserved gene of unknown function	unknown
novel103	TATGAGATTTCTGTTGGGATT	2.25498	3.70593	2.7775	Score: 1.0	PGSC0003DMT400039719	PGSC0003DMG400015351	Conserved gene of unknown function	unknown
novel103	TATGAGATTTCTGTTGGGATT	2.25498	3.70593	2.7775	Score: 1.0	PGSC0003DMT400088091	PGSC0003DMG400037662	Conserved gene of unknown function	unknown
novel103	TATGAGATTTCTGTTGGGATT	2.25498	3.70593	2.7775	Score: 0.5	PGSC0003DMT400007537	PGSC0003DMG400002910	Cf-2.1	R gene
novel103	TATGAGATTTCTGTTGGGATT	2.25498	3.70593	2.7775	Score: 1.0	PGSC0003DMT400007537	PGSC0003DMG400002910	Cf-2.1	R gene
novel103	TATGAGATTTCTGTTGGGATT	2.25498	3.70593	2.7775	Score: 0.0	PGSC0003DMT400007537	PGSC0003DMG400002910	Cf-2.1	R gene
novel103	TATGAGATTTCTGTTGGGATT	2.25498	3.70593	2.7775	Score: 0.0	PGSC0003DMT400017048	PGSC0003DMG400006655	Cf-2.1	R gene
novel103	TATGAGATTTCTGTTGGGATT	2.25498	3.70593	2.7775	Score: 1.0	PGSC0003DMT400017048	PGSC0003DMG400006655	Cf-2.1	R gene
novel103	TATGAGATTTCTGTTGGGATT	2.25498	3.70593	2.7775	Score: 1.0	PGSC0003DMT400007608	PGSC0003DMG400002937	Disease resistance protein	R gene
novel103	TATGAGATTTCTGTTGGGATT	2.25498	3.70593	2.7775	Score: 1.2	PGSC0003DMT400039714	PGSC0003DMG400015349	Disease resistance protein	R gene
novel103	TATGAGATTTCTGTTGGGATT	2.25498	3.70593	2.7775	Score: 0.0	PGSC0003DMT400046491	PGSC0003DMG400018045	Hcr9-OR2B	R gene
novel105	TATTGTAGTTGATTTGATGAG	0.751659	0.644509	0	Score: 2.5	PGSC0003DMT400023289	PGSC0003DMG400009021	Gibberellin 2-oxidase	hormone response
novel105	TATTGTAGTTGATTTGATGAG	0.751659	0.644509	0	Score: 2.5	PGSC0003DMT400023290	PGSC0003DMG400009021	Gibberellin 2-oxidase	hormone response
novel105	TATTGTAGTTGATTTGATGAG	0.751659	0.644509	0	Score: 2.5	PGSC0003DMT400001238	PGSC0003DMG400000468	Amino acid transporter	transport related
novel105	TATTGTAGTTGATTTGATGAG	0.751659	0.644509	0	Score: 2.5	PGSC0003DMT400024503	PGSC0003DMG400009474	WD-repeat protein	Transcription factor
novel105	TATTGTAGTTGATTTGATGAG	0.751659	0.644509	0	Score: 2.5	PGSC0003DMT400024506	PGSC0003DMG400009474	WD-repeat protein	Transcription factor
novel105	TATTGTAGTTGATTTGATGAG	0.751659	0.644509	0	Score: 2.0	PGSC0003DMT400052316	PGSC0003DMG401020303	Gene of unknown function	unknown
novel105	TATTGTAGTTGATTTGATGAG	0.751659	0.644509	0	Score: 1.2	PGSC0003DMT400005723	PGSC0003DMG400002239	EMB2733/ESP3 (EMBRYO DEFECTIVE 2733); ATP-dependent RNA helicase	other
novel106	TATTGTGGCATTGATGAGATC	0.918694	0.402818	0.320481	Score: 2.5	PGSC0003DMT400009603	PGSC0003DMG400003746	Transcription factor	Transcription factor
novel106	TATTGTGGCATTGATGAGATC	0.918694	0.402818	0.320481	Score: 2.5	PGSC0003DMT400009604	PGSC0003DMG400003746	Transcription factor	Transcription factor
novel106	TATTGTGGCATTGATGAGATC	0.918694	0.402818	0.320481	Score: 2.5	PGSC0003DMT400013821	PGSC0003DMG400005404	NAD(P)H:quinone oxidoreductase	secondary product
novel106	TATTGTGGCATTGATGAGATC	0.918694	0.402818	0.320481	Score: 2.0	PGSC0003DMT400094852	PGSC0003DMG400044423	NBS-LRR type disease resistance protein	NBS-LRR protein
novel106	TATTGTGGCATTGATGAGATC	0.918694	0.402818	0.320481	Score: 2.0	PGSC0003DMT400013831	PGSC0003DMG400005410	NAD(P)H:quinone oxidoreductase	secondary product
novel106	TATTGTGGCATTGATGAGATC	0.918694	0.402818	0.320481	Score: 2.2	PGSC0003DMT400009216	PGSC0003DMG400003576	Glycosyl hydrolase family 38 protein	cell wall and Membrane
novel106	TATTGTGGCATTGATGAGATC	0.918694	0.402818	0.320481	Score: 2.2	PGSC0003DMT400023575	PGSC0003DMG400009129	Ubiquitin ligase SINAT3	Ubiquitin
novel108	TCAACTATGACTTCTTTGCACAGA	0.751659	0.563946	0.320481	Score: 2.5	PGSC0003DMT400071187	PGSC0003DMG401027685	Uncharacterized CRM domain-containing protein, chloroplastic	other
novel108	TCAACTATGACTTCTTTGCACAGA	0.751659	0.563946	0.320481	Score: 2.5	PGSC0003DMT400071188	PGSC0003DMG401027685	Uncharacterized CRM domain-containing protein, chloroplastic	other
novel108	TCAACTATGACTTCTTTGCACAGA	0.751659	0.563946	0.320481	Score: 2.2	PGSC0003DMT400020545	PGSC0003DMG400007958	Subtilisin-like protease preproenzyme	stress induced
novel108	TCAACTATGACTTCTTTGCACAGA	0.751659	0.563946	0.320481	Score: 2.2	PGSC0003DMT400020546	PGSC0003DMG400007958	Subtilisin-like protease preproenzyme	stress induced
novel111	TCTAGTTGTTGCAATAATTCT	0.835176	1.45015	0.534135	Score: 2.5	PGSC0003DMT400058922	PGSC0003DMG400022891	Beta-ketoacyl-ACP synthase II	other
novel111	TCTAGTTGTTGCAATAATTCT	0.835176	1.45015	0.534135	Score: 2.5	PGSC0003DMT400058923	PGSC0003DMG400022891	Beta-ketoacyl-ACP synthase II	other
novel111	TCTAGTTGTTGCAATAATTCT	0.835176	1.45015	0.534135	Score: 2.5	PGSC0003DMT400009371	PGSC0003DMG400003643	Oligopeptide transporter OPT family	other
novel111	TCTAGTTGTTGCAATAATTCT	0.835176	1.45015	0.534135	Score: 2.5	PGSC0003DMT400009372	PGSC0003DMG400003643	Oligopeptide transporter OPT family	other
novel111	TCTAGTTGTTGCAATAATTCT	0.835176	1.45015	0.534135	Score: 2.5	PGSC0003DMT400009373	PGSC0003DMG400003643	Oligopeptide transporter OPT family	other
novel111	TCTAGTTGTTGCAATAATTCT	0.835176	1.45015	0.534135	Score: 2.5	PGSC0003DMT400015563	PGSC0003DMG400006075	CYP72A56	growth
novel111	TCTAGTTGTTGCAATAATTCT	0.835176	1.45015	0.534135	Score: 2.5	PGSC0003DMT400015565	PGSC0003DMG400006075	CYP72A56	growth
novel111	TCTAGTTGTTGCAATAATTCT	0.835176	1.45015	0.534135	Score: 2.5	PGSC0003DMT400044659	PGSC0003DMG400017325	CYP72A56	growth
novel111	TCTAGTTGTTGCAATAATTCT	0.835176	1.45015	0.534135	Score: 2.5	PGSC0003DMT400002127	PGSC0003DMG400000813	NBS-LRR resistance protein	NBS-LRR protein
novel111	TCTAGTTGTTGCAATAATTCT	0.835176	1.45015	0.534135	Score: 2.5	PGSC0003DMT400002128	PGSC0003DMG400000813	NBS-LRR resistance protein	NBS-LRR protein
novel111	TCTAGTTGTTGCAATAATTCT	0.835176	1.45015	0.534135	Score: 2.5	PGSC0003DMT400080429	PGSC0003DMG400031318	Tir-nbs-lrr resistance protein	NBS-LRR protein
novel111	TCTAGTTGTTGCAATAATTCT	0.835176	1.45015	0.534135	Score: 2.5	PGSC0003DMT400060369	PGSC0003DMG400023480	Acyltransferase 1	other enzyme
novel111	TCTAGTTGTTGCAATAATTCT	0.835176	1.45015	0.534135	Score: 2.5	PGSC0003DMT400002132	PGSC0003DMG400000816	Tospovirus resistance protein A	R gene
novel111	TCTAGTTGTTGCAATAATTCT	0.835176	1.45015	0.534135	Score: 2.5	PGSC0003DMT400002133	PGSC0003DMG400000816	Tospovirus resistance protein A	R gene
novel111	TCTAGTTGTTGCAATAATTCT	0.835176	1.45015	0.534135	Score: 2.5	PGSC0003DMT400002134	PGSC0003DMG400000816	Tospovirus resistance protein A	R gene
novel111	TCTAGTTGTTGCAATAATTCT	0.835176	1.45015	0.534135	Score: 2.5	PGSC0003DMT400092590	PGSC0003DMG400042161	Gene of unknown function	unknown
novel111	TCTAGTTGTTGCAATAATTCT	0.835176	1.45015	0.534135	Score: 2.5	PGSC0003DMT400096675	PGSC0003DMG400046246	Zinc finger family protein	Transcription factor
novel111	TCTAGTTGTTGCAATAATTCT	0.835176	1.45015	0.534135	Score: 2.5	PGSC0003DMT400037294	PGSC0003DMG400014391	Conserved gene of unknown function	unknown
novel111	TCTAGTTGTTGCAATAATTCT	0.835176	1.45015	0.534135	Score: 2.0	PGSC0003DMT400080929	PGSC0003DMG400031521	Tospovirus resistance protein B	R gene
novel111	TCTAGTTGTTGCAATAATTCT	0.835176	1.45015	0.534135	Score: 2.0	PGSC0003DMT400080930	PGSC0003DMG400031521	Tospovirus resistance protein B	R gene
novel111	TCTAGTTGTTGCAATAATTCT	0.835176	1.45015	0.534135	Score: 2.2	PGSC0003DMT400043723	PGSC0003DMG403016979	NL27	other
novel111	TCTAGTTGTTGCAATAATTCT	0.835176	1.45015	0.534135	Score: 2.2	PGSC0003DMT400043724	PGSC0003DMG403016979	NL27	other
novel111	TCTAGTTGTTGCAATAATTCT	0.835176	1.45015	0.534135	Score: 2.2	PGSC0003DMT400043725	PGSC0003DMG403016979	NL27	other
novel111	TCTAGTTGTTGCAATAATTCT	0.835176	1.45015	0.534135	Score: 2.2	PGSC0003DMT400043726	PGSC0003DMG403016979	NL27	other
novel111	TCTAGTTGTTGCAATAATTCT	0.835176	1.45015	0.534135	Score: 2.2	PGSC0003DMT400047416	PGSC0003DMG400018428	Bacterial spot disease resistance protein 4	R gene
novel111	TCTAGTTGTTGCAATAATTCT	0.835176	1.45015	0.534135	Score: 2.2	PGSC0003DMT400053418	PGSC0003DMG400020722	TMV resistance protein N	R gene
novel111	TCTAGTTGTTGCAATAATTCT	0.835176	1.45015	0.534135	Score: 2.2	PGSC0003DMT400053419	PGSC0003DMG400020722	TMV resistance protein N	R gene
novel111	TCTAGTTGTTGCAATAATTCT	0.835176	1.45015	0.534135	Score: 2.2	PGSC0003DMT400053420	PGSC0003DMG400020722	TMV resistance protein N	R gene
novel111	TCTAGTTGTTGCAATAATTCT	0.835176	1.45015	0.534135	Score: 0.0	PGSC0003DMT400024936	PGSC0003DMG400009635	Gene of unknown function	unknown
novel111	TCTAGTTGTTGCAATAATTCT	0.835176	1.45015	0.534135	Score: 0.0	PGSC0003DMT400024937	PGSC0003DMG400009635	Gene of unknown function	unknown
novel111	TCTAGTTGTTGCAATAATTCT	0.835176	1.45015	0.534135	Score: 0.0	PGSC0003DMT400024938	PGSC0003DMG400009635	Gene of unknown function	unknown
novel111	TCTAGTTGTTGCAATAATTCT	0.835176	1.45015	0.534135	Score: 0.8	PGSC0003DMT400024926	PGSC0003DMG400009633	N protein	other
novel111	TCTAGTTGTTGCAATAATTCT	0.835176	1.45015	0.534135	Score: 0.8	PGSC0003DMT400024927	PGSC0003DMG400009633	N protein	other
novel111	TCTAGTTGTTGCAATAATTCT	0.835176	1.45015	0.534135	Score: 0.8	PGSC0003DMT400024928	PGSC0003DMG400009633	N protein	other
novel111	TCTAGTTGTTGCAATAATTCT	0.835176	1.45015	0.534135	Score: 0.8	PGSC0003DMT400024929	PGSC0003DMG400009633	N protein	other
novel111	TCTAGTTGTTGCAATAATTCT	0.835176	1.45015	0.534135	Score: 0.2	PGSC0003DMT400043300	PGSC0003DMG400016808	N protein	other
novel111	TCTAGTTGTTGCAATAATTCT	0.835176	1.45015	0.534135	Score: 0.2	PGSC0003DMT400043301	PGSC0003DMG400016808	N protein	other
novel111	TCTAGTTGTTGCAATAATTCT	0.835176	1.45015	0.534135	Score: 1.0	PGSC0003DMT400059181	PGSC0003DMG400022989	N protein	other
novel111	TCTAGTTGTTGCAATAATTCT	0.835176	1.45015	0.534135	Score: 0.8	PGSC0003DMT400062194	PGSC0003DMG400024206	N protein	other
novel111	TCTAGTTGTTGCAATAATTCT	0.835176	1.45015	0.534135	Score: 0.8	PGSC0003DMT400062195	PGSC0003DMG400024206	N protein	other
novel111	TCTAGTTGTTGCAATAATTCT	0.835176	1.45015	0.534135	Score: 0.0	PGSC0003DMT400006234	PGSC0003DMG402002428	NL25	other
novel111	TCTAGTTGTTGCAATAATTCT	0.835176	1.45015	0.534135	Score: 0.0	PGSC0003DMT400083274	PGSC0003DMG400033159	NL25	other
novel111	TCTAGTTGTTGCAATAATTCT	0.835176	1.45015	0.534135	Score: 0.0	PGSC0003DMT400083277	PGSC0003DMG400033161	NL25	other
novel111	TCTAGTTGTTGCAATAATTCT	0.835176	1.45015	0.534135	Score: 1.2	PGSC0003DMT400035243	PGSC0003DMG400013543	NL27	other
novel111	TCTAGTTGTTGCAATAATTCT	0.835176	1.45015	0.534135	Score: 1.2	PGSC0003DMT400035244	PGSC0003DMG400013543	NL27	other
novel111	TCTAGTTGTTGCAATAATTCT	0.835176	1.45015	0.534135	Score: 1.2	PGSC0003DMT400035245	PGSC0003DMG400013543	NL27	other
novel111	TCTAGTTGTTGCAATAATTCT	0.835176	1.45015	0.534135	Score: 0.0	PGSC0003DMT400071795	PGSC0003DMG400027932	NL27	other
novel111	TCTAGTTGTTGCAATAATTCT	0.835176	1.45015	0.534135	Score: 0.8	PGSC0003DMT400006064	PGSC0003DMG400002357	Bacterial spot disease resistance protein 4	R gene
novel111	TCTAGTTGTTGCAATAATTCT	0.835176	1.45015	0.534135	Score: 1.2	PGSC0003DMT400006231	PGSC0003DMG400002427	Bacterial spot disease resistance protein 4	R gene
novel111	TCTAGTTGTTGCAATAATTCT	0.835176	1.45015	0.534135	Score: 1.2	PGSC0003DMT400006232	PGSC0003DMG400002427	Bacterial spot disease resistance protein 4	R gene
novel111	TCTAGTTGTTGCAATAATTCT	0.835176	1.45015	0.534135	Score: 0.8	PGSC0003DMT400025085	PGSC0003DMG400009686	Bacterial spot disease resistance protein 4	R gene
novel111	TCTAGTTGTTGCAATAATTCT	0.835176	1.45015	0.534135	Score: 1.0	PGSC0003DMT400043719	PGSC0003DMG402016979	Bacterial spot disease resistance protein 4	R gene
novel111	TCTAGTTGTTGCAATAATTCT	0.835176	1.45015	0.534135	Score: 1.8	PGSC0003DMT400043732	PGSC0003DMG402016981	Bacterial spot disease resistance protein 4	R gene
novel111	TCTAGTTGTTGCAATAATTCT	0.835176	1.45015	0.534135	Score: 1.2	PGSC0003DMT400056337	PGSC0003DMG400021887	Bacterial spot disease resistance protein 4	R gene
novel111	TCTAGTTGTTGCAATAATTCT	0.835176	1.45015	0.534135	Score: 1.2	PGSC0003DMT400056338	PGSC0003DMG400021887	Bacterial spot disease resistance protein 4	R gene
novel111	TCTAGTTGTTGCAATAATTCT	0.835176	1.45015	0.534135	Score: 1.2	PGSC0003DMT400077806	PGSC0003DMG400030267	Bacterial spot disease resistance protein 4	R gene
novel111	TCTAGTTGTTGCAATAATTCT	0.835176	1.45015	0.534135	Score: 1.2	PGSC0003DMT400077808	PGSC0003DMG400030267	Bacterial spot disease resistance protein 4	R gene
novel111	TCTAGTTGTTGCAATAATTCT	0.835176	1.45015	0.534135	Score: 1.2	PGSC0003DMT400083471	PGSC0003DMG400033334	Bacterial spot disease resistance protein 4	R gene
novel111	TCTAGTTGTTGCAATAATTCT	0.835176	1.45015	0.534135	Score: 1.2	PGSC0003DMT400083472	PGSC0003DMG400033334	Bacterial spot disease resistance protein 4	R gene
novel111	TCTAGTTGTTGCAATAATTCT	0.835176	1.45015	0.534135	Score: 1.2	PGSC0003DMT400083473	PGSC0003DMG400033334	Bacterial spot disease resistance protein 4	R gene
novel111	TCTAGTTGTTGCAATAATTCT	0.835176	1.45015	0.534135	Score: 1.2	PGSC0003DMT400002320	PGSC0003DMG400000888	Resistance gene	R gene
novel111	TCTAGTTGTTGCAATAATTCT	0.835176	1.45015	0.534135	Score: 0.8	PGSC0003DMT400006229	PGSC0003DMG400002426	Resistance gene	R gene
novel111	TCTAGTTGTTGCAATAATTCT	0.835176	1.45015	0.534135	Score: 1.2	PGSC0003DMT400040528	PGSC0003DMG400015681	Resistance gene	R gene
novel111	TCTAGTTGTTGCAATAATTCT	0.835176	1.45015	0.534135	Score: 0.0	PGSC0003DMT400040590	PGSC0003DMG400015693	Resistance gene	R gene
novel111	TCTAGTTGTTGCAATAATTCT	0.835176	1.45015	0.534135	Score: 1.2	PGSC0003DMT400043733	PGSC0003DMG403016981	Resistance gene	R gene
novel111	TCTAGTTGTTGCAATAATTCT	0.835176	1.45015	0.534135	Score: 1.2	PGSC0003DMT400047499	PGSC0003DMG400018461	Resistance gene	R gene
novel111	TCTAGTTGTTGCAATAATTCT	0.835176	1.45015	0.534135	Score: 0.5	PGSC0003DMT400058450	PGSC0003DMG400022699	Resistance gene	R gene
novel111	TCTAGTTGTTGCAATAATTCT	0.835176	1.45015	0.534135	Score: 1.2	PGSC0003DMT400078881	PGSC0003DMG401030700	Resistance gene	R gene
novel111	TCTAGTTGTTGCAATAATTCT	0.835176	1.45015	0.534135	Score: 0.8	PGSC0003DMT400077130	PGSC0003DMG402029995	TMV resistance protein N	R gene
novel111	TCTAGTTGTTGCAATAATTCT	0.835176	1.45015	0.534135	Score: 1.5	PGSC0003DMT400083276	PGSC0003DMG400033160	TMV resistance protein N	R gene
novel114	TGATATTTGGAGTACTGAGGC	1.83739	2.6586	0	Score: 2.5	PGSC0003DMT400049004	PGSC0003DMG402019042	Cytochrome P450 like_TBP	growth
novel114	TGATATTTGGAGTACTGAGGC	1.83739	2.6586	0	Score: 2.0	PGSC0003DMT400001124	PGSC0003DMG400000425	Flavonoid 3',5'-hydroxylase	secondary product
novel114	TGATATTTGGAGTACTGAGGC	1.83739	2.6586	0	Score: 2.0	PGSC0003DMT400001125	PGSC0003DMG400000425	Flavonoid 3',5'-hydroxylase	secondary product
novel116	TGATTTGTATAATTCGTTAGATAC	0.417588	0.805637	0.961443	Score: 2.2	PGSC0003DMT400061710	PGSC0003DMG400024016	ATP:citrate lyase	other
novel116	TGATTTGTATAATTCGTTAGATAC	0.417588	0.805637	0.961443	Score: 2.2	PGSC0003DMT400061711	PGSC0003DMG400024016	ATP:citrate lyase	other
novel120	TGTGGATGAATTGAAGGAGGG	4.00885	2.6586	1.06827	Score: 2.5	PGSC0003DMT400024646	PGSC0003DMG400009536	Transferase, transferring glycosyl groups	other
novel120	TGTGGATGAATTGAAGGAGGG	4.00885	2.6586	1.06827	Score: 2.5	PGSC0003DMT400005261	PGSC0003DMG400002071	Pentatricopeptide (PPR) repeat-containing protein	growth
novel120	TGTGGATGAATTGAAGGAGGG	4.00885	2.6586	1.06827	Score: 2.5	PGSC0003DMT400005262	PGSC0003DMG400002071	Pentatricopeptide (PPR) repeat-containing protein	growth
novel120	TGTGGATGAATTGAAGGAGGG	4.00885	2.6586	1.06827	Score: 2.5	PGSC0003DMT400005263	PGSC0003DMG400002071	Pentatricopeptide (PPR) repeat-containing protein	growth
novel120	TGTGGATGAATTGAAGGAGGG	4.00885	2.6586	1.06827	Score: 2.5	PGSC0003DMT400011891	PGSC0003DMG400004667	Rhg4-like receptor kinase II	kinase
novel120	TGTGGATGAATTGAAGGAGGG	4.00885	2.6586	1.06827	Score: 2.5	PGSC0003DMT400072918	PGSC0003DMG402028367	Gene of unknown function	unknown
novel120	TGTGGATGAATTGAAGGAGGG	4.00885	2.6586	1.06827	Score: 2.0	PGSC0003DMT400049580	PGSC0003DMG400019260	Conserved gene of unknown function	unknown
novel123	TTAGGTCTGAATCTGAATGATTC	1.33628	2.41691	1.6024	Score: 2.0	PGSC0003DMT400000336	PGSC0003DMG400000114	Phosphatidylinositol 3-and 4-kinase family protein	kinase
novel123	TTAGGTCTGAATCTGAATGATTC	1.33628	2.41691	1.6024	Score: 2.0	PGSC0003DMT400000337	PGSC0003DMG400000114	Phosphatidylinositol 3-and 4-kinase family protein	kinase
novel123	TTAGGTCTGAATCTGAATGATTC	1.33628	2.41691	1.6024	Score: 2.0	PGSC0003DMT400033081	PGSC0003DMG400012703	U4/U6 small nuclear ribonucleoprotein Prp4	Ubiquitin
novel125	TTAGTTTAGTTAAGGCGTGTCTCT	1.33628	2.25578	0.961443	Score: 2.5	PGSC0003DMT400037471	PGSC0003DMG400014458	Pollen-specific C2 domain containing protein	growth
novel126	TTATTGTAGTTGATTTGATGA	0.501106	0.644509	0	Score: 2.5	PGSC0003DMT400032758	PGSC0003DMG400012578	UDP-glucuronosyltransferase	cell wall and Membrane
novel126	TTATTGTAGTTGATTTGATGA	0.501106	0.644509	0	Score: 2.5	PGSC0003DMT400032759	PGSC0003DMG400012578	UDP-glucuronosyltransferase	cell wall and Membrane
novel126	TTATTGTAGTTGATTTGATGA	0.501106	0.644509	0	Score: 2.5	PGSC0003DMT400052316	PGSC0003DMG401020303	Gene of unknown function	unknown
novel126	TTATTGTAGTTGATTTGATGA	0.501106	0.644509	0	Score: 2.5	PGSC0003DMT400048464	PGSC0003DMG400018824	RBP50	R gene
novel126	TTATTGTAGTTGATTTGATGA	0.501106	0.644509	0	Score: 2.5	PGSC0003DMT400067142	PGSC0003DMG400026101	Heat shock protein 70 (HSP70)-interacting protein	stress induced
novel126	TTATTGTAGTTGATTTGATGA	0.501106	0.644509	0	Score: 2.5	PGSC0003DMT400067143	PGSC0003DMG400026101	Heat shock protein 70 (HSP70)-interacting protein	stress induced
novel126	TTATTGTAGTTGATTTGATGA	0.501106	0.644509	0	Score: 2.5	PGSC0003DMT400055554	PGSC0003DMG400021577	NAC domain protein	Transcription factor
novel126	TTATTGTAGTTGATTTGATGA	0.501106	0.644509	0	Score: 2.0	PGSC0003DMT400015435	PGSC0003DMG400006025	1-aminocyclopropane-1-carboxylic acid oxidase	other enzyme
novel126	TTATTGTAGTTGATTTGATGA	0.501106	0.644509	0	Score: 1.8	PGSC0003DMT400005723	PGSC0003DMG400002239	EMB2733/ESP3 (EMBRYO DEFECTIVE 2733); ATP-dependent RNA helicase	other
novel127	TTCAGATGAGAACTTTGA	1.08573	0.725073	0.427308	Score: 2.5	PGSC0003DMT400035780	PGSC0003DMG400013773	Integrase core domain containing protein	other
novel127	TTCAGATGAGAACTTTGA	1.08573	0.725073	0.427308	Score: 2.5	PGSC0003DMT400092383	PGSC0003DMG400041954	(Fragment)	other
novel127	TTCAGATGAGAACTTTGA	1.08573	0.725073	0.427308	Score: 2.5	PGSC0003DMT400024179	PGSC0003DMG400009345	Dnajc14 protein	other
novel127	TTCAGATGAGAACTTTGA	1.08573	0.725073	0.427308	Score: 2.5	PGSC0003DMT400028779	PGSC0003DMG400011078	ER glycerol-phosphate acyltransferase	other
novel127	TTCAGATGAGAACTTTGA	1.08573	0.725073	0.427308	Score: 2.5	PGSC0003DMT400028780	PGSC0003DMG400011078	ER glycerol-phosphate acyltransferase	other
novel127	TTCAGATGAGAACTTTGA	1.08573	0.725073	0.427308	Score: 2.5	PGSC0003DMT400028781	PGSC0003DMG400011079	ER glycerol-phosphate acyltransferase	other
novel127	TTCAGATGAGAACTTTGA	1.08573	0.725073	0.427308	Score: 2.5	PGSC0003DMT400081258	PGSC0003DMG400031761	Fiber protein Fb2	other
novel127	TTCAGATGAGAACTTTGA	1.08573	0.725073	0.427308	Score: 2.5	PGSC0003DMT400056861	PGSC0003DMG402022115	SM10-1	other
novel127	TTCAGATGAGAACTTTGA	1.08573	0.725073	0.427308	Score: 2.5	PGSC0003DMT400032376	PGSC0003DMG400012434	Sodium/calcium exchanger family protein	other
novel127	TTCAGATGAGAACTTTGA	1.08573	0.725073	0.427308	Score: 2.5	PGSC0003DMT400001059	PGSC0003DMG400000399	Sodium-and lithium-tolerant 1	other
novel127	TTCAGATGAGAACTTTGA	1.08573	0.725073	0.427308	Score: 2.5	PGSC0003DMT400001060	PGSC0003DMG400000399	Sodium-and lithium-tolerant 1	other
novel127	TTCAGATGAGAACTTTGA	1.08573	0.725073	0.427308	Score: 2.5	PGSC0003DMT400010726	PGSC0003DMG400004187	Membrane protein ycf1	cell wall and Membrane
novel127	TTCAGATGAGAACTTTGA	1.08573	0.725073	0.427308	Score: 2.5	PGSC0003DMT400078142	PGSC0003DMG400030391	Bipolar kinesin KRP-130	growth
novel127	TTCAGATGAGAACTTTGA	1.08573	0.725073	0.427308	Score: 2.5	PGSC0003DMT400008946	PGSC0003DMG400003485	Plastid fibrillin 2	growth
novel127	TTCAGATGAGAACTTTGA	1.08573	0.725073	0.427308	Score: 2.5	PGSC0003DMT400020589	PGSC0003DMG400007972	ABA 8'-hydroxylase CYP707A2	hormone response
novel127	TTCAGATGAGAACTTTGA	1.08573	0.725073	0.427308	Score: 2.5	PGSC0003DMT400039968	PGSC0003DMG400015458	Lrr receptor protein kinase	kinase
novel127	TTCAGATGAGAACTTTGA	1.08573	0.725073	0.427308	Score: 2.5	PGSC0003DMT400039336	PGSC0003DMG400015212	Serine/threonine-protein phosphatase	kinase
novel127	TTCAGATGAGAACTTTGA	1.08573	0.725073	0.427308	Score: 2.5	PGSC0003DMT400037473	PGSC0003DMG400014459	Phosphoethanolamine N-methyltransferase	other enzyme
novel127	TTCAGATGAGAACTTTGA	1.08573	0.725073	0.427308	Score: 2.5	PGSC0003DMT400084278	PGSC0003DMG400033907	Isoflavone reductase homolog	secondary product
novel127	TTCAGATGAGAACTTTGA	1.08573	0.725073	0.427308	Score: 2.5	PGSC0003DMT400045089	PGSC0003DMG400017484	Heat shock factor protein	stress induced
novel127	TTCAGATGAGAACTTTGA	1.08573	0.725073	0.427308	Score: 2.5	PGSC0003DMT400037637	PGSC0003DMG402014514	PERK1 kinase	stress induced
novel127	TTCAGATGAGAACTTTGA	1.08573	0.725073	0.427308	Score: 2.5	PGSC0003DMT400037638	PGSC0003DMG402014514	PERK1 kinase	stress induced
novel127	TTCAGATGAGAACTTTGA	1.08573	0.725073	0.427308	Score: 2.5	PGSC0003DMT400003494	PGSC0003DMG402001381	Ubiquitin-protein ligase	Ubiquitin
novel127	TTCAGATGAGAACTTTGA	1.08573	0.725073	0.427308	Score: 2.5	PGSC0003DMT400031461	PGSC0003DMG400012065	Gene of unknown function	unknown
novel127	TTCAGATGAGAACTTTGA	1.08573	0.725073	0.427308	Score: 2.5	PGSC0003DMT400045204	PGSC0003DMG400017535	MYC transcription factor	Transcription factor
novel127	TTCAGATGAGAACTTTGA	1.08573	0.725073	0.427308	Score: 2.5	PGSC0003DMT400084227	PGSC0003DMG400033884	WRKY transcription factor 27	Transcription factor
novel127	TTCAGATGAGAACTTTGA	1.08573	0.725073	0.427308	Score: 2.5	PGSC0003DMT400056662	PGSC0003DMG400022034	Conserved gene of unknown function	unknown
novel127	TTCAGATGAGAACTTTGA	1.08573	0.725073	0.427308	Score: 2.5	PGSC0003DMT400062233	PGSC0003DMG400024218	Conserved gene of unknown function	unknown
novel127	TTCAGATGAGAACTTTGA	1.08573	0.725073	0.427308	Score: 2.5	PGSC0003DMT400095526	PGSC0003DMG400045097	Conserved gene of unknown function	unknown
novel127	TTCAGATGAGAACTTTGA	1.08573	0.725073	0.427308	Score: 2.5	PGSC0003DMT400095671	PGSC0003DMG400045242	Conserved gene of unknown function	unknown
novel127	TTCAGATGAGAACTTTGA	1.08573	0.725073	0.427308	Score: 2.5	PGSC0003DMT400096754	PGSC0003DMG400046325	Conserved gene of unknown function	unknown
novel127	TTCAGATGAGAACTTTGA	1.08573	0.725073	0.427308	Score: 2.0	PGSC0003DMT400061067	PGSC0003DMG402023760	Ankyrin domain protein	growth
novel127	TTCAGATGAGAACTTTGA	1.08573	0.725073	0.427308	Score: 2.0	PGSC0003DMT400043164	PGSC0003DMG400016748	Pentatricopeptide repeat-containing protein	growth
novel127	TTCAGATGAGAACTTTGA	1.08573	0.725073	0.427308	Score: 2.0	PGSC0003DMT400061888	PGSC0003DMG400024080	Conserved gene of unknown function	unknown
novel127	TTCAGATGAGAACTTTGA	1.08573	0.725073	0.427308	Score: 2.0	PGSC0003DMT400088246	PGSC0003DMG400037817	Conserved gene of unknown function	unknown
novel127	TTCAGATGAGAACTTTGA	1.08573	0.725073	0.427308	Score: 2.2	PGSC0003DMT400087933	PGSC0003DMG400037504	Conserved gene of unknown function	unknown
novel127	TTCAGATGAGAACTTTGA	1.08573	0.725073	0.427308	Score: 1.5	PGSC0003DMT400027131	PGSC0003DMG400010466	Lectin receptor kinase	kinase
novel127	TTCAGATGAGAACTTTGA	1.08573	0.725073	0.427308	Score: 0.5	PGSC0003DMT400092742	PGSC0003DMG400042313	Conserved gene of unknown function	unknown
novel128	TTCATTATGTCTCACTTTGAC	5.17809	2.98086	1.6024	Score: 2.5	PGSC0003DMT400004508	PGSC0003DMG400001794	Pentatricopeptide repeat-containing protein, chloroplastic	growth
novel128	TTCATTATGTCTCACTTTGAC	5.17809	2.98086	1.6024	Score: 2.5	PGSC0003DMT400004509	PGSC0003DMG400001794	Pentatricopeptide repeat-containing protein, chloroplastic	growth
novel128	TTCATTATGTCTCACTTTGAC	5.17809	2.98086	1.6024	Score: 2.5	PGSC0003DMT400004510	PGSC0003DMG400001794	Pentatricopeptide repeat-containing protein, chloroplastic	growth
novel128	TTCATTATGTCTCACTTTGAC	5.17809	2.98086	1.6024	Score: 2.5	PGSC0003DMT400004512	PGSC0003DMG400001794	Pentatricopeptide repeat-containing protein, chloroplastic	growth
novel128	TTCATTATGTCTCACTTTGAC	5.17809	2.98086	1.6024	Score: 2.5	PGSC0003DMT400051934	PGSC0003DMG400020155	ABI3	stress induced
novel128	TTCATTATGTCTCACTTTGAC	5.17809	2.98086	1.6024	Score: 1.5	PGSC0003DMT400087012	PGSC0003DMG400036583	Gene of unknown function	unknown
novel13	AACATCTCCAGCCATATTTGA	1.08573	1.04733	0	Score: 2.5	PGSC0003DMT400037459	PGSC0003DMG400014455	Diphosphoinositol polyphosphate phosphohydrolase	other
novel13	AACATCTCCAGCCATATTTGA	1.08573	1.04733	0	Score: 2.5	PGSC0003DMT400043505	PGSC0003DMG400016890	LIM domain containing protein	other
novel13	AACATCTCCAGCCATATTTGA	1.08573	1.04733	0	Score: 2.5	PGSC0003DMT400043506	PGSC0003DMG400016890	LIM domain containing protein	other
novel13	AACATCTCCAGCCATATTTGA	1.08573	1.04733	0	Score: 2.0	PGSC0003DMT400064005	PGSC0003DMG400024878	Zinc finger family protein	Transcription factor
novel13	AACATCTCCAGCCATATTTGA	1.08573	1.04733	0	Score: 0.5	PGSC0003DMT400064009	PGSC0003DMG400024880	Conserved gene of unknown function	unknown
novel13	AACATCTCCAGCCATATTTGA	1.08573	1.04733	0	Score: 0.5	PGSC0003DMT400064010	PGSC0003DMG400024880	Conserved gene of unknown function	unknown
novel13	AACATCTCCAGCCATATTTGA	1.08573	1.04733	0	Score: 1.5	PGSC0003DMT400074356	PGSC0003DMG401028902	ATP binding protein	other
novel13	AACATCTCCAGCCATATTTGA	1.08573	1.04733	0	Score: 1.5	PGSC0003DMT400074357	PGSC0003DMG401028902	ATP binding protein	other
novel131	TTGAGCCGCGCCAATATCACG	3.17367	1.85296	0.747789	Score: 2.0	PGSC0003DMT400031475	PGSC0003DMG400012071	Nodulation signaling pathway 2 protein	other
novel131	TTGAGCCGCGCCAATATCACG	3.17367	1.85296	0.747789	Score: 2.2	PGSC0003DMT400033037	PGSC0003DMG400012683	GRAS family transcription factor	Transcription factor
novel131	TTGAGCCGCGCCAATATCACG	3.17367	1.85296	0.747789	Score: 2.2	PGSC0003DMT400089455	PGSC0003DMG400039026	Gene of unknown function	unknown
novel131	TTGAGCCGCGCCAATATCACG	3.17367	1.85296	0.747789	Score: 1.0	PGSC0003DMT400012104	PGSC0003DMG400004752	Hairy meristem	growth
novel131	TTGAGCCGCGCCAATATCACG	3.17367	1.85296	0.747789	Score: 1.0	PGSC0003DMT400066799	PGSC0003DMG400025973	GRAS family transcription factor	Transcription factor
novel132	TTGCTTTGTTCTTTGTTCGAG	0.584623	0.8862	0	Score: 2.5	PGSC0003DMT400057606	PGSC0003DMG400022369	Dead box ATP-dependent RNA helicase	other
novel132	TTGCTTTGTTCTTTGTTCGAG	0.584623	0.8862	0	Score: 2.5	PGSC0003DMT400057607	PGSC0003DMG400022369	Dead box ATP-dependent RNA helicase	other
novel132	TTGCTTTGTTCTTTGTTCGAG	0.584623	0.8862	0	Score: 2.5	PGSC0003DMT400057608	PGSC0003DMG400022369	Dead box ATP-dependent RNA helicase	other
novel132	TTGCTTTGTTCTTTGTTCGAG	0.584623	0.8862	0	Score: 2.5	PGSC0003DMT400057609	PGSC0003DMG400022369	Dead box ATP-dependent RNA helicase	other
novel132	TTGCTTTGTTCTTTGTTCGAG	0.584623	0.8862	0	Score: 2.5	PGSC0003DMT400092684	PGSC0003DMG400042255	Gag-pol protein	other
novel132	TTGCTTTGTTCTTTGTTCGAG	0.584623	0.8862	0	Score: 2.5	PGSC0003DMT400061893	PGSC0003DMG400024081	Oligopeptide transporter	other
novel132	TTGCTTTGTTCTTTGTTCGAG	0.584623	0.8862	0	Score: 2.5	PGSC0003DMT400061894	PGSC0003DMG400024081	Oligopeptide transporter	other
novel132	TTGCTTTGTTCTTTGTTCGAG	0.584623	0.8862	0	Score: 2.5	PGSC0003DMT400066614	PGSC0003DMG400025894	PRPK	other
novel132	TTGCTTTGTTCTTTGTTCGAG	0.584623	0.8862	0	Score: 2.5	PGSC0003DMT400093740	PGSC0003DMG400043311	Transposon MuDR mudrA	other
novel132	TTGCTTTGTTCTTTGTTCGAG	0.584623	0.8862	0	Score: 2.5	PGSC0003DMT400029639	PGSC0003DMG400011395	Chloroplast protein import component Toc159	growth
novel132	TTGCTTTGTTCTTTGTTCGAG	0.584623	0.8862	0	Score: 2.5	PGSC0003DMT400029640	PGSC0003DMG400011395	Chloroplast protein import component Toc159	growth
novel132	TTGCTTTGTTCTTTGTTCGAG	0.584623	0.8862	0	Score: 2.5	PGSC0003DMT400040259	PGSC0003DMG400015584	Peroxidase 65	other enzyme
novel132	TTGCTTTGTTCTTTGTTCGAG	0.584623	0.8862	0	Score: 2.5	PGSC0003DMT400040260	PGSC0003DMG400015584	Peroxidase 65	other enzyme
novel132	TTGCTTTGTTCTTTGTTCGAG	0.584623	0.8862	0	Score: 2.5	PGSC0003DMT400015582	PGSC0003DMG400006083	CBL-interacting protein kinase 20	R gene
novel132	TTGCTTTGTTCTTTGTTCGAG	0.584623	0.8862	0	Score: 2.5	PGSC0003DMT400005354	PGSC0003DMG400002090	Non-race specific disease resistance protein 1 b	R gene
novel132	TTGCTTTGTTCTTTGTTCGAG	0.584623	0.8862	0	Score: 2.5	PGSC0003DMT400007023	PGSC0003DMG402002714	Gene of unknown function	unknown
novel132	TTGCTTTGTTCTTTGTTCGAG	0.584623	0.8862	0	Score: 2.5	PGSC0003DMT400007024	PGSC0003DMG402002714	Gene of unknown function	unknown
novel132	TTGCTTTGTTCTTTGTTCGAG	0.584623	0.8862	0	Score: 2.5	PGSC0003DMT400007025	PGSC0003DMG402002714	Gene of unknown function	unknown
novel132	TTGCTTTGTTCTTTGTTCGAG	0.584623	0.8862	0	Score: 2.2	PGSC0003DMT400021880	PGSC0003DMG400008491	ATP binding protein	other
novel132	TTGCTTTGTTCTTTGTTCGAG	0.584623	0.8862	0	Score: 2.2	PGSC0003DMT400021881	PGSC0003DMG400008491	ATP binding protein	other
novel132	TTGCTTTGTTCTTTGTTCGAG	0.584623	0.8862	0	Score: 2.2	PGSC0003DMT400024214	PGSC0003DMG400009356	DsRNA-binding protein	other
novel132	TTGCTTTGTTCTTTGTTCGAG	0.584623	0.8862	0	Score: 2.2	PGSC0003DMT400024215	PGSC0003DMG400009356	DsRNA-binding protein	other
novel132	TTGCTTTGTTCTTTGTTCGAG	0.584623	0.8862	0	Score: 2.2	PGSC0003DMT400065724	PGSC0003DMG400025577	Polyphosphoinositide binding protein Ssh2p	other
novel132	TTGCTTTGTTCTTTGTTCGAG	0.584623	0.8862	0	Score: 2.2	PGSC0003DMT400055571	PGSC0003DMG400021583	Conserved gene of unknown function	unknown
novel132	TTGCTTTGTTCTTTGTTCGAG	0.584623	0.8862	0	Score: 1.5	PGSC0003DMT400013262	PGSC0003DMG401005180	Carbon-nitrogen hydrolase family protein	growth
novel132	TTGCTTTGTTCTTTGTTCGAG	0.584623	0.8862	0	Score: 1.5	PGSC0003DMT400013267	PGSC0003DMG402005180	Carbon-nitrogen hydrolase family protein	growth
novel132	TTGCTTTGTTCTTTGTTCGAG	0.584623	0.8862	0	Score: 1.5	PGSC0003DMT400020472	PGSC0003DMG400007912	Leucine-rich repeat family protein	NBS-LRR protein
novel132	TTGCTTTGTTCTTTGTTCGAG	0.584623	0.8862	0	Score: 1.8	PGSC0003DMT400059330	PGSC0003DMG400023053	F-box protein	Transcription factor
novel135	TTGGTTGAGTGAGCATCTAAG	430.533	360.684	97.3194	Score: 2.5	PGSC0003DMT400047662	PGSC0003DMG400018525	Importin beta-1	other
novel135	TTGGTTGAGTGAGCATCTAAG	430.533	360.684	97.3194	Score: 2.5	PGSC0003DMT400009219	PGSC0003DMG400003578	Cold inducible histidine kinase 1	stress induced
novel135	TTGGTTGAGTGAGCATCTAAG	430.533	360.684	97.3194	Score: 2.5	PGSC0003DMT400009220	PGSC0003DMG400003578	Cold inducible histidine kinase 1	stress induced
novel135	TTGGTTGAGTGAGCATCTAAG	430.533	360.684	97.3194	Score: 2.5	PGSC0003DMT400009221	PGSC0003DMG400003578	Cold inducible histidine kinase 1	stress induced
novel135	TTGGTTGAGTGAGCATCTAAG	430.533	360.684	97.3194	Score: 2.5	PGSC0003DMT400004622	PGSC0003DMG400001832	Conserved gene of unknown function	unknown
novel137	TTTCATACCTGAACTATTGGG	1.08573	0	0	Score: 2.5	PGSC0003DMT400004833	PGSC0003DMG400001920	Translin family protein	other
novel137	TTTCATACCTGAACTATTGGG	1.08573	0	0	Score: 2.5	PGSC0003DMT400004835	PGSC0003DMG400001920	Translin family protein	other
novel137	TTTCATACCTGAACTATTGGG	1.08573	0	0	Score: 2.5	PGSC0003DMT400004836	PGSC0003DMG400001920	Translin family protein	other
novel137	TTTCATACCTGAACTATTGGG	1.08573	0	0	Score: 2.5	PGSC0003DMT400004934	PGSC0003DMG400001955	Pentatricopeptide repeat-containing protein, mitochondrial	growth
novel137	TTTCATACCTGAACTATTGGG	1.08573	0	0	Score: 2.5	PGSC0003DMT400059872	PGSC0003DMG400023291	Conserved gene of unknown function	unknown
novel137	TTTCATACCTGAACTATTGGG	1.08573	0	0	Score: 2.2	PGSC0003DMT400066544	PGSC0003DMG400025862	UDP-glucose:glucosyltransferase	cell wall and Membrane
novel138	TTTCATCGTGATGGGGATA	69.4032	70.2515	42.3035	Score: 2.5	PGSC0003DMT400069591	PGSC0003DMG400027056	Agenet domain-containing protein	other enzyme
novel138	TTTCATCGTGATGGGGATA	69.4032	70.2515	42.3035	Score: 2.5	PGSC0003DMT400058632	PGSC0003DMG400022781	Conserved gene of unknown function	unknown
novel138	TTTCATCGTGATGGGGATA	69.4032	70.2515	42.3035	Score: 2.0	PGSC0003DMT400015398	PGSC0003DMG400006004	Thaumatin	other
novel138	TTTCATCGTGATGGGGATA	69.4032	70.2515	42.3035	Score: 2.2	PGSC0003DMT400094332	PGSC0003DMG400043903	'chromo' domain containing protein	other
novel138	TTTCATCGTGATGGGGATA	69.4032	70.2515	42.3035	Score: 2.2	PGSC0003DMT400019985	PGSC0003DMG400007733	HD domain class transcription factor	Transcription factor
novel138	TTTCATCGTGATGGGGATA	69.4032	70.2515	42.3035	Score: 2.2	PGSC0003DMT400019986	PGSC0003DMG400007733	HD domain class transcription factor	Transcription factor
novel14	AACGGATAAGATTGTGCCACGTGT	1.58684	1.20846	0.320481	Score: 2.5	PGSC0003DMT400037015	PGSC0003DMG400014267	Multidrug resistance pump	R gene
novel2	AAAACTTAAAAACTCCGACGGG	0.751659	0.483382	0.320481	Score: 1.5	PGSC0003DMT400005961	PGSC0003DMG400002315	Conserved gene of unknown function	unknown
novel21	AAGCTAGAGGTGTCAGAA	1.83739	1.20846	0.961443	Score: 2.5	PGSC0003DMT400000836	PGSC0003DMG400000311	Protein cbxX, chromosomal	other
novel21	AAGCTAGAGGTGTCAGAA	1.83739	1.20846	0.961443	Score: 2.5	PGSC0003DMT400019029	PGSC0003DMG400007373	Beta-ketoacyl-coa synthase family protein	other
novel21	AAGCTAGAGGTGTCAGAA	1.83739	1.20846	0.961443	Score: 2.5	PGSC0003DMT400035780	PGSC0003DMG400013773	Integrase core domain containing protein	other
novel21	AAGCTAGAGGTGTCAGAA	1.83739	1.20846	0.961443	Score: 2.5	PGSC0003DMT400052872	PGSC0003DMG400020514	Peptide transporter	other
novel21	AAGCTAGAGGTGTCAGAA	1.83739	1.20846	0.961443	Score: 2.5	PGSC0003DMT400052873	PGSC0003DMG400020514	Peptide transporter	other
novel21	AAGCTAGAGGTGTCAGAA	1.83739	1.20846	0.961443	Score: 2.5	PGSC0003DMT400052874	PGSC0003DMG400020514	Peptide transporter	other
novel21	AAGCTAGAGGTGTCAGAA	1.83739	1.20846	0.961443	Score: 2.5	PGSC0003DMT400055112	PGSC0003DMG400021384	PGPS/D7	other
novel21	AAGCTAGAGGTGTCAGAA	1.83739	1.20846	0.961443	Score: 2.5	PGSC0003DMT400005303	PGSC0003DMG400002079	Galactolipase/ phospholipase	cell wall and Membrane
novel21	AAGCTAGAGGTGTCAGAA	1.83739	1.20846	0.961443	Score: 2.5	PGSC0003DMT400040463	PGSC0003DMG401015669	Glucan endo-1,3-beta-glucosidase	cell wall and Membrane
novel21	AAGCTAGAGGTGTCAGAA	1.83739	1.20846	0.961443	Score: 2.5	PGSC0003DMT400040464	PGSC0003DMG401015669	Glucan endo-1,3-beta-glucosidase	cell wall and Membrane
novel21	AAGCTAGAGGTGTCAGAA	1.83739	1.20846	0.961443	Score: 2.5	PGSC0003DMT400040465	PGSC0003DMG401015669	Glucan endo-1,3-beta-glucosidase	cell wall and Membrane
novel21	AAGCTAGAGGTGTCAGAA	1.83739	1.20846	0.961443	Score: 2.5	PGSC0003DMT400032246	PGSC0003DMG400012388	Glycosyltransferase	cell wall and Membrane
novel21	AAGCTAGAGGTGTCAGAA	1.83739	1.20846	0.961443	Score: 2.5	PGSC0003DMT400009070	PGSC0003DMG400003531	Dhn1 protein	growth
novel21	AAGCTAGAGGTGTCAGAA	1.83739	1.20846	0.961443	Score: 2.5	PGSC0003DMT400015998	PGSC0003DMG401006258	Monoterpene synthase 2	secondary product
novel21	AAGCTAGAGGTGTCAGAA	1.83739	1.20846	0.961443	Score: 2.5	PGSC0003DMT400015999	PGSC0003DMG401006258	Monoterpene synthase 2	secondary product
novel21	AAGCTAGAGGTGTCAGAA	1.83739	1.20846	0.961443	Score: 2.5	PGSC0003DMT400024359	PGSC0003DMG400009420	Ring finger protein	Transcription factor
novel21	AAGCTAGAGGTGTCAGAA	1.83739	1.20846	0.961443	Score: 2.5	PGSC0003DMT400027085	PGSC0003DMG400010447	Serine-threonine protein kinase, plant-type	kinase
novel21	AAGCTAGAGGTGTCAGAA	1.83739	1.20846	0.961443	Score: 2.5	PGSC0003DMT400028070	PGSC0003DMG401010824	Calmodulin-binding protein	growth
novel21	AAGCTAGAGGTGTCAGAA	1.83739	1.20846	0.961443	Score: 2.5	PGSC0003DMT400036023	PGSC0003DMG401013876	S-locus-specific glycoprotein S6	cell wall and Membrane
novel21	AAGCTAGAGGTGTCAGAA	1.83739	1.20846	0.961443	Score: 2.5	PGSC0003DMT400036027	PGSC0003DMG401013876	S-locus-specific glycoprotein S6	cell wall and Membrane
novel21	AAGCTAGAGGTGTCAGAA	1.83739	1.20846	0.961443	Score: 2.5	PGSC0003DMT400036028	PGSC0003DMG401013876	S-locus-specific glycoprotein S6	cell wall and Membrane
novel21	AAGCTAGAGGTGTCAGAA	1.83739	1.20846	0.961443	Score: 2.5	PGSC0003DMT400036030	PGSC0003DMG402013876	S-locus-specific glycoprotein S6	cell wall and Membrane
novel21	AAGCTAGAGGTGTCAGAA	1.83739	1.20846	0.961443	Score: 2.5	PGSC0003DMT400059121	PGSC0003DMG400022966	Calmodulin	growth
novel21	AAGCTAGAGGTGTCAGAA	1.83739	1.20846	0.961443	Score: 2.5	PGSC0003DMT400059123	PGSC0003DMG400022966	Calmodulin	growth
novel21	AAGCTAGAGGTGTCAGAA	1.83739	1.20846	0.961443	Score: 2.5	PGSC0003DMT400037025	PGSC0003DMG400014270	(S)-N-methylcoclaurine 3'-hydroxylase isozyme	other enzyme
novel21	AAGCTAGAGGTGTCAGAA	1.83739	1.20846	0.961443	Score: 2.5	PGSC0003DMT400037026	PGSC0003DMG400014270	(S)-N-methylcoclaurine 3'-hydroxylase isozyme	other enzyme
novel21	AAGCTAGAGGTGTCAGAA	1.83739	1.20846	0.961443	Score: 2.5	PGSC0003DMT400041281	PGSC0003DMG400015977	CBL-interacting protein kinase 07	R gene
novel21	AAGCTAGAGGTGTCAGAA	1.83739	1.20846	0.961443	Score: 2.5	PGSC0003DMT400041996	PGSC0003DMG400016290	Serine/threonine-protein phosphatase	kinase
novel21	AAGCTAGAGGTGTCAGAA	1.83739	1.20846	0.961443	Score: 2.5	PGSC0003DMT400041998	PGSC0003DMG400016290	Serine/threonine-protein phosphatase	kinase
novel21	AAGCTAGAGGTGTCAGAA	1.83739	1.20846	0.961443	Score: 2.5	PGSC0003DMT400041999	PGSC0003DMG400016290	Serine/threonine-protein phosphatase	kinase
novel21	AAGCTAGAGGTGTCAGAA	1.83739	1.20846	0.961443	Score: 2.5	PGSC0003DMT400045499	PGSC0003DMG400017650	Receptor serine-threonine protein kinase	kinase
novel21	AAGCTAGAGGTGTCAGAA	1.83739	1.20846	0.961443	Score: 2.5	PGSC0003DMT400078406	PGSC0003DMG400030525	EIN3-binding F-box protein 1	growth
novel21	AAGCTAGAGGTGTCAGAA	1.83739	1.20846	0.961443	Score: 2.5	PGSC0003DMT400058948	PGSC0003DMG400022900	Serine/threonine-protein kinase PBS1	kinase
novel21	AAGCTAGAGGTGTCAGAA	1.83739	1.20846	0.961443	Score: 2.5	PGSC0003DMT400063151	PGSC0003DMG400024561	Ser/Thr protein kinase	kinase
novel21	AAGCTAGAGGTGTCAGAA	1.83739	1.20846	0.961443	Score: 2.5	PGSC0003DMT400063152	PGSC0003DMG400024561	Ser/Thr protein kinase	kinase
novel21	AAGCTAGAGGTGTCAGAA	1.83739	1.20846	0.961443	Score: 2.5	PGSC0003DMT400063153	PGSC0003DMG400024561	Ser/Thr protein kinase	kinase
novel21	AAGCTAGAGGTGTCAGAA	1.83739	1.20846	0.961443	Score: 2.5	PGSC0003DMT400063154	PGSC0003DMG400024561	Ser/Thr protein kinase	kinase
novel21	AAGCTAGAGGTGTCAGAA	1.83739	1.20846	0.961443	Score: 2.5	PGSC0003DMT400064089	PGSC0003DMG400024905	Pentatricopeptide repeat-containing protein	growth
novel21	AAGCTAGAGGTGTCAGAA	1.83739	1.20846	0.961443	Score: 2.5	PGSC0003DMT400068762	PGSC0003DMG400026743	CBL-interacting protein kinase 16	R gene
novel21	AAGCTAGAGGTGTCAGAA	1.83739	1.20846	0.961443	Score: 2.5	PGSC0003DMT400076996	PGSC0003DMG400029947	Gene of unknown function	unknown
novel21	AAGCTAGAGGTGTCAGAA	1.83739	1.20846	0.961443	Score: 2.5	PGSC0003DMT400078494	PGSC0003DMG400030556	Gene of unknown function	unknown
novel21	AAGCTAGAGGTGTCAGAA	1.83739	1.20846	0.961443	Score: 2.5	PGSC0003DMT400079636	PGSC0003DMG400031013	Stress-associated protein 8	stress induced
novel21	AAGCTAGAGGTGTCAGAA	1.83739	1.20846	0.961443	Score: 2.5	PGSC0003DMT400079637	PGSC0003DMG400031013	Stress-associated protein 8	stress induced
novel21	AAGCTAGAGGTGTCAGAA	1.83739	1.20846	0.961443	Score: 2.5	PGSC0003DMT400087419	PGSC0003DMG400036990	Periaxin	growth
novel21	AAGCTAGAGGTGTCAGAA	1.83739	1.20846	0.961443	Score: 2.5	PGSC0003DMT400087434	PGSC0003DMG400037005	Gene of unknown function	unknown
novel21	AAGCTAGAGGTGTCAGAA	1.83739	1.20846	0.961443	Score: 2.5	PGSC0003DMT400089688	PGSC0003DMG400039259	Gene of unknown function	unknown
novel21	AAGCTAGAGGTGTCAGAA	1.83739	1.20846	0.961443	Score: 2.5	PGSC0003DMT400090748	PGSC0003DMG400040319	Gene of unknown function	unknown
novel21	AAGCTAGAGGTGTCAGAA	1.83739	1.20846	0.961443	Score: 2.5	PGSC0003DMT400093608	PGSC0003DMG400043179	Gene of unknown function	unknown
novel21	AAGCTAGAGGTGTCAGAA	1.83739	1.20846	0.961443	Score: 2.5	PGSC0003DMT400093616	PGSC0003DMG400043187	Gene of unknown function	unknown
novel21	AAGCTAGAGGTGTCAGAA	1.83739	1.20846	0.961443	Score: 2.5	PGSC0003DMT400094653	PGSC0003DMG400044224	Gene of unknown function	unknown
novel21	AAGCTAGAGGTGTCAGAA	1.83739	1.20846	0.961443	Score: 2.5	PGSC0003DMT400097544	PGSC0003DMG400047115	Gene of unknown function	unknown
novel21	AAGCTAGAGGTGTCAGAA	1.83739	1.20846	0.961443	Score: 2.5	PGSC0003DMT400023495	PGSC0003DMG400009100	Conserved gene of unknown function	unknown
novel21	AAGCTAGAGGTGTCAGAA	1.83739	1.20846	0.961443	Score: 2.5	PGSC0003DMT400023496	PGSC0003DMG400009100	Conserved gene of unknown function	unknown
novel21	AAGCTAGAGGTGTCAGAA	1.83739	1.20846	0.961443	Score: 2.5	PGSC0003DMT400036682	PGSC0003DMG400014148	Conserved gene of unknown function	unknown
novel21	AAGCTAGAGGTGTCAGAA	1.83739	1.20846	0.961443	Score: 2.5	PGSC0003DMT400036683	PGSC0003DMG400014148	Conserved gene of unknown function	unknown
novel21	AAGCTAGAGGTGTCAGAA	1.83739	1.20846	0.961443	Score: 2.5	PGSC0003DMT400038551	PGSC0003DMG400014891	Conserved gene of unknown function	unknown
novel21	AAGCTAGAGGTGTCAGAA	1.83739	1.20846	0.961443	Score: 2.5	PGSC0003DMT400057232	PGSC0003DMG400022231	Conserved gene of unknown function	unknown
novel21	AAGCTAGAGGTGTCAGAA	1.83739	1.20846	0.961443	Score: 2.5	PGSC0003DMT400057235	PGSC0003DMG400022231	Conserved gene of unknown function	unknown
novel21	AAGCTAGAGGTGTCAGAA	1.83739	1.20846	0.961443	Score: 2.5	PGSC0003DMT400090723	PGSC0003DMG400040294	Conserved gene of unknown function	unknown
novel21	AAGCTAGAGGTGTCAGAA	1.83739	1.20846	0.961443	Score: 2.5	PGSC0003DMT400094598	PGSC0003DMG400044169	Conserved gene of unknown function	unknown
novel21	AAGCTAGAGGTGTCAGAA	1.83739	1.20846	0.961443	Score: 2.0	PGSC0003DMT400032268	PGSC0003DMG400012396	Lanceolate	growth
novel21	AAGCTAGAGGTGTCAGAA	1.83739	1.20846	0.961443	Score: 2.0	PGSC0003DMT400032269	PGSC0003DMG400012396	Lanceolate	growth
novel21	AAGCTAGAGGTGTCAGAA	1.83739	1.20846	0.961443	Score: 2.0	PGSC0003DMT400046260	PGSC0003DMG400017958	Nucleotide pyrophosphatase/phosphodiesterase	other
novel21	AAGCTAGAGGTGTCAGAA	1.83739	1.20846	0.961443	Score: 2.0	PGSC0003DMT400090794	PGSC0003DMG400040365	Conserved gene of unknown function	unknown
novel21	AAGCTAGAGGTGTCAGAA	1.83739	1.20846	0.961443	Score: 2.0	PGSC0003DMT400092270	PGSC0003DMG400041841	Polyprotein protein	other
novel21	AAGCTAGAGGTGTCAGAA	1.83739	1.20846	0.961443	Score: 1.5	PGSC0003DMT400007173	PGSC0003DMG400002775	Pyrophosphate-energized vacuolar membrane proton pump	cell wall and Membrane
novel21	AAGCTAGAGGTGTCAGAA	1.83739	1.20846	0.961443	Score: 0.0	PGSC0003DMT400080875	PGSC0003DMG400031495	Senescence-associated protein	growth
novel21	AAGCTAGAGGTGTCAGAA	1.83739	1.20846	0.961443	Score: 1.0	PGSC0003DMT400050728	PGSC0003DMG400019698	BRI1 protein	other
novel22	AAGGTGTGTCTCTGAAATTTCGGT	1.33628	0.725073	0.854616	Score: 2.0	PGSC0003DMT400037471	PGSC0003DMG400014458	Pollen-specific C2 domain containing protein	growth
novel23	AAGGTGTGTCTCTGAGATTTCAGT	7.26603	6.36453	5.1277	Score: 1.5	PGSC0003DMT400037471	PGSC0003DMG400014458	Pollen-specific C2 domain containing protein	growth
novel24	AAGTGCTGATACATTAATCTGATG	1.75387	0.8862	0.320481	Score: 2.2	PGSC0003DMT400092241	PGSC0003DMG400041812	Ulp1 protease family, C-terminal catalytic domain containing protein	other
novel25	AAGTGTCAAAAATTGAATGGAGCC	1.16925	0.563946	0.534135	Score: 2.2	PGSC0003DMT400083215	PGSC0003DMG400033123	Basic 7S globulin 2 small subunit	other
novel3	AAAAGTATGACGGAGGGTATCTGT	1.08573	0.402818	0	Score: 0.5	PGSC0003DMT400013670	PGSC0003DMG400005345	Gene of unknown function	unknown
novel3	AAAAGTATGACGGAGGGTATCTGT	1.08573	0.402818	0	Score: 1.5	PGSC0003DMT400021686	PGSC0003DMG400008413	Endo-1,4-beta-D-glucanase	cell wall and Membrane
novel3	AAAAGTATGACGGAGGGTATCTGT	1.08573	0.402818	0	Score: 1.5	PGSC0003DMT400021688	PGSC0003DMG400008413	Endo-1,4-beta-D-glucanase	cell wall and Membrane
novel30	AATCCTTCAGCAATCCATA	9.18694	3.70593	1.28192	Score: 2.5	PGSC0003DMT400009864	PGSC0003DMG400003868	Amino acid binding protein	other
novel30	AATCCTTCAGCAATCCATA	9.18694	3.70593	1.28192	Score: 2.5	PGSC0003DMT400088848	PGSC0003DMG400038419	RNA binding protein	other
novel30	AATCCTTCAGCAATCCATA	9.18694	3.70593	1.28192	Score: 2.5	PGSC0003DMT400032625	PGSC0003DMG400012528	Membrane bound O-acyl transferase family protein	cell wall and Membrane
novel30	AATCCTTCAGCAATCCATA	9.18694	3.70593	1.28192	Score: 2.5	PGSC0003DMT400032627	PGSC0003DMG400012528	Membrane bound O-acyl transferase family protein	cell wall and Membrane
novel30	AATCCTTCAGCAATCCATA	9.18694	3.70593	1.28192	Score: 2.5	PGSC0003DMT400041941	PGSC0003DMG400016268	Chlorophyllase	growth
novel30	AATCCTTCAGCAATCCATA	9.18694	3.70593	1.28192	Score: 2.5	PGSC0003DMT400095519	PGSC0003DMG400045090	Pentatricopeptide repeat-containing protein	growth
novel30	AATCCTTCAGCAATCCATA	9.18694	3.70593	1.28192	Score: 2.5	PGSC0003DMT400001893	PGSC0003DMG400000713	Nitrate and chloride transporter	transport related
novel30	AATCCTTCAGCAATCCATA	9.18694	3.70593	1.28192	Score: 2.5	PGSC0003DMT400001894	PGSC0003DMG400000713	Nitrate and chloride transporter	transport related
novel30	AATCCTTCAGCAATCCATA	9.18694	3.70593	1.28192	Score: 2.5	PGSC0003DMT400005006	PGSC0003DMG402001979	Disease resistance protein BS2	R gene
novel30	AATCCTTCAGCAATCCATA	9.18694	3.70593	1.28192	Score: 2.5	PGSC0003DMT400005011	PGSC0003DMG400001981	NBS-LRR protein	NBS-LRR protein
novel30	AATCCTTCAGCAATCCATA	9.18694	3.70593	1.28192	Score: 2.5	PGSC0003DMT400005013	PGSC0003DMG400001983	Disease resistance protein BS2	R gene
novel30	AATCCTTCAGCAATCCATA	9.18694	3.70593	1.28192	Score: 2.5	PGSC0003DMT400005040	PGSC0003DMG400001992	Disease resistance protein BS2	R gene
novel30	AATCCTTCAGCAATCCATA	9.18694	3.70593	1.28192	Score: 2.5	PGSC0003DMT400005041	PGSC0003DMG400001993	Disease resistance protein Gpa2	R gene
novel30	AATCCTTCAGCAATCCATA	9.18694	3.70593	1.28192	Score: 2.5	PGSC0003DMT400005733	PGSC0003DMG402002242	Disease resistance protein	R gene
novel30	AATCCTTCAGCAATCCATA	9.18694	3.70593	1.28192	Score: 2.5	PGSC0003DMT400012121	PGSC0003DMG400004756	Disease resistance protein	R gene
novel30	AATCCTTCAGCAATCCATA	9.18694	3.70593	1.28192	Score: 2.5	PGSC0003DMT400012479	PGSC0003DMG400004873	Resistance protein PSH-RGH6	R gene
novel30	AATCCTTCAGCAATCCATA	9.18694	3.70593	1.28192	Score: 2.5	PGSC0003DMT400012486	PGSC0003DMG400004874	Resistance protein PSH-RGH7	R gene
novel30	AATCCTTCAGCAATCCATA	9.18694	3.70593	1.28192	Score: 2.5	PGSC0003DMT400078298	PGSC0003DMG400030474	Nodulation receptor kinase	kinase
novel30	AATCCTTCAGCAATCCATA	9.18694	3.70593	1.28192	Score: 2.5	PGSC0003DMT400078299	PGSC0003DMG400030474	Nodulation receptor kinase	kinase
novel30	AATCCTTCAGCAATCCATA	9.18694	3.70593	1.28192	Score: 2.5	PGSC0003DMT400017538	PGSC0003DMG400006800	NBS-LRR protein	NBS-LRR protein
novel30	AATCCTTCAGCAATCCATA	9.18694	3.70593	1.28192	Score: 2.5	PGSC0003DMT400017539	PGSC0003DMG400006800	NBS-LRR protein	NBS-LRR protein
novel30	AATCCTTCAGCAATCCATA	9.18694	3.70593	1.28192	Score: 2.5	PGSC0003DMT400021372	PGSC0003DMG400008292	NBS-LRR resistance protein	NBS-LRR protein
novel30	AATCCTTCAGCAATCCATA	9.18694	3.70593	1.28192	Score: 2.5	PGSC0003DMT400022304	PGSC0003DMG400008660	Sugar transporter	transport related
novel30	AATCCTTCAGCAATCCATA	9.18694	3.70593	1.28192	Score: 2.5	PGSC0003DMT400022305	PGSC0003DMG400008660	Sugar transporter	transport related
novel30	AATCCTTCAGCAATCCATA	9.18694	3.70593	1.28192	Score: 2.5	PGSC0003DMT400022306	PGSC0003DMG400008660	Sugar transporter	transport related
novel30	AATCCTTCAGCAATCCATA	9.18694	3.70593	1.28192	Score: 2.5	PGSC0003DMT400022307	PGSC0003DMG400008660	Sugar transporter	transport related
novel30	AATCCTTCAGCAATCCATA	9.18694	3.70593	1.28192	Score: 2.5	PGSC0003DMT400022308	PGSC0003DMG400008660	Sugar transporter	transport related
novel30	AATCCTTCAGCAATCCATA	9.18694	3.70593	1.28192	Score: 2.5	PGSC0003DMT400022309	PGSC0003DMG400008660	Sugar transporter	transport related
novel30	AATCCTTCAGCAATCCATA	9.18694	3.70593	1.28192	Score: 2.5	PGSC0003DMT400022310	PGSC0003DMG400008660	Sugar transporter	transport related
novel30	AATCCTTCAGCAATCCATA	9.18694	3.70593	1.28192	Score: 2.5	PGSC0003DMT400049253	PGSC0003DMG401019148	Leucine-rich repeat-containing protein 2, lrrc2	NBS-LRR protein
novel30	AATCCTTCAGCAATCCATA	9.18694	3.70593	1.28192	Score: 2.5	PGSC0003DMT400049255	PGSC0003DMG401019148	Leucine-rich repeat-containing protein 2, lrrc2	NBS-LRR protein
novel30	AATCCTTCAGCAATCCATA	9.18694	3.70593	1.28192	Score: 2.5	PGSC0003DMT400046497	PGSC0003DMG400018047	Disease resistance protein	R gene
novel30	AATCCTTCAGCAATCCATA	9.18694	3.70593	1.28192	Score: 2.5	PGSC0003DMT400050824	PGSC0003DMG400019741	NRC1	NBS-LRR protein
novel30	AATCCTTCAGCAATCCATA	9.18694	3.70593	1.28192	Score: 2.5	PGSC0003DMT400050825	PGSC0003DMG400019741	NRC1	NBS-LRR protein
novel30	AATCCTTCAGCAATCCATA	9.18694	3.70593	1.28192	Score: 2.5	PGSC0003DMT400050826	PGSC0003DMG400019741	NRC1	NBS-LRR protein
novel30	AATCCTTCAGCAATCCATA	9.18694	3.70593	1.28192	Score: 2.5	PGSC0003DMT400053452	PGSC0003DMG400020736	Late blight resistance protein Rpi-blb2	R gene
novel30	AATCCTTCAGCAATCCATA	9.18694	3.70593	1.28192	Score: 2.5	PGSC0003DMT400059783	PGSC0003DMG400023249	NBS-LRR resistance protein	NBS-LRR protein
novel30	AATCCTTCAGCAATCCATA	9.18694	3.70593	1.28192	Score: 2.5	PGSC0003DMT400061724	PGSC0003DMG400024023	Mads box protein	Transcription factor
novel30	AATCCTTCAGCAATCCATA	9.18694	3.70593	1.28192	Score: 2.5	PGSC0003DMT400061726	PGSC0003DMG400024024	Type I MADS box transcription factor	Transcription factor
novel30	AATCCTTCAGCAATCCATA	9.18694	3.70593	1.28192	Score: 2.5	PGSC0003DMT400066993	PGSC0003DMG401026043	NRC1	NBS-LRR protein
novel30	AATCCTTCAGCAATCCATA	9.18694	3.70593	1.28192	Score: 2.5	PGSC0003DMT400066999	PGSC0003DMG401026043	NRC1	NBS-LRR protein
novel30	AATCCTTCAGCAATCCATA	9.18694	3.70593	1.28192	Score: 2.5	PGSC0003DMT400066996	PGSC0003DMG404026043	NRC1	NBS-LRR protein
novel30	AATCCTTCAGCAATCCATA	9.18694	3.70593	1.28192	Score: 2.5	PGSC0003DMT400073542	PGSC0003DMG402028569	Phosphoglycerate/bisphosphoglycerate mutase	other enzyme
novel30	AATCCTTCAGCAATCCATA	9.18694	3.70593	1.28192	Score: 2.5	PGSC0003DMT400080929	PGSC0003DMG400031521	Tospovirus resistance protein B	R gene
novel30	AATCCTTCAGCAATCCATA	9.18694	3.70593	1.28192	Score: 2.5	PGSC0003DMT400080930	PGSC0003DMG400031521	Tospovirus resistance protein B	R gene
novel30	AATCCTTCAGCAATCCATA	9.18694	3.70593	1.28192	Score: 2.5	PGSC0003DMT400086447	PGSC0003DMG400036018	Gene of unknown function	unknown
novel30	AATCCTTCAGCAATCCATA	9.18694	3.70593	1.28192	Score: 2.5	PGSC0003DMT400086956	PGSC0003DMG400036527	Type I MADS box transcription factor	Transcription factor
novel30	AATCCTTCAGCAATCCATA	9.18694	3.70593	1.28192	Score: 2.5	PGSC0003DMT400087890	PGSC0003DMG400037461	Type I MADS box transcription factor	Transcription factor
novel30	AATCCTTCAGCAATCCATA	9.18694	3.70593	1.28192	Score: 2.5	PGSC0003DMT400090586	PGSC0003DMG400040157	MADS-box protein AGL35	Transcription factor
novel30	AATCCTTCAGCAATCCATA	9.18694	3.70593	1.28192	Score: 2.5	PGSC0003DMT400005150	PGSC0003DMG400002035	Conserved gene of unknown function	unknown
novel30	AATCCTTCAGCAATCCATA	9.18694	3.70593	1.28192	Score: 2.5	PGSC0003DMT400044555	PGSC0003DMG400017296	Conserved gene of unknown function	unknown
novel30	AATCCTTCAGCAATCCATA	9.18694	3.70593	1.28192	Score: 2.0	PGSC0003DMT400005034	PGSC0003DMG400001990	NBS-coding resistance gene analog	NBS-LRR protein
novel30	AATCCTTCAGCAATCCATA	9.18694	3.70593	1.28192	Score: 2.0	PGSC0003DMT400010966	PGSC0003DMG400004295	NBS-LRR protein	NBS-LRR protein
novel30	AATCCTTCAGCAATCCATA	9.18694	3.70593	1.28192	Score: 2.0	PGSC0003DMT400013529	PGSC0003DMG400005284	3-dehydroquinate dehydratase / shikimate dehydrogenase isoform 2	other enzyme
novel30	AATCCTTCAGCAATCCATA	9.18694	3.70593	1.28192	Score: 2.0	PGSC0003DMT400017407	PGSC0003DMG400006769	Leucine-rich repeat containing protein	NBS-LRR protein
novel30	AATCCTTCAGCAATCCATA	9.18694	3.70593	1.28192	Score: 2.0	PGSC0003DMT400017408	PGSC0003DMG400006769	Leucine-rich repeat containing protein	NBS-LRR protein
novel30	AATCCTTCAGCAATCCATA	9.18694	3.70593	1.28192	Score: 2.0	PGSC0003DMT400049437	PGSC0003DMG400019206	ATZW10	other
novel30	AATCCTTCAGCAATCCATA	9.18694	3.70593	1.28192	Score: 2.0	PGSC0003DMT400095417	PGSC0003DMG400044988	Type I MADS box transcription factor	Transcription factor
novel30	AATCCTTCAGCAATCCATA	9.18694	3.70593	1.28192	Score: 2.0	PGSC0003DMT400007569	PGSC0003DMG400002920	RGC1	R gene
novel30	AATCCTTCAGCAATCCATA	9.18694	3.70593	1.28192	Score: 2.0	PGSC0003DMT400007570	PGSC0003DMG400002920	RGC1	R gene
novel30	AATCCTTCAGCAATCCATA	9.18694	3.70593	1.28192	Score: 2.0	PGSC0003DMT400011588	PGSC0003DMG400004561	Late blight resistance protein Rpi-blb2	R gene
novel30	AATCCTTCAGCAATCCATA	9.18694	3.70593	1.28192	Score: 2.0	PGSC0003DMT400011589	PGSC0003DMG400004561	Late blight resistance protein Rpi-blb2	R gene
novel30	AATCCTTCAGCAATCCATA	9.18694	3.70593	1.28192	Score: 2.0	PGSC0003DMT400028264	PGSC0003DMG400010895	Late blight resistance protein Rpi-blb2	R gene
novel30	AATCCTTCAGCAATCCATA	9.18694	3.70593	1.28192	Score: 2.0	PGSC0003DMT400042194	PGSC0003DMG400016372	Resistance protein PSH-RGH7	R gene
novel30	AATCCTTCAGCAATCCATA	9.18694	3.70593	1.28192	Score: 2.0	PGSC0003DMT400042758	PGSC0003DMG400016601	Tospovirus resistance protein A	R gene
novel30	AATCCTTCAGCAATCCATA	9.18694	3.70593	1.28192	Score: 2.0	PGSC0003DMT400047508	PGSC0003DMG400018463	Disease resistance protein	R gene
novel30	AATCCTTCAGCAATCCATA	9.18694	3.70593	1.28192	Score: 2.0	PGSC0003DMT400047907	PGSC0003DMG400018619	Tospovirus resistance protein B	R gene
novel30	AATCCTTCAGCAATCCATA	9.18694	3.70593	1.28192	Score: 2.0	PGSC0003DMT400050805	PGSC0003DMG400019732	Disease resistance protein	R gene
novel30	AATCCTTCAGCAATCCATA	9.18694	3.70593	1.28192	Score: 2.0	PGSC0003DMT400050806	PGSC0003DMG400019732	Disease resistance protein	R gene
novel30	AATCCTTCAGCAATCCATA	9.18694	3.70593	1.28192	Score: 2.0	PGSC0003DMT400050821	PGSC0003DMG400019740	Disease resistance protein	R gene
novel30	AATCCTTCAGCAATCCATA	9.18694	3.70593	1.28192	Score: 2.0	PGSC0003DMT400056552	PGSC0003DMG400021986	Late blight resistance protein Rpi-blb2	R gene
novel30	AATCCTTCAGCAATCCATA	9.18694	3.70593	1.28192	Score: 2.0	PGSC0003DMT400059360	PGSC0003DMG400023062	Disease resistance protein	R gene
novel30	AATCCTTCAGCAATCCATA	9.18694	3.70593	1.28192	Score: 2.0	PGSC0003DMT400059361	PGSC0003DMG400023062	Disease resistance protein	R gene
novel30	AATCCTTCAGCAATCCATA	9.18694	3.70593	1.28192	Score: 2.0	PGSC0003DMT400060798	PGSC0003DMG400023645	Disease resistance protein BS2	R gene
novel30	AATCCTTCAGCAATCCATA	9.18694	3.70593	1.28192	Score: 2.0	PGSC0003DMT400060815	PGSC0003DMG400023656	Resistance protein PSH-RGH6	R gene
novel30	AATCCTTCAGCAATCCATA	9.18694	3.70593	1.28192	Score: 2.0	PGSC0003DMT400075120	PGSC0003DMG400029220	Tospovirus resistance protein A	R gene
novel30	AATCCTTCAGCAATCCATA	9.18694	3.70593	1.28192	Score: 2.0	PGSC0003DMT400093366	PGSC0003DMG400042937	Resistance protein PSH-RGH6	R gene
novel30	AATCCTTCAGCAATCCATA	9.18694	3.70593	1.28192	Score: 2.0	PGSC0003DMT400097581	PGSC0003DMG400047152	Tospovirus resistance protein A	R gene
novel30	AATCCTTCAGCAATCCATA	9.18694	3.70593	1.28192	Score: 2.2	PGSC0003DMT400088816	PGSC0003DMG400038387	Pentatricopeptide repeat-containing protein	growth
novel30	AATCCTTCAGCAATCCATA	9.18694	3.70593	1.28192	Score: 2.2	PGSC0003DMT400013234	PGSC0003DMG400005170	NBS-coding resistance gene analog	NBS-LRR protein
novel30	AATCCTTCAGCAATCCATA	9.18694	3.70593	1.28192	Score: 2.2	PGSC0003DMT400036070	PGSC0003DMG400013891	Resistance protein PSH-RGH6	R gene
novel30	AATCCTTCAGCAATCCATA	9.18694	3.70593	1.28192	Score: 2.2	PGSC0003DMT400044169	PGSC0003DMG400017146	NBS-LRR resistance protein RGH1	NBS-LRR protein
novel30	AATCCTTCAGCAATCCATA	9.18694	3.70593	1.28192	Score: 2.2	PGSC0003DMT400044170	PGSC0003DMG400017146	NBS-LRR resistance protein RGH1	NBS-LRR protein
novel30	AATCCTTCAGCAATCCATA	9.18694	3.70593	1.28192	Score: 2.2	PGSC0003DMT400047451	PGSC0003DMG400018441	Late blight resistance protein	R gene
novel30	AATCCTTCAGCAATCCATA	9.18694	3.70593	1.28192	Score: 2.2	PGSC0003DMT400047577	PGSC0003DMG400018490	NBS-LRR type disease resistance protein	NBS-LRR protein
novel30	AATCCTTCAGCAATCCATA	9.18694	3.70593	1.28192	Score: 2.2	PGSC0003DMT400047578	PGSC0003DMG400018490	NBS-LRR type disease resistance protein	NBS-LRR protein
novel30	AATCCTTCAGCAATCCATA	9.18694	3.70593	1.28192	Score: 2.2	PGSC0003DMT400047579	PGSC0003DMG400018490	NBS-LRR type disease resistance protein	NBS-LRR protein
novel30	AATCCTTCAGCAATCCATA	9.18694	3.70593	1.28192	Score: 2.2	PGSC0003DMT400056288	PGSC0003DMG400021869	Conserved gene of unknown function	unknown
novel30	AATCCTTCAGCAATCCATA	9.18694	3.70593	1.28192	Score: 2.2	PGSC0003DMT400061927	PGSC0003DMG400024100	Conserved gene of unknown function	unknown
novel30	AATCCTTCAGCAATCCATA	9.18694	3.70593	1.28192	Score: 2.2	PGSC0003DMT400075747	PGSC0003DMG400029457	Hero resistance protein	R gene
novel30	AATCCTTCAGCAATCCATA	9.18694	3.70593	1.28192	Score: 2.2	PGSC0003DMT400080647	PGSC0003DMG400031405	NRC1	NBS-LRR protein
novel30	AATCCTTCAGCAATCCATA	9.18694	3.70593	1.28192	Score: 2.2	PGSC0003DMT400080649	PGSC0003DMG400031405	NRC1	NBS-LRR protein
novel30	AATCCTTCAGCAATCCATA	9.18694	3.70593	1.28192	Score: 2.2	PGSC0003DMT400092322	PGSC0003DMG400041893	F-box family protein	Transcription factor
novel30	AATCCTTCAGCAATCCATA	9.18694	3.70593	1.28192	Score: 1.0	PGSC0003DMT400008029	PGSC0003DMG400003104	NBS-LRR resistance protein	NBS-LRR protein
novel30	AATCCTTCAGCAATCCATA	9.18694	3.70593	1.28192	Score: 1.8	PGSC0003DMT400019326	PGSC0003DMG400007469	NRC1	NBS-LRR protein
novel30	AATCCTTCAGCAATCCATA	9.18694	3.70593	1.28192	Score: 1.8	PGSC0003DMT400019327	PGSC0003DMG400007469	NRC1	NBS-LRR protein
novel30	AATCCTTCAGCAATCCATA	9.18694	3.70593	1.28192	Score: 1.0	PGSC0003DMT400033634	PGSC0003DMG400012918	Cc-nbs-lrr resistance protein	NBS-LRR protein
novel30	AATCCTTCAGCAATCCATA	9.18694	3.70593	1.28192	Score: 1.0	PGSC0003DMT400033635	PGSC0003DMG400012918	Cc-nbs-lrr resistance protein	NBS-LRR protein
novel30	AATCCTTCAGCAATCCATA	9.18694	3.70593	1.28192	Score: 1.0	PGSC0003DMT400033636	PGSC0003DMG400012918	Cc-nbs-lrr resistance protein	NBS-LRR protein
novel30	AATCCTTCAGCAATCCATA	9.18694	3.70593	1.28192	Score: 1.2	PGSC0003DMT400082452	PGSC0003DMG402032547	HJTR2GH1 protein	NBS-LRR protein
novel30	AATCCTTCAGCAATCCATA	9.18694	3.70593	1.28192	Score: 1.2	PGSC0003DMT400030031	PGSC0003DMG400011524	EDNR2GH3 protein	other
novel30	AATCCTTCAGCAATCCATA	9.18694	3.70593	1.28192	Score: 1.5	PGSC0003DMT400005017	PGSC0003DMG401001984	Disease resistance protein BS2	R gene
novel30	AATCCTTCAGCAATCCATA	9.18694	3.70593	1.28192	Score: 1.2	PGSC0003DMT400006290	PGSC0003DMG400002457	Late blight resistance protein Rpi-blb2	R gene
novel30	AATCCTTCAGCAATCCATA	9.18694	3.70593	1.28192	Score: 1.8	PGSC0003DMT400014227	PGSC0003DMG400005577	NB-ARC domain containing protein	R gene
novel30	AATCCTTCAGCAATCCATA	9.18694	3.70593	1.28192	Score: 1.8	PGSC0003DMT400014228	PGSC0003DMG400005577	NB-ARC domain containing protein	R gene
novel30	AATCCTTCAGCAATCCATA	9.18694	3.70593	1.28192	Score: 1.5	PGSC0003DMT400015307	PGSC0003DMG400005970	Late blight resistance protein	R gene
novel30	AATCCTTCAGCAATCCATA	9.18694	3.70593	1.28192	Score: 1.5	PGSC0003DMT400015308	PGSC0003DMG400005970	Late blight resistance protein	R gene
novel30	AATCCTTCAGCAATCCATA	9.18694	3.70593	1.28192	Score: 1.0	PGSC0003DMT400016087	PGSC0003DMG402006288	Tospovirus resistance protein B	R gene
novel30	AATCCTTCAGCAATCCATA	9.18694	3.70593	1.28192	Score: 1.5	PGSC0003DMT400016802	PGSC0003DMG400006573	Tospovirus resistance protein A	R gene
novel30	AATCCTTCAGCAATCCATA	9.18694	3.70593	1.28192	Score: 1.5	PGSC0003DMT400016803	PGSC0003DMG400006573	Tospovirus resistance protein A	R gene
novel30	AATCCTTCAGCAATCCATA	9.18694	3.70593	1.28192	Score: 0.0	PGSC0003DMT400016828	PGSC0003DMG400006581	Tospovirus resistance protein A	R gene
novel30	AATCCTTCAGCAATCCATA	9.18694	3.70593	1.28192	Score: 1.5	PGSC0003DMT400025433	PGSC0003DMG401009818	Disease resistance protein BS2	R gene
novel30	AATCCTTCAGCAATCCATA	9.18694	3.70593	1.28192	Score: 1.5	PGSC0003DMT400025436	PGSC0003DMG402009818	RGC1	R gene
novel30	AATCCTTCAGCAATCCATA	9.18694	3.70593	1.28192	Score: 1.5	PGSC0003DMT400025437	PGSC0003DMG402009818	RGC1	R gene
novel30	AATCCTTCAGCAATCCATA	9.18694	3.70593	1.28192	Score: 1.5	PGSC0003DMT400025438	PGSC0003DMG402009818	RGC1	R gene
novel30	AATCCTTCAGCAATCCATA	9.18694	3.70593	1.28192	Score: 1.5	PGSC0003DMT400025439	PGSC0003DMG402009818	RGC1	R gene
novel30	AATCCTTCAGCAATCCATA	9.18694	3.70593	1.28192	Score: 1.5	PGSC0003DMT400025440	PGSC0003DMG401009819	Resistance protein PSH-RGH6	R gene
novel30	AATCCTTCAGCAATCCATA	9.18694	3.70593	1.28192	Score: 0.0	PGSC0003DMT400031059	PGSC0003DMG400011898	Tospovirus resistance protein B	R gene
novel30	AATCCTTCAGCAATCCATA	9.18694	3.70593	1.28192	Score: 0.0	PGSC0003DMT400031066	PGSC0003DMG400011900	Tospovirus resistance protein B	R gene
novel30	AATCCTTCAGCAATCCATA	9.18694	3.70593	1.28192	Score: 0.0	PGSC0003DMT400042754	PGSC0003DMG400016600	Tospovirus resistance protein E	R gene
novel30	AATCCTTCAGCAATCCATA	9.18694	3.70593	1.28192	Score: 1.5	PGSC0003DMT400042758	PGSC0003DMG400016601	Tospovirus resistance protein A	R gene
novel30	AATCCTTCAGCAATCCATA	9.18694	3.70593	1.28192	Score: 1.0	PGSC0003DMT400042779	PGSC0003DMG402016602	Tospovirus resistance protein C	R gene
novel30	AATCCTTCAGCAATCCATA	9.18694	3.70593	1.28192	Score: 1.5	PGSC0003DMT400050509	PGSC0003DMG400019627	Disease resistance protein Gpa2	R gene
novel30	AATCCTTCAGCAATCCATA	9.18694	3.70593	1.28192	Score: 1.5	PGSC0003DMT400050510	PGSC0003DMG400019627	Disease resistance protein Gpa2	R gene
novel30	AATCCTTCAGCAATCCATA	9.18694	3.70593	1.28192	Score: 1.5	PGSC0003DMT400051415	PGSC0003DMG400019970	RGC1	R gene
novel30	AATCCTTCAGCAATCCATA	9.18694	3.70593	1.28192	Score: 1.0	PGSC0003DMT400053473	PGSC0003DMG400020741	Late blight resistance protein Rpi-blb2	R gene
novel30	AATCCTTCAGCAATCCATA	9.18694	3.70593	1.28192	Score: 1.5	PGSC0003DMT400058642	PGSC0003DMG401022784	Resistance protein PSH-RGH6	R gene
novel30	AATCCTTCAGCAATCCATA	9.18694	3.70593	1.28192	Score: 1.5	PGSC0003DMT400058647	PGSC0003DMG400022785	Resistance protein PSH-RGH6	R gene
novel30	AATCCTTCAGCAATCCATA	9.18694	3.70593	1.28192	Score: 1.5	PGSC0003DMT400062184	PGSC0003DMG400024203	Disease resistance protein BS2	R gene
novel30	AATCCTTCAGCAATCCATA	9.18694	3.70593	1.28192	Score: 1.5	PGSC0003DMT400062185	PGSC0003DMG400024203	Disease resistance protein BS2	R gene
novel30	AATCCTTCAGCAATCCATA	9.18694	3.70593	1.28192	Score: 1.8	PGSC0003DMT400075763	PGSC0003DMG400029460	Hero resistance protein	R gene
novel30	AATCCTTCAGCAATCCATA	9.18694	3.70593	1.28192	Score: 1.5	PGSC0003DMT400088449	PGSC0003DMG400038020	Disease resistance protein BS2	R gene
novel35	AATGTTCAGACGTGTATTCAGATT	4.92754	4.431	2.67067	Score: 2.0	PGSC0003DMT400014530	PGSC0003DMG400005689	Receptor protein kinase	kinase
novel39	ACCAAGGAGTCTGACATG	11.0243	6.84791	3.09798	Score: 2.5	PGSC0003DMT400039236	PGSC0003DMG400015171	ATP binding protein	other
novel39	ACCAAGGAGTCTGACATG	11.0243	6.84791	3.09798	Score: 2.5	PGSC0003DMT400039237	PGSC0003DMG400015171	ATP binding protein	other
novel39	ACCAAGGAGTCTGACATG	11.0243	6.84791	3.09798	Score: 2.5	PGSC0003DMT400047364	PGSC0003DMG400018405	Transferase, transferring glycosyl groups	other
novel39	ACCAAGGAGTCTGACATG	11.0243	6.84791	3.09798	Score: 2.5	PGSC0003DMT400047365	PGSC0003DMG400018405	Transferase, transferring glycosyl groups	other
novel39	ACCAAGGAGTCTGACATG	11.0243	6.84791	3.09798	Score: 2.5	PGSC0003DMT400067403	PGSC0003DMG400026199	Beta-amylase	cell wall and Membrane
novel39	ACCAAGGAGTCTGACATG	11.0243	6.84791	3.09798	Score: 2.5	PGSC0003DMT400067405	PGSC0003DMG400026199	Beta-amylase	cell wall and Membrane
novel39	ACCAAGGAGTCTGACATG	11.0243	6.84791	3.09798	Score: 2.5	PGSC0003DMT400041628	PGSC0003DMG400016138	Phosphatidylinositol glycan	cell wall and Membrane
novel39	ACCAAGGAGTCTGACATG	11.0243	6.84791	3.09798	Score: 2.5	PGSC0003DMT400063452	PGSC0003DMG400024690	Lipoxygenase	growth
novel39	ACCAAGGAGTCTGACATG	11.0243	6.84791	3.09798	Score: 2.5	PGSC0003DMT400063461	PGSC0003DMG401024691	Lipoxygenase	growth
novel39	ACCAAGGAGTCTGACATG	11.0243	6.84791	3.09798	Score: 2.5	PGSC0003DMT400004354	PGSC0003DMG400001725	Pentatricopeptide repeat-containing protein	growth
novel39	ACCAAGGAGTCTGACATG	11.0243	6.84791	3.09798	Score: 2.5	PGSC0003DMT400005678	PGSC0003DMG400002226	Protein pim1	growth
novel39	ACCAAGGAGTCTGACATG	11.0243	6.84791	3.09798	Score: 2.5	PGSC0003DMT400005679	PGSC0003DMG400002226	Protein pim1	growth
novel39	ACCAAGGAGTCTGACATG	11.0243	6.84791	3.09798	Score: 2.5	PGSC0003DMT400054180	PGSC0003DMG400021011	Ethylene-responsive nuclear protein	hormone response
novel39	ACCAAGGAGTCTGACATG	11.0243	6.84791	3.09798	Score: 2.5	PGSC0003DMT400064535	PGSC0003DMG400025076	Leucine-rich repeat receptor protein kinase EXS	kinase
novel39	ACCAAGGAGTCTGACATG	11.0243	6.84791	3.09798	Score: 2.5	PGSC0003DMT400066707	PGSC0003DMG400025922	LRR receptor kinase	kinase
novel39	ACCAAGGAGTCTGACATG	11.0243	6.84791	3.09798	Score: 2.5	PGSC0003DMT400073284	PGSC0003DMG400028476	Nucleobase ascorbate transporter	NBS-LRR protein
novel39	ACCAAGGAGTCTGACATG	11.0243	6.84791	3.09798	Score: 2.5	PGSC0003DMT400034726	PGSC0003DMG400013342	Caffeic acid O-methyltransferase II	secondary product
novel39	ACCAAGGAGTCTGACATG	11.0243	6.84791	3.09798	Score: 2.5	PGSC0003DMT400056813	PGSC0003DMG400022096	Ubiquitin carrier protein	Ubiquitin
novel39	ACCAAGGAGTCTGACATG	11.0243	6.84791	3.09798	Score: 2.5	PGSC0003DMT400056814	PGSC0003DMG400022096	Ubiquitin carrier protein	Ubiquitin
novel39	ACCAAGGAGTCTGACATG	11.0243	6.84791	3.09798	Score: 2.5	PGSC0003DMT400060047	PGSC0003DMG400023362	Alcohol dehydrogenase	other enzyme
novel39	ACCAAGGAGTCTGACATG	11.0243	6.84791	3.09798	Score: 2.5	PGSC0003DMT400060048	PGSC0003DMG400023362	Alcohol dehydrogenase	other enzyme
novel39	ACCAAGGAGTCTGACATG	11.0243	6.84791	3.09798	Score: 2.5	PGSC0003DMT400070159	PGSC0003DMG402027271	Catechol O-methyltransferase	secondary product
novel39	ACCAAGGAGTCTGACATG	11.0243	6.84791	3.09798	Score: 2.5	PGSC0003DMT400070160	PGSC0003DMG402027271	Catechol O-methyltransferase	secondary product
novel39	ACCAAGGAGTCTGACATG	11.0243	6.84791	3.09798	Score: 2.5	PGSC0003DMT400010923	PGSC0003DMG400004278	Conserved gene of unknown function	unknown
novel39	ACCAAGGAGTCTGACATG	11.0243	6.84791	3.09798	Score: 2.5	PGSC0003DMT400010924	PGSC0003DMG400004278	Conserved gene of unknown function	unknown
novel39	ACCAAGGAGTCTGACATG	11.0243	6.84791	3.09798	Score: 2.5	PGSC0003DMT400018729	PGSC0003DMG400007260	Conserved gene of unknown function	unknown
novel39	ACCAAGGAGTCTGACATG	11.0243	6.84791	3.09798	Score: 2.5	PGSC0003DMT400045245	PGSC0003DMG401017555	Conserved gene of unknown function	unknown
novel39	ACCAAGGAGTCTGACATG	11.0243	6.84791	3.09798	Score: 2.5	PGSC0003DMT400070582	PGSC0003DMG400027433	Conserved gene of unknown function	unknown
novel39	ACCAAGGAGTCTGACATG	11.0243	6.84791	3.09798	Score: 2.0	PGSC0003DMT400036052	PGSC0003DMG400013887	Conserved gene of unknown function	unknown
novel39	ACCAAGGAGTCTGACATG	11.0243	6.84791	3.09798	Score: 2.0	PGSC0003DMT400036055	PGSC0003DMG400013887	Conserved gene of unknown function	unknown
novel39	ACCAAGGAGTCTGACATG	11.0243	6.84791	3.09798	Score: 0.5	PGSC0003DMT400077759	PGSC0003DMG400030250	CHK1 checkpoint	growth
novel39	ACCAAGGAGTCTGACATG	11.0243	6.84791	3.09798	Score: 0.0	PGSC0003DMT400092742	PGSC0003DMG400042313	Conserved gene of unknown function	unknown
novel39	ACCAAGGAGTCTGACATG	11.0243	6.84791	3.09798	Score: 0.0	PGSC0003DMT400096705	PGSC0003DMG400046276	Conserved gene of unknown function	unknown
novel43	ACGTGTGTCTATTTGTTCAACTTT	0.835176	0.966764	1.1751	Score: 2.5	PGSC0003DMT400010658	PGSC0003DMG400004163	Conserved gene of unknown function	unknown
novel44	ACTAATAAAAACTGTGCTCTC	0.918694	0.644509	0	Score: 2.5	PGSC0003DMT400060185	PGSC0003DMG400023411	Nitrilase and fragile histidine triad fusion protein	other
novel44	ACTAATAAAAACTGTGCTCTC	0.918694	0.644509	0	Score: 2.5	PGSC0003DMT400016187	PGSC0003DMG400006326	DC1 domain containing protein	growth
novel46	ACTGACAGAAGAGAGTGAGC	9.01991	3.46424	1.38875	Score: 2.5	PGSC0003DMT400029750	PGSC0003DMG400011433	Promoter-binding protein SPL9	other
novel46	ACTGACAGAAGAGAGTGAGC	9.01991	3.46424	1.38875	Score: 2.5	PGSC0003DMT400029751	PGSC0003DMG400011433	Promoter-binding protein SPL9	other
novel46	ACTGACAGAAGAGAGTGAGC	9.01991	3.46424	1.38875	Score: 2.5	PGSC0003DMT400056372	PGSC0003DMG400021902	Squamosa promoter-binding protein	other
novel46	ACTGACAGAAGAGAGTGAGC	9.01991	3.46424	1.38875	Score: 2.5	PGSC0003DMT400056373	PGSC0003DMG400021902	Squamosa promoter-binding protein	other
novel46	ACTGACAGAAGAGAGTGAGC	9.01991	3.46424	1.38875	Score: 2.5	PGSC0003DMT400056374	PGSC0003DMG400021902	Squamosa promoter-binding protein	other
novel46	ACTGACAGAAGAGAGTGAGC	9.01991	3.46424	1.38875	Score: 2.5	PGSC0003DMT400026497	PGSC0003DMG400010227	Alpha galactosidase	cell wall and Membrane
novel46	ACTGACAGAAGAGAGTGAGC	9.01991	3.46424	1.38875	Score: 2.5	PGSC0003DMT400012383	PGSC0003DMG400004853	Phospholipid-transporting ATPase	cell wall and Membrane
novel46	ACTGACAGAAGAGAGTGAGC	9.01991	3.46424	1.38875	Score: 2.5	PGSC0003DMT400059813	PGSC0003DMG400023260	LIGULELESS1 protein	growth
novel46	ACTGACAGAAGAGAGTGAGC	9.01991	3.46424	1.38875	Score: 2.5	PGSC0003DMT400063045	PGSC0003DMG400024527	LIGULELESS1 protein	growth
novel46	ACTGACAGAAGAGAGTGAGC	9.01991	3.46424	1.38875	Score: 2.5	PGSC0003DMT400063046	PGSC0003DMG400024527	LIGULELESS1 protein	growth
novel46	ACTGACAGAAGAGAGTGAGC	9.01991	3.46424	1.38875	Score: 2.5	PGSC0003DMT400068752	PGSC0003DMG400026736	LIGULELESS1 protein	growth
novel46	ACTGACAGAAGAGAGTGAGC	9.01991	3.46424	1.38875	Score: 2.5	PGSC0003DMT400084734	PGSC0003DMG400034310	LIGULELESS1 protein	growth
novel46	ACTGACAGAAGAGAGTGAGC	9.01991	3.46424	1.38875	Score: 2.5	PGSC0003DMT400040886	PGSC0003DMG400015814	Receptor protein kinase CLAVATA1	kinase
novel46	ACTGACAGAAGAGAGTGAGC	9.01991	3.46424	1.38875	Score: 2.0	PGSC0003DMT400069873	PGSC0003DMG400027171	Conserved gene of unknown function	unknown
novel46	ACTGACAGAAGAGAGTGAGC	9.01991	3.46424	1.38875	Score: 1.5	PGSC0003DMT400072745	PGSC0003DMG400028308	LIGULELESS1 protein	growth
novel46	ACTGACAGAAGAGAGTGAGC	9.01991	3.46424	1.38875	Score: 1.5	PGSC0003DMT400072746	PGSC0003DMG400028308	LIGULELESS1 protein	growth
novel47	ACTGCACTTGACAACTATGGC	0.501106	0.563946	0.320481	Score: 2.5	PGSC0003DMT400081314	PGSC0003DMG400031792	Endo-1,4-beta-glucanase	cell wall and Membrane
novel48	AGAGTTGCGATTTTTATGAAAAGT	0.751659	0	0.534135	Score: 1.5	PGSC0003DMT400019842	PGSC0003DMG400007674	Gene of unknown function	unknown
novel49	AGAGTTGCGATTTTTATGAAGAGT	0.835176	0.563946	0	Score: 2.5	PGSC0003DMT400019842	PGSC0003DMG400007674	Gene of unknown function	unknown
novel5	AAAATAATAAAAGTGTGCTCTCTC	1.00221	0.8862	0.640962	Score: 2.5	PGSC0003DMT400093456	PGSC0003DMG400043027	Isoform 2 of UPF0496 protein	other
novel57	AGTGGTCTCCTTATATGGACTTGG	0.751659	0.402818	0.427308	Score: 2.5	PGSC0003DMT400015325	PGSC0003DMG400005976	Chaperone protein dnaJ 15	other
novel61	ATACCGATTCGATCCGAGC	0	0.725073	0.427308	Score: 2.5	PGSC0003DMT400010014	PGSC0003DMG400003924	Amino acid binding protein	other
novel61	ATACCGATTCGATCCGAGC	0	0.725073	0.427308	Score: 2.5	PGSC0003DMT400054674	PGSC0003DMG400021217	Conserved gene of unknown function	unknown
novel65	ATCCTCTGTCATACTTTTGGGAC	0	0.966764	0.747789	Score: 1.0	PGSC0003DMT400041693	PGSC0003DMG400016165	Conserved gene of unknown function	unknown
novel65	ATCCTCTGTCATACTTTTGGGAC	0	0.966764	0.747789	Score: 1.2	PGSC0003DMT400054365	PGSC0003DMG400021101	Cation-chloride co-transporter	transport related
novel65	ATCCTCTGTCATACTTTTGGGAC	0	0.966764	0.747789	Score: 1.8	PGSC0003DMT400030679	PGSC0003DMG400011753	Uro-adherence factor A	other
novel66	ATCCTTCGTCATACTTTTGGGACA	1.25276	0.966764	0.961443	Score: 1.0	PGSC0003DMT400041693	PGSC0003DMG400016165	Conserved gene of unknown function	unknown
novel67	ATCGAGACGTTGAGTGATGTATCC	1.67035	1.53071	0.747789	Score: 2.5	PGSC0003DMT400074587	PGSC0003DMG400028998	Leukotriene A-4 hydrolase	other
novel7	AAAATTGAACAAGTAGACACAAGT	0.918694	0.644509	0.320481	Score: 2.5	PGSC0003DMT400020634	PGSC0003DMG400007993	Pheromone receptor	hormone response
novel7	AAAATTGAACAAGTAGACACAAGT	0.918694	0.644509	0.320481	Score: 2.2	PGSC0003DMT400015388	PGSC0003DMG400006000	Receptor kinase	kinase
novel71	ATCTCAGATACATGTGAATCCACT	0.751659	0.483382	0	Score: 2.0	PGSC0003DMT400027092	PGSC0003DMG400010451	Gene of unknown function	unknown
novel73	ATGGTATCGTGAGATGGAATCAGT	0.751659	0.483382	0.320481	Score: 1.2	PGSC0003DMT400011106	PGSC0003DMG400004345	Gene of unknown function	unknown
novel8	AAAATTGAACAAGTAGACACATGC	0.668141	0.402818	0.320481	Score: 2.5	PGSC0003DMT400015388	PGSC0003DMG400006000	Receptor kinase	kinase
novel8	AAAATTGAACAAGTAGACACATGC	0.668141	0.402818	0.320481	Score: 2.0	PGSC0003DMT400020634	PGSC0003DMG400007993	Pheromone receptor	hormone response
novel80	ATTCAGGATTTTAAGATGACGGGT	5.26161	4.02818	3.20481	Score: 2.5	PGSC0003DMT400075311	PGSC0003DMG400029288	Conserved gene of unknown function	unknown
novel80	ATTCAGGATTTTAAGATGACGGGT	5.26161	4.02818	3.20481	Score: 2.5	PGSC0003DMT400075312	PGSC0003DMG400029288	Conserved gene of unknown function	unknown
novel80	ATTCAGGATTTTAAGATGACGGGT	5.26161	4.02818	3.20481	Score: 2.5	PGSC0003DMT400075313	PGSC0003DMG400029288	Conserved gene of unknown function	unknown
novel85	ATTGTTGCTCATGGGATGGAG	1.25276	0.402818	0	Score: 2.5	PGSC0003DMT400006150	PGSC0003DMG400002392	Auxin response factor 7	hormone response
novel85	ATTGTTGCTCATGGGATGGAG	1.25276	0.402818	0	Score: 2.5	PGSC0003DMT400006151	PGSC0003DMG400002392	Auxin response factor 7	hormone response
novel85	ATTGTTGCTCATGGGATGGAG	1.25276	0.402818	0	Score: 2.2	PGSC0003DMT400013037	PGSC0003DMG400005082	Beta-glucosidase	cell wall and Membrane
novel85	ATTGTTGCTCATGGGATGGAG	1.25276	0.402818	0	Score: 2.2	PGSC0003DMT400008114	PGSC0003DMG400003128	CRS1 / YhbY domain containing protein	other
novel86	ATTTAAAGGTTGTGGGTGCTCACT	1.25276	0.725073	0	Score: 2.5	PGSC0003DMT400003261	PGSC0003DMG400001291	Conserved gene of unknown function	unknown
novel88	ATTTTCATGGGGATTAGTATG	1.67035	1.53071	0.640962	Score: 2.5	PGSC0003DMT400035187	PGSC0003DMG400013524	Protein kinase family protein	kinase
novel88	ATTTTCATGGGGATTAGTATG	1.67035	1.53071	0.640962	Score: 2.5	PGSC0003DMT400035190	PGSC0003DMG400013524	Protein kinase family protein	kinase
novel88	ATTTTCATGGGGATTAGTATG	1.67035	1.53071	0.640962	Score: 2.5	PGSC0003DMT400035191	PGSC0003DMG400013524	Protein kinase family protein	kinase
novel88	ATTTTCATGGGGATTAGTATG	1.67035	1.53071	0.640962	Score: 2.5	PGSC0003DMT400009794	PGSC0003DMG400003834	F-box protein	Transcription factor
novel88	ATTTTCATGGGGATTAGTATG	1.67035	1.53071	0.640962	Score: 2.5	PGSC0003DMT400058829	PGSC0003DMG400022858	F-box family protein	Transcription factor
novel88	ATTTTCATGGGGATTAGTATG	1.67035	1.53071	0.640962	Score: 2.5	PGSC0003DMT400006741	PGSC0003DMG400002618	Conserved gene of unknown function	unknown
novel88	ATTTTCATGGGGATTAGTATG	1.67035	1.53071	0.640962	Score: 2.5	PGSC0003DMT400006742	PGSC0003DMG400002618	Conserved gene of unknown function	unknown
novel88	ATTTTCATGGGGATTAGTATG	1.67035	1.53071	0.640962	Score: 2.5	PGSC0003DMT400041779	PGSC0003DMG400016206	Conserved gene of unknown function	unknown
novel88	ATTTTCATGGGGATTAGTATG	1.67035	1.53071	0.640962	Score: 2.5	PGSC0003DMT400041781	PGSC0003DMG400016206	Conserved gene of unknown function	unknown
novel88	ATTTTCATGGGGATTAGTATG	1.67035	1.53071	0.640962	Score: 2.0	PGSC0003DMT400019862	PGSC0003DMG400007683	Sulfate/bicarbonate/oxalate exchanger and transporter sat-1	other
novel88	ATTTTCATGGGGATTAGTATG	1.67035	1.53071	0.640962	Score: 2.0	PGSC0003DMT400019863	PGSC0003DMG400007683	Sulfate/bicarbonate/oxalate exchanger and transporter sat-1	other
novel88	ATTTTCATGGGGATTAGTATG	1.67035	1.53071	0.640962	Score: 2.2	PGSC0003DMT400046268	PGSC0003DMG402017962	ATP binding / microtubule motor	other
novel88	ATTTTCATGGGGATTAGTATG	1.67035	1.53071	0.640962	Score: 2.2	PGSC0003DMT400002988	PGSC0003DMG400001176	Gene of unknown function	unknown
novel89	ATTTTCCTTGGGATTAGTATG	1.25276	0.644509	0.427308	Score: 2.5	PGSC0003DMT400092233	PGSC0003DMG400041804	Dentin sialophosphoprotein	other
novel89	ATTTTCCTTGGGATTAGTATG	1.25276	0.644509	0.427308	Score: 2.5	PGSC0003DMT400000320	PGSC0003DMG400000108	Eukaryotic translation initiation factor 3 subunit	other
novel89	ATTTTCCTTGGGATTAGTATG	1.25276	0.644509	0.427308	Score: 2.5	PGSC0003DMT400004034	PGSC0003DMG400001593	Protein translocase	other
novel89	ATTTTCCTTGGGATTAGTATG	1.25276	0.644509	0.427308	Score: 2.5	PGSC0003DMT400004035	PGSC0003DMG400001593	Protein translocase	other
novel89	ATTTTCCTTGGGATTAGTATG	1.25276	0.644509	0.427308	Score: 2.5	PGSC0003DMT400004036	PGSC0003DMG400001593	Protein translocase	other
novel89	ATTTTCCTTGGGATTAGTATG	1.25276	0.644509	0.427308	Score: 2.5	PGSC0003DMT400052885	PGSC0003DMG400020519	Synaptonemal complex protein	other
novel89	ATTTTCCTTGGGATTAGTATG	1.25276	0.644509	0.427308	Score: 2.5	PGSC0003DMT400052886	PGSC0003DMG400020519	Synaptonemal complex protein	other
novel89	ATTTTCCTTGGGATTAGTATG	1.25276	0.644509	0.427308	Score: 2.5	PGSC0003DMT400086155	PGSC0003DMG400035726	Ulp1 protease family, C-terminal catalytic domain containing protein	other
novel89	ATTTTCCTTGGGATTAGTATG	1.25276	0.644509	0.427308	Score: 2.5	PGSC0003DMT400009330	PGSC0003DMG400003626	Lactoylglutathione lyase	cell wall and Membrane
novel89	ATTTTCCTTGGGATTAGTATG	1.25276	0.644509	0.427308	Score: 2.5	PGSC0003DMT400027154	PGSC0003DMG400010475	Plasma membrane intrinsic protein 2-1	cell wall and Membrane
novel89	ATTTTCCTTGGGATTAGTATG	1.25276	0.644509	0.427308	Score: 2.5	PGSC0003DMT400019156	PGSC0003DMG400007412	ABC transporter B family member 21	transport related
novel89	ATTTTCCTTGGGATTAGTATG	1.25276	0.644509	0.427308	Score: 2.5	PGSC0003DMT400059497	PGSC0003DMG401023116	Cyclase family protein	other enzyme
novel89	ATTTTCCTTGGGATTAGTATG	1.25276	0.644509	0.427308	Score: 2.0	PGSC0003DMT400015267	PGSC0003DMG400005956	Auxin efflux carrier	hormone response
novel89	ATTTTCCTTGGGATTAGTATG	1.25276	0.644509	0.427308	Score: 1.5	PGSC0003DMT400003484	PGSC0003DMG400001378	MADS-box transcription factor FBP29	Transcription factor
novel89	ATTTTCCTTGGGATTAGTATG	1.25276	0.644509	0.427308	Score: 1.5	PGSC0003DMT400003485	PGSC0003DMG400001378	MADS-box transcription factor FBP29	Transcription factor
novel9	AAAATTGAACAAGTAGACACGTGT	1.58684	0.805637	0.854616	Score: 2.2	PGSC0003DMT400015388	PGSC0003DMG400006000	Receptor kinase	kinase
novel9	AAAATTGAACAAGTAGACACGTGT	1.58684	0.805637	0.854616	Score: 2.2	PGSC0003DMT400020634	PGSC0003DMG400007993	Pheromone receptor	hormone response
novel91	CATTGGACTCTGAATCCA	2.67256	1.69184	0.427308	Score: 2.5	PGSC0003DMT400097087	PGSC0003DMG400046658	Integrase core domain containing protein	other
novel91	CATTGGACTCTGAATCCA	2.67256	1.69184	0.427308	Score: 2.5	PGSC0003DMT400006600	PGSC0003DMG400002568	TATA binding protein associated factor	other
novel91	CATTGGACTCTGAATCCA	2.67256	1.69184	0.427308	Score: 2.5	PGSC0003DMT400006601	PGSC0003DMG400002568	TATA binding protein associated factor	other
novel91	CATTGGACTCTGAATCCA	2.67256	1.69184	0.427308	Score: 2.5	PGSC0003DMT400086606	PGSC0003DMG400036177	With no lysine kinase	other
novel91	CATTGGACTCTGAATCCA	2.67256	1.69184	0.427308	Score: 2.5	PGSC0003DMT400027996	PGSC0003DMG400010794	Cellulose synthase	cell wall and Membrane
novel91	CATTGGACTCTGAATCCA	2.67256	1.69184	0.427308	Score: 2.5	PGSC0003DMT400017056	PGSC0003DMG400006660	Cellulose synthase catalytic subunit	cell wall and Membrane
novel91	CATTGGACTCTGAATCCA	2.67256	1.69184	0.427308	Score: 2.5	PGSC0003DMT400031570	PGSC0003DMG400012112	Glucan endo-1,3-beta-glucosidase	cell wall and Membrane
novel91	CATTGGACTCTGAATCCA	2.67256	1.69184	0.427308	Score: 2.5	PGSC0003DMT400088007	PGSC0003DMG400037578	Cytochrome P450 85A3	growth
novel91	CATTGGACTCTGAATCCA	2.67256	1.69184	0.427308	Score: 2.5	PGSC0003DMT400026059	PGSC0003DMG400010054	Pentatricopeptide repeat-containing protein	growth
novel91	CATTGGACTCTGAATCCA	2.67256	1.69184	0.427308	Score: 2.5	PGSC0003DMT400061538	PGSC0003DMG400023950	SNF2 domain-containing protein	growth
novel91	CATTGGACTCTGAATCCA	2.67256	1.69184	0.427308	Score: 2.5	PGSC0003DMT400061539	PGSC0003DMG400023950	SNF2 domain-containing protein	growth
novel91	CATTGGACTCTGAATCCA	2.67256	1.69184	0.427308	Score: 2.5	PGSC0003DMT400061540	PGSC0003DMG400023950	SNF2 domain-containing protein	growth
novel91	CATTGGACTCTGAATCCA	2.67256	1.69184	0.427308	Score: 2.5	PGSC0003DMT400069492	PGSC0003DMG402027015	Stigma-specific Stig1 family protein	growth
novel91	CATTGGACTCTGAATCCA	2.67256	1.69184	0.427308	Score: 2.5	PGSC0003DMT400054599	PGSC0003DMG400021186	Kinase	kinase
novel91	CATTGGACTCTGAATCCA	2.67256	1.69184	0.427308	Score: 2.5	PGSC0003DMT400077419	PGSC0003DMG400030113	Leucine-rich repeat receptor kinase	kinase
novel91	CATTGGACTCTGAATCCA	2.67256	1.69184	0.427308	Score: 2.5	PGSC0003DMT400077420	PGSC0003DMG400030113	Leucine-rich repeat receptor kinase	kinase
novel91	CATTGGACTCTGAATCCA	2.67256	1.69184	0.427308	Score: 2.5	PGSC0003DMT400077438	PGSC0003DMG400030117	Leucine-rich repeat receptor kinase	kinase
novel91	CATTGGACTCTGAATCCA	2.67256	1.69184	0.427308	Score: 2.5	PGSC0003DMT400072158	PGSC0003DMG401028079	N-acetylglucosamine kinase	kinase
novel91	CATTGGACTCTGAATCCA	2.67256	1.69184	0.427308	Score: 2.5	PGSC0003DMT400082359	PGSC0003DMG400032498	Protein kinase	kinase
novel91	CATTGGACTCTGAATCCA	2.67256	1.69184	0.427308	Score: 2.5	PGSC0003DMT400082361	PGSC0003DMG400032498	Protein kinase	kinase
novel91	CATTGGACTCTGAATCCA	2.67256	1.69184	0.427308	Score: 2.5	PGSC0003DMT400082362	PGSC0003DMG400032498	Protein kinase	kinase
novel91	CATTGGACTCTGAATCCA	2.67256	1.69184	0.427308	Score: 2.5	PGSC0003DMT400082363	PGSC0003DMG400032498	Protein kinase	kinase
novel91	CATTGGACTCTGAATCCA	2.67256	1.69184	0.427308	Score: 2.5	PGSC0003DMT400095910	PGSC0003DMG400045481	Protein kinase	kinase
novel91	CATTGGACTCTGAATCCA	2.67256	1.69184	0.427308	Score: 2.5	PGSC0003DMT400077423	PGSC0003DMG401030114	Serine-threonine protein kinase, plant-type	kinase
novel91	CATTGGACTCTGAATCCA	2.67256	1.69184	0.427308	Score: 2.5	PGSC0003DMT400077424	PGSC0003DMG401030114	Serine-threonine protein kinase, plant-type	kinase
novel91	CATTGGACTCTGAATCCA	2.67256	1.69184	0.427308	Score: 2.5	PGSC0003DMT400077427	PGSC0003DMG402030114	Serine-threonine protein kinase, plant-type	kinase
novel91	CATTGGACTCTGAATCCA	2.67256	1.69184	0.427308	Score: 2.5	PGSC0003DMT400047451	PGSC0003DMG400018441	Late blight resistance protein	R gene
novel91	CATTGGACTCTGAATCCA	2.67256	1.69184	0.427308	Score: 2.5	PGSC0003DMT400007015	PGSC0003DMG400002710	Transcription factor	Transcription factor
novel91	CATTGGACTCTGAATCCA	2.67256	1.69184	0.427308	Score: 2.5	PGSC0003DMT400007016	PGSC0003DMG400002710	Transcription factor	Transcription factor
novel91	CATTGGACTCTGAATCCA	2.67256	1.69184	0.427308	Score: 2.5	PGSC0003DMT400009287	PGSC0003DMG400003605	Dihydroflavonol 4-reductase	secondary product
novel91	CATTGGACTCTGAATCCA	2.67256	1.69184	0.427308	Score: 2.5	PGSC0003DMT400012931	PGSC0003DMG400005039	Monosaccharid transporter	secondary product
novel91	CATTGGACTCTGAATCCA	2.67256	1.69184	0.427308	Score: 2.5	PGSC0003DMT400012932	PGSC0003DMG400005039	Monosaccharid transporter	secondary product
novel91	CATTGGACTCTGAATCCA	2.67256	1.69184	0.427308	Score: 2.5	PGSC0003DMT400015774	PGSC0003DMG401006167	26S proteasome non-ATPase regulatory subunit 3	other enzyme
novel91	CATTGGACTCTGAATCCA	2.67256	1.69184	0.427308	Score: 2.5	PGSC0003DMT400015776	PGSC0003DMG401006167	26S proteasome non-ATPase regulatory subunit 3	other enzyme
novel91	CATTGGACTCTGAATCCA	2.67256	1.69184	0.427308	Score: 2.5	PGSC0003DMT400034066	PGSC0003DMG400013092	Transcription factor	Transcription factor
novel91	CATTGGACTCTGAATCCA	2.67256	1.69184	0.427308	Score: 2.5	PGSC0003DMT400045515	PGSC0003DMG401017657	Transporter	transport related
novel91	CATTGGACTCTGAATCCA	2.67256	1.69184	0.427308	Score: 2.5	PGSC0003DMT400045516	PGSC0003DMG401017657	Transporter	transport related
novel91	CATTGGACTCTGAATCCA	2.67256	1.69184	0.427308	Score: 2.5	PGSC0003DMT400045517	PGSC0003DMG401017657	Transporter	transport related
novel91	CATTGGACTCTGAATCCA	2.67256	1.69184	0.427308	Score: 2.5	PGSC0003DMT400049070	PGSC0003DMG400019073	Gene of unknown function	unknown
novel91	CATTGGACTCTGAATCCA	2.67256	1.69184	0.427308	Score: 2.5	PGSC0003DMT400084862	PGSC0003DMG400034433	Gene of unknown function	unknown
novel91	CATTGGACTCTGAATCCA	2.67256	1.69184	0.427308	Score: 2.5	PGSC0003DMT400071856	PGSC0003DMG401027957	Conserved gene of unknown function	unknown
novel91	CATTGGACTCTGAATCCA	2.67256	1.69184	0.427308	Score: 2.0	PGSC0003DMT400021703	PGSC0003DMG400008420	Endo-1,4-beta-xylanase A	cell wall and Membrane
novel91	CATTGGACTCTGAATCCA	2.67256	1.69184	0.427308	Score: 2.0	PGSC0003DMT400021704	PGSC0003DMG400008420	Endo-1,4-beta-xylanase A	cell wall and Membrane
novel91	CATTGGACTCTGAATCCA	2.67256	1.69184	0.427308	Score: 2.0	PGSC0003DMT400070951	PGSC0003DMG400027589	Glutamate dehydrogenase A	cell wall and Membrane
novel91	CATTGGACTCTGAATCCA	2.67256	1.69184	0.427308	Score: 2.0	PGSC0003DMT400057171	PGSC0003DMG400022210	Mitogen-activated protein kinase kinase kinase	kinase
novel91	CATTGGACTCTGAATCCA	2.67256	1.69184	0.427308	Score: 2.0	PGSC0003DMT400009305	PGSC0003DMG400003614	Dimethyladenosine transferase	other
novel91	CATTGGACTCTGAATCCA	2.67256	1.69184	0.427308	Score: 2.0	PGSC0003DMT400055068	PGSC0003DMG400021369	Conserved gene of unknown function	unknown
novel92	CGTGTGTCTATTTGTTCAACTTT	0	0.402818	0.961443	Score: 2.5	PGSC0003DMT400010658	PGSC0003DMG400004163	Conserved gene of unknown function	unknown
novel93	CTTGGCCTGTAGTAGGTA	10.1056	13.293	5.98231	Score: 2.5	PGSC0003DMT400006681	PGSC0003DMG400002597	Ribosomal protein L28	other
novel93	CTTGGCCTGTAGTAGGTA	10.1056	13.293	5.98231	Score: 2.5	PGSC0003DMT400012339	PGSC0003DMG400004838	Ribosomal protein L28	other
novel93	CTTGGCCTGTAGTAGGTA	10.1056	13.293	5.98231	Score: 2.5	PGSC0003DMT400012340	PGSC0003DMG400004838	Ribosomal protein L28	other
novel93	CTTGGCCTGTAGTAGGTA	10.1056	13.293	5.98231	Score: 2.5	PGSC0003DMT400090476	PGSC0003DMG400040047	Proteasome family protein	other
novel93	CTTGGCCTGTAGTAGGTA	10.1056	13.293	5.98231	Score: 2.5	PGSC0003DMT400046704	PGSC0003DMG400018132	Cytochrome P450 71A2	growth
novel93	CTTGGCCTGTAGTAGGTA	10.1056	13.293	5.98231	Score: 2.5	PGSC0003DMT400048498	PGSC0003DMG400018840	Nodulation receptor kinase	kinase
novel93	CTTGGCCTGTAGTAGGTA	10.1056	13.293	5.98231	Score: 2.5	PGSC0003DMT400017170	PGSC0003DMG400006701	ABI3-interacting protein 3	stress induced
novel93	CTTGGCCTGTAGTAGGTA	10.1056	13.293	5.98231	Score: 2.5	PGSC0003DMT400017171	PGSC0003DMG400006701	ABI3-interacting protein 3	stress induced
novel93	CTTGGCCTGTAGTAGGTA	10.1056	13.293	5.98231	Score: 2.5	PGSC0003DMT400017172	PGSC0003DMG400006701	ABI3-interacting protein 3	stress induced
novel93	CTTGGCCTGTAGTAGGTA	10.1056	13.293	5.98231	Score: 2.5	PGSC0003DMT400017173	PGSC0003DMG400006701	ABI3-interacting protein 3	stress induced
novel93	CTTGGCCTGTAGTAGGTA	10.1056	13.293	5.98231	Score: 2.5	PGSC0003DMT400087997	PGSC0003DMG400037568	Gene of unknown function	unknown
novel93	CTTGGCCTGTAGTAGGTA	10.1056	13.293	5.98231	Score: 2.5	PGSC0003DMT400096425	PGSC0003DMG400045996	Gene of unknown function	unknown
novel93	CTTGGCCTGTAGTAGGTA	10.1056	13.293	5.98231	Score: 2.5	PGSC0003DMT400020431	PGSC0003DMG400007894	Conserved gene of unknown function	unknown
novel93	CTTGGCCTGTAGTAGGTA	10.1056	13.293	5.98231	Score: 2.5	PGSC0003DMT400063075	PGSC0003DMG400024535	Conserved gene of unknown function	unknown
novel93	CTTGGCCTGTAGTAGGTA	10.1056	13.293	5.98231	Score: 2.5	PGSC0003DMT400063076	PGSC0003DMG400024535	Conserved gene of unknown function	unknown
novel93	CTTGGCCTGTAGTAGGTA	10.1056	13.293	5.98231	Score: 2.5	PGSC0003DMT400067641	PGSC0003DMG400026305	Conserved gene of unknown function	unknown
novel93	CTTGGCCTGTAGTAGGTA	10.1056	13.293	5.98231	Score: 2.5	PGSC0003DMT400067643	PGSC0003DMG400026305	Conserved gene of unknown function	unknown
novel93	CTTGGCCTGTAGTAGGTA	10.1056	13.293	5.98231	Score: 2.5	PGSC0003DMT400067644	PGSC0003DMG400026305	Conserved gene of unknown function	unknown
novel93	CTTGGCCTGTAGTAGGTA	10.1056	13.293	5.98231	Score: 2.5	PGSC0003DMT400067645	PGSC0003DMG400026305	Conserved gene of unknown function	unknown
novel93	CTTGGCCTGTAGTAGGTA	10.1056	13.293	5.98231	Score: 2.0	PGSC0003DMT400032802	PGSC0003DMG400012598	DNA binding protein	other
novel93	CTTGGCCTGTAGTAGGTA	10.1056	13.293	5.98231	Score: 2.0	PGSC0003DMT400032804	PGSC0003DMG400012598	DNA binding protein	other
novel93	CTTGGCCTGTAGTAGGTA	10.1056	13.293	5.98231	Score: 2.0	PGSC0003DMT400030768	PGSC0003DMG400011786	Group II intron splicing factor CRS1	other
novel93	CTTGGCCTGTAGTAGGTA	10.1056	13.293	5.98231	Score: 2.0	PGSC0003DMT400030769	PGSC0003DMG400011786	Group II intron splicing factor CRS1	other
novel93	CTTGGCCTGTAGTAGGTA	10.1056	13.293	5.98231	Score: 2.0	PGSC0003DMT400049292	PGSC0003DMG400019158	Short-chain dehydrogenase	other
novel93	CTTGGCCTGTAGTAGGTA	10.1056	13.293	5.98231	Score: 2.0	PGSC0003DMT400063043	PGSC0003DMG400024526	L-asparaginase	other enzyme
novel93	CTTGGCCTGTAGTAGGTA	10.1056	13.293	5.98231	Score: 2.0	PGSC0003DMT400063044	PGSC0003DMG400024526	L-asparaginase	other enzyme
novel93	CTTGGCCTGTAGTAGGTA	10.1056	13.293	5.98231	Score: 2.0	PGSC0003DMT400093018	PGSC0003DMG400042589	Conserved gene of unknown function	unknown
novel96	GATGAACCTGGTTCTGATACC	1.00221	0.483382	0	Score: 2.5	PGSC0003DMT400043326	PGSC0003DMG400016822	ADP-ribosylation factor	other
novel96	GATGAACCTGGTTCTGATACC	1.00221	0.483382	0	Score: 2.5	PGSC0003DMT400049349	PGSC0003DMG400019173	ATP binding protein	other
novel96	GATGAACCTGGTTCTGATACC	1.00221	0.483382	0	Score: 2.5	PGSC0003DMT400004034	PGSC0003DMG400001593	Protein translocase	other
novel96	GATGAACCTGGTTCTGATACC	1.00221	0.483382	0	Score: 2.5	PGSC0003DMT400004035	PGSC0003DMG400001593	Protein translocase	other
novel96	GATGAACCTGGTTCTGATACC	1.00221	0.483382	0	Score: 2.5	PGSC0003DMT400004036	PGSC0003DMG400001593	Protein translocase	other
novel96	GATGAACCTGGTTCTGATACC	1.00221	0.483382	0	Score: 2.5	PGSC0003DMT400043251	PGSC0003DMG400016790	Homeodomain-leucine zipper protein 56	hormone response
novel96	GATGAACCTGGTTCTGATACC	1.00221	0.483382	0	Score: 2.5	PGSC0003DMT400054694	PGSC0003DMG400021237	Gene of unknown function	unknown
novel96	GATGAACCTGGTTCTGATACC	1.00221	0.483382	0	Score: 2.5	PGSC0003DMT400063396	PGSC0003DMG400024659	Conserved gene of unknown function	unknown
novel96	GATGAACCTGGTTCTGATACC	1.00221	0.483382	0	Score: 2.5	PGSC0003DMT400063397	PGSC0003DMG400024659	Conserved gene of unknown function	unknown
novel96	GATGAACCTGGTTCTGATACC	1.00221	0.483382	0	Score: 2.0	PGSC0003DMT400007029	PGSC0003DMG400002716	Gamma-tubulin complex component	growth
novel97	GCATCCATGGCTGAATGG	1.08573	0.644509	0.534135	Score: 2.5	PGSC0003DMT400035344	PGSC0003DMG400013579	Beta-ketoacyl-ACP synthase II	other
novel97	GCATCCATGGCTGAATGG	1.08573	0.644509	0.534135	Score: 2.5	PGSC0003DMT400027395	PGSC0003DMG400010566	Integrase core domain containing protein	other
novel97	GCATCCATGGCTGAATGG	1.08573	0.644509	0.534135	Score: 2.5	PGSC0003DMT400045904	PGSC0003DMG400017803	Integrase core domain containing protein	other
novel97	GCATCCATGGCTGAATGG	1.08573	0.644509	0.534135	Score: 2.5	PGSC0003DMT400085404	PGSC0003DMG400034975	Integrase core domain containing protein	other
novel97	GCATCCATGGCTGAATGG	1.08573	0.644509	0.534135	Score: 2.5	PGSC0003DMT400085940	PGSC0003DMG400035511	Integrase core domain containing protein	other
novel97	GCATCCATGGCTGAATGG	1.08573	0.644509	0.534135	Score: 2.5	PGSC0003DMT400086787	PGSC0003DMG400036358	Integrase core domain containing protein	other
novel97	GCATCCATGGCTGAATGG	1.08573	0.644509	0.534135	Score: 2.5	PGSC0003DMT400086949	PGSC0003DMG400036520	Integrase core domain containing protein	other
novel97	GCATCCATGGCTGAATGG	1.08573	0.644509	0.534135	Score: 2.5	PGSC0003DMT400087283	PGSC0003DMG400036854	Integrase core domain containing protein	other
novel97	GCATCCATGGCTGAATGG	1.08573	0.644509	0.534135	Score: 2.5	PGSC0003DMT400087823	PGSC0003DMG400037394	Integrase core domain containing protein	other
novel97	GCATCCATGGCTGAATGG	1.08573	0.644509	0.534135	Score: 2.5	PGSC0003DMT400087922	PGSC0003DMG400037493	Integrase core domain containing protein	other
novel97	GCATCCATGGCTGAATGG	1.08573	0.644509	0.534135	Score: 2.5	PGSC0003DMT400088430	PGSC0003DMG400038001	Integrase core domain containing protein	other
novel97	GCATCCATGGCTGAATGG	1.08573	0.644509	0.534135	Score: 2.5	PGSC0003DMT400088526	PGSC0003DMG400038097	Integrase core domain containing protein	other
novel97	GCATCCATGGCTGAATGG	1.08573	0.644509	0.534135	Score: 2.5	PGSC0003DMT400088704	PGSC0003DMG400038275	Integrase core domain containing protein	other
novel97	GCATCCATGGCTGAATGG	1.08573	0.644509	0.534135	Score: 2.5	PGSC0003DMT400088833	PGSC0003DMG400038404	Integrase core domain containing protein	other
novel97	GCATCCATGGCTGAATGG	1.08573	0.644509	0.534135	Score: 2.5	PGSC0003DMT400088958	PGSC0003DMG400038529	Integrase core domain containing protein	other
novel97	GCATCCATGGCTGAATGG	1.08573	0.644509	0.534135	Score: 2.5	PGSC0003DMT400089141	PGSC0003DMG400038712	Integrase core domain containing protein	other
novel97	GCATCCATGGCTGAATGG	1.08573	0.644509	0.534135	Score: 2.5	PGSC0003DMT400089230	PGSC0003DMG400038801	Integrase core domain containing protein	other
novel97	GCATCCATGGCTGAATGG	1.08573	0.644509	0.534135	Score: 2.5	PGSC0003DMT400090045	PGSC0003DMG400039616	Integrase core domain containing protein	other
novel97	GCATCCATGGCTGAATGG	1.08573	0.644509	0.534135	Score: 2.5	PGSC0003DMT400090444	PGSC0003DMG400040015	Integrase core domain containing protein	other
novel97	GCATCCATGGCTGAATGG	1.08573	0.644509	0.534135	Score: 2.5	PGSC0003DMT400090535	PGSC0003DMG400040106	Integrase core domain containing protein	other
novel97	GCATCCATGGCTGAATGG	1.08573	0.644509	0.534135	Score: 2.5	PGSC0003DMT400091608	PGSC0003DMG400041179	Integrase core domain containing protein	other
novel97	GCATCCATGGCTGAATGG	1.08573	0.644509	0.534135	Score: 2.5	PGSC0003DMT400092314	PGSC0003DMG400041885	Integrase core domain containing protein	other
novel97	GCATCCATGGCTGAATGG	1.08573	0.644509	0.534135	Score: 2.5	PGSC0003DMT400092821	PGSC0003DMG400042392	Integrase core domain containing protein	other
novel97	GCATCCATGGCTGAATGG	1.08573	0.644509	0.534135	Score: 2.5	PGSC0003DMT400094271	PGSC0003DMG400043842	Integrase core domain containing protein	other
novel97	GCATCCATGGCTGAATGG	1.08573	0.644509	0.534135	Score: 2.5	PGSC0003DMT400094574	PGSC0003DMG400044145	Integrase core domain containing protein	other
novel97	GCATCCATGGCTGAATGG	1.08573	0.644509	0.534135	Score: 2.5	PGSC0003DMT400094999	PGSC0003DMG400044570	Integrase core domain containing protein	other
novel97	GCATCCATGGCTGAATGG	1.08573	0.644509	0.534135	Score: 2.5	PGSC0003DMT400095728	PGSC0003DMG400045299	Integrase core domain containing protein	other
novel97	GCATCCATGGCTGAATGG	1.08573	0.644509	0.534135	Score: 2.5	PGSC0003DMT400096896	PGSC0003DMG400046467	Integrase core domain containing protein	other
novel97	GCATCCATGGCTGAATGG	1.08573	0.644509	0.534135	Score: 2.5	PGSC0003DMT400097449	PGSC0003DMG400047020	Integrase core domain containing protein	other
novel97	GCATCCATGGCTGAATGG	1.08573	0.644509	0.534135	Score: 2.5	PGSC0003DMT400097664	PGSC0003DMG400047235	Integrase core domain containing protein	other
novel97	GCATCCATGGCTGAATGG	1.08573	0.644509	0.534135	Score: 2.5	PGSC0003DMT400094724	PGSC0003DMG400044295	Protein FRIGIDA	other
novel97	GCATCCATGGCTGAATGG	1.08573	0.644509	0.534135	Score: 2.5	PGSC0003DMT400021018	PGSC0003DMG400008137	Glucosyltransferase	cell wall and Membrane
novel97	GCATCCATGGCTGAATGG	1.08573	0.644509	0.534135	Score: 2.5	PGSC0003DMT400086002	PGSC0003DMG400035573	Glucosyltransferase	cell wall and Membrane
novel97	GCATCCATGGCTGAATGG	1.08573	0.644509	0.534135	Score: 2.5	PGSC0003DMT400076122	PGSC0003DMG400029599	Chromatin remodeling complex subunit	growth
novel97	GCATCCATGGCTGAATGG	1.08573	0.644509	0.534135	Score: 2.5	PGSC0003DMT400069308	PGSC0003DMG402026960	Protein kinase	kinase
novel97	GCATCCATGGCTGAATGG	1.08573	0.644509	0.534135	Score: 2.5	PGSC0003DMT400011788	PGSC0003DMG400004629	Epoxide hydrolase 1	other enzyme
novel97	GCATCCATGGCTGAATGG	1.08573	0.644509	0.534135	Score: 2.5	PGSC0003DMT400011789	PGSC0003DMG400004629	Epoxide hydrolase 1	other enzyme
novel97	GCATCCATGGCTGAATGG	1.08573	0.644509	0.534135	Score: 2.5	PGSC0003DMT400011790	PGSC0003DMG400004629	Epoxide hydrolase 1	other enzyme
novel97	GCATCCATGGCTGAATGG	1.08573	0.644509	0.534135	Score: 2.5	PGSC0003DMT400011791	PGSC0003DMG400004629	Epoxide hydrolase 1	other enzyme
novel97	GCATCCATGGCTGAATGG	1.08573	0.644509	0.534135	Score: 2.5	PGSC0003DMT400024306	PGSC0003DMG402009395	26S proteasome regulatory subunit rpn1	other enzyme
novel97	GCATCCATGGCTGAATGG	1.08573	0.644509	0.534135	Score: 2.5	PGSC0003DMT400074124	PGSC0003DMG400028810	Amine oxidase	other enzyme
novel97	GCATCCATGGCTGAATGG	1.08573	0.644509	0.534135	Score: 2.5	PGSC0003DMT400074125	PGSC0003DMG400028810	Amine oxidase	other enzyme
novel97	GCATCCATGGCTGAATGG	1.08573	0.644509	0.534135	Score: 2.5	PGSC0003DMT400074127	PGSC0003DMG400028810	Amine oxidase	other enzyme
novel97	GCATCCATGGCTGAATGG	1.08573	0.644509	0.534135	Score: 2.5	PGSC0003DMT400086748	PGSC0003DMG400036319	Gene of unknown function	unknown
novel97	GCATCCATGGCTGAATGG	1.08573	0.644509	0.534135	Score: 2.5	PGSC0003DMT400088152	PGSC0003DMG400037723	Gene of unknown function	unknown
novel97	GCATCCATGGCTGAATGG	1.08573	0.644509	0.534135	Score: 2.5	PGSC0003DMT400092150	PGSC0003DMG400041721	Gene of unknown function	unknown
novel97	GCATCCATGGCTGAATGG	1.08573	0.644509	0.534135	Score: 2.5	PGSC0003DMT400093346	PGSC0003DMG400042917	Gene of unknown function	unknown
novel97	GCATCCATGGCTGAATGG	1.08573	0.644509	0.534135	Score: 2.5	PGSC0003DMT400095467	PGSC0003DMG400045038	Gene of unknown function	unknown
novel97	GCATCCATGGCTGAATGG	1.08573	0.644509	0.534135	Score: 2.5	PGSC0003DMT400096310	PGSC0003DMG400045881	Gene of unknown function	unknown
novel97	GCATCCATGGCTGAATGG	1.08573	0.644509	0.534135	Score: 2.0	PGSC0003DMT400054965	PGSC0003DMG400021331	PEN1	growth
novel97	GCATCCATGGCTGAATGG	1.08573	0.644509	0.534135	Score: 2.0	PGSC0003DMT400084913	PGSC0003DMG400034484	Integrase core domain containing protein	other
novel97	GCATCCATGGCTGAATGG	1.08573	0.644509	0.534135	Score: 2.0	PGSC0003DMT400085943	PGSC0003DMG400035514	Integrase core domain containing protein	other
novel97	GCATCCATGGCTGAATGG	1.08573	0.644509	0.534135	Score: 2.0	PGSC0003DMT400085953	PGSC0003DMG400035524	Integrase core domain containing protein	other
novel97	GCATCCATGGCTGAATGG	1.08573	0.644509	0.534135	Score: 2.0	PGSC0003DMT400086022	PGSC0003DMG400035593	Integrase core domain containing protein	other
novel97	GCATCCATGGCTGAATGG	1.08573	0.644509	0.534135	Score: 2.0	PGSC0003DMT400086178	PGSC0003DMG400035749	Integrase core domain containing protein	other
novel97	GCATCCATGGCTGAATGG	1.08573	0.644509	0.534135	Score: 2.0	PGSC0003DMT400086677	PGSC0003DMG400036248	Integrase core domain containing protein	other
novel97	GCATCCATGGCTGAATGG	1.08573	0.644509	0.534135	Score: 2.0	PGSC0003DMT400087194	PGSC0003DMG400036765	Integrase core domain containing protein	other
novel97	GCATCCATGGCTGAATGG	1.08573	0.644509	0.534135	Score: 2.0	PGSC0003DMT400087984	PGSC0003DMG400037555	Integrase core domain containing protein	other
novel97	GCATCCATGGCTGAATGG	1.08573	0.644509	0.534135	Score: 2.0	PGSC0003DMT400088000	PGSC0003DMG400037571	Integrase core domain containing protein	other
novel97	GCATCCATGGCTGAATGG	1.08573	0.644509	0.534135	Score: 2.0	PGSC0003DMT400088838	PGSC0003DMG400038409	Integrase core domain containing protein	other
novel97	GCATCCATGGCTGAATGG	1.08573	0.644509	0.534135	Score: 2.0	PGSC0003DMT400089432	PGSC0003DMG400039003	Integrase core domain containing protein	other
novel97	GCATCCATGGCTGAATGG	1.08573	0.644509	0.534135	Score: 2.0	PGSC0003DMT400089607	PGSC0003DMG400039178	Integrase core domain containing protein	other
novel97	GCATCCATGGCTGAATGG	1.08573	0.644509	0.534135	Score: 2.0	PGSC0003DMT400089959	PGSC0003DMG400039530	Integrase core domain containing protein	other
novel97	GCATCCATGGCTGAATGG	1.08573	0.644509	0.534135	Score: 2.0	PGSC0003DMT400090889	PGSC0003DMG400040460	Integrase core domain containing protein	other
novel97	GCATCCATGGCTGAATGG	1.08573	0.644509	0.534135	Score: 2.0	PGSC0003DMT400090966	PGSC0003DMG400040537	Integrase core domain containing protein	other
novel97	GCATCCATGGCTGAATGG	1.08573	0.644509	0.534135	Score: 2.0	PGSC0003DMT400091823	PGSC0003DMG400041394	Integrase core domain containing protein	other
novel97	GCATCCATGGCTGAATGG	1.08573	0.644509	0.534135	Score: 2.0	PGSC0003DMT400091933	PGSC0003DMG400041504	Integrase core domain containing protein	other
novel97	GCATCCATGGCTGAATGG	1.08573	0.644509	0.534135	Score: 2.0	PGSC0003DMT400092308	PGSC0003DMG400041879	Integrase core domain containing protein	other
novel97	GCATCCATGGCTGAATGG	1.08573	0.644509	0.534135	Score: 2.0	PGSC0003DMT400092453	PGSC0003DMG400042024	Integrase core domain containing protein	other
novel97	GCATCCATGGCTGAATGG	1.08573	0.644509	0.534135	Score: 2.0	PGSC0003DMT400092607	PGSC0003DMG400042178	Integrase core domain containing protein	other
novel97	GCATCCATGGCTGAATGG	1.08573	0.644509	0.534135	Score: 2.0	PGSC0003DMT400092875	PGSC0003DMG400042446	Integrase core domain containing protein	other
novel97	GCATCCATGGCTGAATGG	1.08573	0.644509	0.534135	Score: 2.0	PGSC0003DMT400092972	PGSC0003DMG400042543	Integrase core domain containing protein	other
novel97	GCATCCATGGCTGAATGG	1.08573	0.644509	0.534135	Score: 2.0	PGSC0003DMT400093244	PGSC0003DMG400042815	Integrase core domain containing protein	other
novel97	GCATCCATGGCTGAATGG	1.08573	0.644509	0.534135	Score: 2.0	PGSC0003DMT400094312	PGSC0003DMG400043883	Integrase core domain containing protein	other
novel97	GCATCCATGGCTGAATGG	1.08573	0.644509	0.534135	Score: 2.0	PGSC0003DMT400094982	PGSC0003DMG400044553	Integrase core domain containing protein	other
novel97	GCATCCATGGCTGAATGG	1.08573	0.644509	0.534135	Score: 2.0	PGSC0003DMT400094982	PGSC0003DMG400044553	Integrase core domain containing protein	other
novel97	GCATCCATGGCTGAATGG	1.08573	0.644509	0.534135	Score: 2.0	PGSC0003DMT400095069	PGSC0003DMG400044640	Integrase core domain containing protein	other
novel97	GCATCCATGGCTGAATGG	1.08573	0.644509	0.534135	Score: 2.0	PGSC0003DMT400095814	PGSC0003DMG400045385	Integrase core domain containing protein	other
novel97	GCATCCATGGCTGAATGG	1.08573	0.644509	0.534135	Score: 2.0	PGSC0003DMT400096485	PGSC0003DMG400046056	Integrase core domain containing protein	other
novel97	GCATCCATGGCTGAATGG	1.08573	0.644509	0.534135	Score: 2.0	PGSC0003DMT400096688	PGSC0003DMG400046259	Integrase core domain containing protein	other
novel97	GCATCCATGGCTGAATGG	1.08573	0.644509	0.534135	Score: 2.0	PGSC0003DMT400097510	PGSC0003DMG400047081	Integrase core domain containing protein	other
novel97	GCATCCATGGCTGAATGG	1.08573	0.644509	0.534135	Score: 2.0	PGSC0003DMT400094636	PGSC0003DMG400044207	Singapore isolate B (sub-type 7) whole genome shotgun sequence assembly, scaffold_7	other
novel97	GCATCCATGGCTGAATGG	1.08573	0.644509	0.534135	Score: 2.0	PGSC0003DMT400086833	PGSC0003DMG400036404	Gene of unknown function	unknown
novel97	GCATCCATGGCTGAATGG	1.08573	0.644509	0.534135	Score: 2.0	PGSC0003DMT400088856	PGSC0003DMG400038427	Gene of unknown function	unknown
novel97	GCATCCATGGCTGAATGG	1.08573	0.644509	0.534135	Score: 2.0	PGSC0003DMT400093131	PGSC0003DMG400042702	Gene of unknown function	unknown
novel97	GCATCCATGGCTGAATGG	1.08573	0.644509	0.534135	Score: 2.0	PGSC0003DMT400096444	PGSC0003DMG400046015	Gene of unknown function	unknown
novel97	GCATCCATGGCTGAATGG	1.08573	0.644509	0.534135	Score: 2.2	PGSC0003DMT400031984	PGSC0003DMG400012269	Cell division protein isolog	growth
novel97	GCATCCATGGCTGAATGG	1.08573	0.644509	0.534135	Score: 2.2	PGSC0003DMT400051268	PGSC0003DMG400019912	Homeobox protein GLABRA2	hormone response
novel97	GCATCCATGGCTGAATGG	1.08573	0.644509	0.534135	Score: 2.2	PGSC0003DMT400039247	PGSC0003DMG401015175	B3 domain-containing protein Os01g0905400	Transcription factor
novel97	GCATCCATGGCTGAATGG	1.08573	0.644509	0.534135	Score: 2.2	PGSC0003DMT400039248	PGSC0003DMG401015175	B3 domain-containing protein Os01g0905400	Transcription factor
novel97	GCATCCATGGCTGAATGG	1.08573	0.644509	0.534135	Score: 2.2	PGSC0003DMT400039249	PGSC0003DMG401015175	B3 domain-containing protein Os01g0905400	Transcription factor
novel97	GCATCCATGGCTGAATGG	1.08573	0.644509	0.534135	Score: 1.8	PGSC0003DMT400087050	PGSC0003DMG400036621	Conserved gene of unknown function	unknown
novel97	GCATCCATGGCTGAATGG	1.08573	0.644509	0.534135	Score: 1.5	PGSC0003DMT400087925	PGSC0003DMG400037496	Gene of unknown function	unknown
novel97	GCATCCATGGCTGAATGG	1.08573	0.644509	0.534135	Score: 1.5	PGSC0003DMT400016289	PGSC0003DMG400006366	Integrase core domain containing protein	other
novel97	GCATCCATGGCTGAATGG	1.08573	0.644509	0.534135	Score: 1.5	PGSC0003DMT400048472	PGSC0003DMG400018828	Integrase core domain containing protein	other
novel97	GCATCCATGGCTGAATGG	1.08573	0.644509	0.534135	Score: 1.5	PGSC0003DMT400087315	PGSC0003DMG400036886	Integrase core domain containing protein	other
novel97	GCATCCATGGCTGAATGG	1.08573	0.644509	0.534135	Score: 1.0	PGSC0003DMT400087792	PGSC0003DMG400037363	Integrase core domain containing protein	other
novel97	GCATCCATGGCTGAATGG	1.08573	0.644509	0.534135	Score: 1.5	PGSC0003DMT400087820	PGSC0003DMG400037391	Integrase core domain containing protein	other
novel97	GCATCCATGGCTGAATGG	1.08573	0.644509	0.534135	Score: 1.5	PGSC0003DMT400088178	PGSC0003DMG400037749	Integrase core domain containing protein	other
novel97	GCATCCATGGCTGAATGG	1.08573	0.644509	0.534135	Score: 1.5	PGSC0003DMT400088298	PGSC0003DMG400037869	Integrase core domain containing protein	other
novel97	GCATCCATGGCTGAATGG	1.08573	0.644509	0.534135	Score: 1.0	PGSC0003DMT400089216	PGSC0003DMG400038787	Integrase core domain containing protein	other
novel97	GCATCCATGGCTGAATGG	1.08573	0.644509	0.534135	Score: 1.5	PGSC0003DMT400090091	PGSC0003DMG400039662	Integrase core domain containing protein	other
novel97	GCATCCATGGCTGAATGG	1.08573	0.644509	0.534135	Score: 1.5	PGSC0003DMT400090499	PGSC0003DMG400040070	Integrase core domain containing protein	other
novel97	GCATCCATGGCTGAATGG	1.08573	0.644509	0.534135	Score: 1.0	PGSC0003DMT400094625	PGSC0003DMG400044196	Integrase core domain containing protein	other
novel97	GCATCCATGGCTGAATGG	1.08573	0.644509	0.534135	Score: 1.5	PGSC0003DMT400094796	PGSC0003DMG400044367	Integrase core domain containing protein	other
novel97	GCATCCATGGCTGAATGG	1.08573	0.644509	0.534135	Score: 1.5	PGSC0003DMT400094991	PGSC0003DMG400044562	Integrase core domain containing protein	other
novel97	GCATCCATGGCTGAATGG	1.08573	0.644509	0.534135	Score: 1.5	PGSC0003DMT400095920	PGSC0003DMG400045491	Integrase core domain containing protein	other
novel97	GCATCCATGGCTGAATGG	1.08573	0.644509	0.534135	Score: 1.5	PGSC0003DMT400096023	PGSC0003DMG400045594	Integrase core domain containing protein	other
novel98	GCGTAGGCCTCCCAAAAGG	9.52101	8.05637	2.7775	Score: 2.5	PGSC0003DMT400051237	PGSC0003DMG400019898	Glycosyl hydrolase family 9	cell wall and Membrane
novel98	GCGTAGGCCTCCCAAAAGG	9.52101	8.05637	2.7775	Score: 2.5	PGSC0003DMT400051238	PGSC0003DMG400019898	Glycosyl hydrolase family 9	cell wall and Membrane
novel98	GCGTAGGCCTCCCAAAAGG	9.52101	8.05637	2.7775	Score: 2.5	PGSC0003DMT400027999	PGSC0003DMG401010796	Conserved gene of unknown function	unknown
novel98	GCGTAGGCCTCCCAAAAGG	9.52101	8.05637	2.7775	Score: 2.5	PGSC0003DMT400028001	PGSC0003DMG401010796	Conserved gene of unknown function	unknown
novel98	GCGTAGGCCTCCCAAAAGG	9.52101	8.05637	2.7775	Score: 2.5	PGSC0003DMT400028002	PGSC0003DMG401010796	Conserved gene of unknown function	unknown
novel99	GGGCTATTAGCTCAGTGG	1.33628	1.45015	0.640962	Score: 2.5	PGSC0003DMT400084781	PGSC0003DMG400034352	Anthranilate N-benzoyltransferase protein	other
novel99	GGGCTATTAGCTCAGTGG	1.33628	1.45015	0.640962	Score: 2.5	PGSC0003DMT400033541	PGSC0003DMG400012881	FZL	other
novel99	GGGCTATTAGCTCAGTGG	1.33628	1.45015	0.640962	Score: 2.5	PGSC0003DMT400027525	PGSC0003DMG400010611	Purine permease	other
novel99	GGGCTATTAGCTCAGTGG	1.33628	1.45015	0.640962	Score: 2.5	PGSC0003DMT400000326	PGSC0003DMG400000110	Wax synthase	other
novel99	GGGCTATTAGCTCAGTGG	1.33628	1.45015	0.640962	Score: 2.5	PGSC0003DMT400055751	PGSC0003DMG400021649	Mitogen-activated protein kinase 4	kinase
novel99	GGGCTATTAGCTCAGTGG	1.33628	1.45015	0.640962	Score: 2.5	PGSC0003DMT400002741	PGSC0003DMG400001063	Ring finger protein	Transcription factor
novel99	GGGCTATTAGCTCAGTGG	1.33628	1.45015	0.640962	Score: 2.5	PGSC0003DMT400031888	PGSC0003DMG400012231	Electron transporter	transport related
novel99	GGGCTATTAGCTCAGTGG	1.33628	1.45015	0.640962	Score: 2.5	PGSC0003DMT400031889	PGSC0003DMG400012231	Electron transporter	transport related
novel99	GGGCTATTAGCTCAGTGG	1.33628	1.45015	0.640962	Score: 2.5	PGSC0003DMT400087145	PGSC0003DMG400036716	Gene of unknown function	unknown
novel99	GGGCTATTAGCTCAGTGG	1.33628	1.45015	0.640962	Score: 2.5	PGSC0003DMT400072972	PGSC0003DMG400028384	Conserved gene of unknown function	unknown
novel99	GGGCTATTAGCTCAGTGG	1.33628	1.45015	0.640962	Score: 2.0	PGSC0003DMT400033911	PGSC0003DMG400013030	Amino acid binding protein	other
novel99	GGGCTATTAGCTCAGTGG	1.33628	1.45015	0.640962	Score: 2.0	PGSC0003DMT400002873	PGSC0003DMG400001121	Cysteine desulfurylase	other
novel99	GGGCTATTAGCTCAGTGG	1.33628	1.45015	0.640962	Score: 2.0	PGSC0003DMT400002874	PGSC0003DMG400001121	Cysteine desulfurylase	other
novel99	GGGCTATTAGCTCAGTGG	1.33628	1.45015	0.640962	Score: 2.0	PGSC0003DMT400035471	PGSC0003DMG401013636	Protein transport protein Sec24	transport related
novel99	GGGCTATTAGCTCAGTGG	1.33628	1.45015	0.640962	Score: 2.0	PGSC0003DMT400035474	PGSC0003DMG401013636	Protein transport protein Sec24	transport related
novel99	GGGCTATTAGCTCAGTGG	1.33628	1.45015	0.640962	Score: 2.2	PGSC0003DMT400080005	PGSC0003DMG400031153	Pentatricopeptide repeat-containing protein	growth
novel99	GGGCTATTAGCTCAGTGG	1.33628	1.45015	0.640962	Score: 2.2	PGSC0003DMT400064364	PGSC0003DMG400025005	2,4-dienoyl-CoA reductase	other enzyme
novel99	GGGCTATTAGCTCAGTGG	1.33628	1.45015	0.640962	Score: 2.2	PGSC0003DMT400095887	PGSC0003DMG400045458	Gene of unknown function	unknown
stu-miR162b-3p	TCGATAAACCTCTGCATCCAG	375.913	247.169	67.1942	Score: 2.5	PGSC0003DMT400002964	PGSC0003DMG400001162	SnRK1-interacting protein 1	other
stu-miR162b-3p	TCGATAAACCTCTGCATCCAG	375.913	247.169	67.1942	Score: 2.5	PGSC0003DMT400089345	PGSC0003DMG400038916	Integrase core domain containing protein	other
stu-miR162b-3p	TCGATAAACCTCTGCATCCAG	375.913	247.169	67.1942	Score: 2.5	PGSC0003DMT400013553	PGSC0003DMG400005293	Conserved gene of unknown function	unknown
stu-miR162b-3p	TCGATAAACCTCTGCATCCAG	375.913	247.169	67.1942	Score: 2.5	PGSC0003DMT400013554	PGSC0003DMG400005293	Conserved gene of unknown function	unknown
stu-miR162b-3p	TCGATAAACCTCTGCATCCAG	375.913	247.169	67.1942	Score: 2.5	PGSC0003DMT400040797	PGSC0003DMG400015776	Conserved gene of unknown function	unknown
stu-miR162b-3p	TCGATAAACCTCTGCATCCAG	375.913	247.169	67.1942	Score: 2.5	PGSC0003DMT400040799	PGSC0003DMG400015776	Conserved gene of unknown function	unknown
stu-miR162b-3p	TCGATAAACCTCTGCATCCAG	375.913	247.169	67.1942	Score: 2.2	PGSC0003DMT400033081	PGSC0003DMG400012703	U4/U6 small nuclear ribonucleoprotein Prp4	Ubiquitin
stu-miR162b-5p	GGAGGCAGCGGTTCATCGATC	8.35176	4.51157	1.70923	Score: 2.5	PGSC0003DMT400046483	PGSC0003DMG400018042	Bzip-like transcription factor	Transcription factor
stu-miR162b-5p	GGAGGCAGCGGTTCATCGATC	8.35176	4.51157	1.70923	Score: 2.2	PGSC0003DMT400041614	PGSC0003DMG400016131	Conserved gene of unknown function	unknown
stu-miR162b-5p	GGAGGCAGCGGTTCATCGATC	8.35176	4.51157	1.70923	Score: 2.2	PGSC0003DMT400058200	PGSC0003DMG400022599	Serine-threonine protein kinase, plant-type	kinase
stu-miR166a-3p	TCGGACCAGGCTTCATTCCCC	66.9811	34.159	18.3742	Score: 1.8	PGSC0003DMT400030829	PGSC0003DMG400011810	PHAVOLUTA-like HD-ZIPIII protein	Transcription factor
stu-miR166a-3p	TCGGACCAGGCTTCATTCCCC	66.9811	34.159	18.3742	Score: 1.8	PGSC0003DMT400054420	PGSC0003DMG400021125	PHAVOLUTA-like HD-ZIPIII protein	Transcription factor
stu-miR166a-3p	TCGGACCAGGCTTCATTCCCC	66.9811	34.159	18.3742	Score: 1.8	PGSC0003DMT400054421	PGSC0003DMG400021125	PHAVOLUTA-like HD-ZIPIII protein	Transcription factor
stu-miR166a-3p	TCGGACCAGGCTTCATTCCCC	66.9811	34.159	18.3742	Score: 1.8	PGSC0003DMT400054422	PGSC0003DMG400021125	PHAVOLUTA-like HD-ZIPIII protein	Transcription factor
stu-miR166a-3p	TCGGACCAGGCTTCATTCCCC	66.9811	34.159	18.3742	Score: 1.8	PGSC0003DMT400054423	PGSC0003DMG400021125	PHAVOLUTA-like HD-ZIPIII protein	Transcription factor
stu-miR166a-3p	TCGGACCAGGCTTCATTCCCC	66.9811	34.159	18.3742	Score: 1.8	PGSC0003DMT400074932	PGSC0003DMG401029143	Class III HD-Zip protein 8	Transcription factor
stu-miR166a-3p	TCGGACCAGGCTTCATTCCCC	66.9811	34.159	18.3742	Score: 1.8	PGSC0003DMT400074934	PGSC0003DMG402029143	Class III HD-Zip protein 8	Transcription factor
stu-miR166a-3p	TCGGACCAGGCTTCATTCCCC	66.9811	34.159	18.3742	Score: 1.2	PGSC0003DMT400006735	PGSC0003DMG400002616	DNA binding protein	other
stu-miR166a-3p	TCGGACCAGGCTTCATTCCCC	66.9811	34.159	18.3742	Score: 1.8	PGSC0003DMT400020801	PGSC0003DMG401008054	DNA binding protein	other
stu-miR166a-3p	TCGGACCAGGCTTCATTCCCC	66.9811	34.159	18.3742	Score: 1.2	PGSC0003DMT400068035	PGSC0003DMG400026460	DNA binding protein	other
stu-miR166a-3p	TCGGACCAGGCTTCATTCCCC	66.9811	34.159	18.3742	Score: 1.2	PGSC0003DMT400068037	PGSC0003DMG400026460	DNA binding protein	other
stu-miR166a-3p	TCGGACCAGGCTTCATTCCCC	66.9811	34.159	18.3742	Score: 1.2	PGSC0003DMT400068038	PGSC0003DMG400026460	DNA binding protein	other
stu-miR166a-3p	TCGGACCAGGCTTCATTCCCC	66.9811	34.159	18.3742	Score: 1.2	PGSC0003DMT400068039	PGSC0003DMG400026460	DNA binding protein	other
stu-miR166b	TCGGACCAGGCTTCATTCCTC	6.76493	3.06142	1.06827	Score: 1.8	PGSC0003DMT400074932	PGSC0003DMG401029143	Class III HD-Zip protein 8	Transcription factor
stu-miR166b	TCGGACCAGGCTTCATTCCTC	6.76493	3.06142	1.06827	Score: 1.8	PGSC0003DMT400074934	PGSC0003DMG402029143	Class III HD-Zip protein 8	Transcription factor
stu-miR166b	TCGGACCAGGCTTCATTCCTC	6.76493	3.06142	1.06827	Score: 1.2	PGSC0003DMT400006735	PGSC0003DMG400002616	DNA binding protein	other
stu-miR166b	TCGGACCAGGCTTCATTCCTC	6.76493	3.06142	1.06827	Score: 1.8	PGSC0003DMT400020801	PGSC0003DMG401008054	DNA binding protein	other
stu-miR166b	TCGGACCAGGCTTCATTCCTC	6.76493	3.06142	1.06827	Score: 1.2	PGSC0003DMT400068035	PGSC0003DMG400026460	DNA binding protein	other
stu-miR166b	TCGGACCAGGCTTCATTCCTC	6.76493	3.06142	1.06827	Score: 1.2	PGSC0003DMT400068037	PGSC0003DMG400026460	DNA binding protein	other
stu-miR166b	TCGGACCAGGCTTCATTCCTC	6.76493	3.06142	1.06827	Score: 1.2	PGSC0003DMT400068038	PGSC0003DMG400026460	DNA binding protein	other
stu-miR166b	TCGGACCAGGCTTCATTCCTC	6.76493	3.06142	1.06827	Score: 1.2	PGSC0003DMT400068039	PGSC0003DMG400026460	DNA binding protein	other
stu-miR167b-3p	GATCATGTGGCAGCATCACC	2.33849	1.85296	0.427308	Score: 2.0	PGSC0003DMT400094722	PGSC0003DMG400044293	Gene of unknown function	unknown
stu-miR167d-3p	GATCATGTGGTTGCTTCACC	3.09015	3.46424	1.06827	Score: 2.5	PGSC0003DMT400014395	PGSC0003DMG400005647	AP-3 complex subunit delta	other
stu-miR167d-3p	GATCATGTGGTTGCTTCACC	3.09015	3.46424	1.06827	Score: 2.5	PGSC0003DMT400071281	PGSC0003DMG400027718	LOB domain-containing protein	other
stu-miR167d-3p	GATCATGTGGTTGCTTCACC	3.09015	3.46424	1.06827	Score: 2.5	PGSC0003DMT400032279	PGSC0003DMG400012402	Pentatricopeptide repeat-containing protein	growth
stu-miR167d-3p	GATCATGTGGTTGCTTCACC	3.09015	3.46424	1.06827	Score: 2.5	PGSC0003DMT400089639	PGSC0003DMG400039210	Gene of unknown function	unknown
stu-miR167d-3p	GATCATGTGGTTGCTTCACC	3.09015	3.46424	1.06827	Score: 2.5	PGSC0003DMT400094090	PGSC0003DMG400043661	Gene of unknown function	unknown
stu-miR167d-3p	GATCATGTGGTTGCTTCACC	3.09015	3.46424	1.06827	Score: 2.5	PGSC0003DMT400009679	PGSC0003DMG400003777	Conserved gene of unknown function	unknown
stu-miR171b-3p	TTGAGCCGCGTCAATATCTCT	2.42201	1.69184	0.640962	Score: 2.5	PGSC0003DMT400016889	PGSC0003DMG400006606	Peptide transporter	other
stu-miR171b-3p	TTGAGCCGCGTCAATATCTCT	2.42201	1.69184	0.640962	Score: 2.5	PGSC0003DMT400016891	PGSC0003DMG400006607	Peptide transporter	other
stu-miR171b-3p	TTGAGCCGCGTCAATATCTCT	2.42201	1.69184	0.640962	Score: 2.5	PGSC0003DMT400019420	PGSC0003DMG400007509	Peptide transporter	other
stu-miR171b-3p	TTGAGCCGCGTCAATATCTCT	2.42201	1.69184	0.640962	Score: 2.5	PGSC0003DMT400019426	PGSC0003DMG400007511	Peptide transporter	other
stu-miR171b-3p	TTGAGCCGCGTCAATATCTCT	2.42201	1.69184	0.640962	Score: 2.5	PGSC0003DMT400031475	PGSC0003DMG400012071	Nodulation signaling pathway 2 protein	other
stu-miR171b-3p	TTGAGCCGCGTCAATATCTCT	2.42201	1.69184	0.640962	Score: 2.5	PGSC0003DMT400089455	PGSC0003DMG400039026	Gene of unknown function	unknown
stu-miR171b-3p	TTGAGCCGCGTCAATATCTCT	2.42201	1.69184	0.640962	Score: 1.5	PGSC0003DMT400012104	PGSC0003DMG400004752	Hairy meristem	growth
stu-miR171b-3p	TTGAGCCGCGTCAATATCTCT	2.42201	1.69184	0.640962	Score: 0.8	PGSC0003DMT400066799	PGSC0003DMG400025973	GRAS family transcription factor	Transcription factor
stu-miR1919-5p	TGTCGCAGATGACTTTCGCCC	264.5	134.38	41.1284	Score: 2.5	PGSC0003DMT400092954	PGSC0003DMG400042525	Gene of unknown function	unknown
stu-miR1919-5p	TGTCGCAGATGACTTTCGCCC	264.5	134.38	41.1284	Score: 2.0	PGSC0003DMT400028009	PGSC0003DMG400010801	Conserved gene of unknown function	unknown
stu-miR1919-5p	TGTCGCAGATGACTTTCGCCC	264.5	134.38	41.1284	Score: 2.0	PGSC0003DMT400028010	PGSC0003DMG400010801	Conserved gene of unknown function	unknown
stu-miR1919-5p	TGTCGCAGATGACTTTCGCCC	264.5	134.38	41.1284	Score: 2.0	PGSC0003DMT400028011	PGSC0003DMG400010801	Conserved gene of unknown function	unknown
stu-miR1919-5p	TGTCGCAGATGACTTTCGCCC	264.5	134.38	41.1284	Score: 2.0	PGSC0003DMT400028012	PGSC0003DMG400010801	Conserved gene of unknown function	unknown
stu-miR1919-5p	TGTCGCAGATGACTTTCGCCC	264.5	134.38	41.1284	Score: 1.0	PGSC0003DMT400005792	PGSC0003DMG400002263	Conserved gene of unknown function	unknown
stu-miR1919-5p	TGTCGCAGATGACTTTCGCCC	264.5	134.38	41.1284	Score: 1.0	PGSC0003DMT400005795	PGSC0003DMG400002264	Conserved gene of unknown function	unknown
stu-miR319-3p	TTGGACTGAAGGGTTCCCTTC	2.33849	8.05637	11.751	Score: 2.5	PGSC0003DMT400013500	PGSC0003DMG400005269	Glucose-6-phosphate/phosphate translocator 2	cell wall and Membrane
stu-miR319-3p	TTGGACTGAAGGGTTCCCTTC	2.33849	8.05637	11.751	Score: 2.5	PGSC0003DMT400065527	PGSC0003DMG400025495	Glucose-6-phosphate/phosphate translocator 2	cell wall and Membrane
stu-miR319-3p	TTGGACTGAAGGGTTCCCTTC	2.33849	8.05637	11.751	Score: 2.5	PGSC0003DMT400065528	PGSC0003DMG400025495	Glucose-6-phosphate/phosphate translocator 2	cell wall and Membrane
stu-miR319-3p	TTGGACTGAAGGGTTCCCTTC	2.33849	8.05637	11.751	Score: 2.5	PGSC0003DMT400090218	PGSC0003DMG400039789	UDP-glucose glucosyltransferase	cell wall and Membrane
stu-miR319-3p	TTGGACTGAAGGGTTCCCTTC	2.33849	8.05637	11.751	Score: 1.5	PGSC0003DMT400032268	PGSC0003DMG400012396	Lanceolate	growth
stu-miR319-3p	TTGGACTGAAGGGTTCCCTTC	2.33849	8.05637	11.751	Score: 1.5	PGSC0003DMT400032269	PGSC0003DMG400012396	Lanceolate	growth
stu-miR319-3p	TTGGACTGAAGGGTTCCCTTC	2.33849	8.05637	11.751	Score: 1.2	PGSC0003DMT400051252	PGSC0003DMG400019904	Transcription factor	Transcription factor
stu-miR319-3p	TTGGACTGAAGGGTTCCCTTC	2.33849	8.05637	11.751	Score: 1.2	PGSC0003DMT400051253	PGSC0003DMG400019904	Transcription factor	Transcription factor
stu-miR319-3p	TTGGACTGAAGGGTTCCCTTC	2.33849	8.05637	11.751	Score: 1.5	PGSC0003DMT400039786	PGSC0003DMG400015377	SlTCP3	other
stu-miR398b-3p	TTGTGTTCTCAGGTCACCCCT	3.00664	5.3172	0.961443	Score: 2.5	PGSC0003DMT400010988	PGSC0003DMG400004304	Endoplasmic oxidoreductin 1	other
stu-miR4376-5p	TACGCAGGAGAGATGATGCTG	64.6427	35.2869	14.5285	Score: 2.5	PGSC0003DMT400050026	PGSC0003DMG400019438	Prenylated Rab acceptor protein	other
stu-miR4376-5p	TACGCAGGAGAGATGATGCTG	64.6427	35.2869	14.5285	Score: 2.5	PGSC0003DMT400075651	PGSC0003DMG400029425	Galactose oxidase	cell wall and Membrane
stu-miR477b-5p	ACTCTCCCTCAAAGGCTTCTG	1.00221	0.725073	0.534135	Score: 2.5	PGSC0003DMT400007780	PGSC0003DMG400003006	Calmodulin binding protein	growth
stu-miR477b-5p	ACTCTCCCTCAAAGGCTTCTG	1.00221	0.725073	0.534135	Score: 1.2	PGSC0003DMT400004500	PGSC0003DMG400001792	Replication factor C subunit	growth
stu-miR477b-5p	ACTCTCCCTCAAAGGCTTCTG	1.00221	0.725073	0.534135	Score: 1.0	PGSC0003DMT400039455	PGSC0003DMG400015255	DELLA protein RGL1	hormone response
stu-miR482a-3p	TTTCCAATTCCACCCATTCCTA	148.411	74.038	40.5943	Score: 2.5	PGSC0003DMT400029066	PGSC0003DMG400011185	Low-molecular-weight cysteine-rich protein LCR78	other
stu-miR482a-3p	TTTCCAATTCCACCCATTCCTA	148.411	74.038	40.5943	Score: 2.5	PGSC0003DMT400029067	PGSC0003DMG400011185	Low-molecular-weight cysteine-rich protein LCR78	other
stu-miR482a-3p	TTTCCAATTCCACCCATTCCTA	148.411	74.038	40.5943	Score: 2.5	PGSC0003DMT400029068	PGSC0003DMG400011185	Low-molecular-weight cysteine-rich protein LCR78	other
stu-miR482a-3p	TTTCCAATTCCACCCATTCCTA	148.411	74.038	40.5943	Score: 2.5	PGSC0003DMT400066926	PGSC0003DMG401026018	Nucleotidyltransferase	other
stu-miR482a-3p	TTTCCAATTCCACCCATTCCTA	148.411	74.038	40.5943	Score: 2.5	PGSC0003DMT400067962	PGSC0003DMG401026432	ATP binding protein	other
stu-miR482a-3p	TTTCCAATTCCACCCATTCCTA	148.411	74.038	40.5943	Score: 2.5	PGSC0003DMT400067981	PGSC0003DMG400026433	ATP binding protein	other
stu-miR482a-3p	TTTCCAATTCCACCCATTCCTA	148.411	74.038	40.5943	Score: 2.5	PGSC0003DMT400067982	PGSC0003DMG400026433	ATP binding protein	other
stu-miR482a-3p	TTTCCAATTCCACCCATTCCTA	148.411	74.038	40.5943	Score: 2.5	PGSC0003DMT400067983	PGSC0003DMG400026433	ATP binding protein	other
stu-miR482a-3p	TTTCCAATTCCACCCATTCCTA	148.411	74.038	40.5943	Score: 2.5	PGSC0003DMT400017538	PGSC0003DMG400006800	NBS-LRR protein	NBS-LRR protein
stu-miR482a-3p	TTTCCAATTCCACCCATTCCTA	148.411	74.038	40.5943	Score: 2.5	PGSC0003DMT400020005	PGSC0003DMG400007743	Tir-nbs-lrr resistance protein	NBS-LRR protein
stu-miR482a-3p	TTTCCAATTCCACCCATTCCTA	148.411	74.038	40.5943	Score: 2.5	PGSC0003DMT400027994	PGSC0003DMG400010792	Cell cycle switch 52A	growth
stu-miR482a-3p	TTTCCAATTCCACCCATTCCTA	148.411	74.038	40.5943	Score: 2.5	PGSC0003DMT400042194	PGSC0003DMG400016372	Resistance protein PSH-RGH7	R gene
stu-miR482a-3p	TTTCCAATTCCACCCATTCCTA	148.411	74.038	40.5943	Score: 2.5	PGSC0003DMT400043784	PGSC0003DMG400016993	Pto-like serine/threonine kinase	kinase
stu-miR482a-3p	TTTCCAATTCCACCCATTCCTA	148.411	74.038	40.5943	Score: 2.5	PGSC0003DMT400053047	PGSC0003DMG401020581	Tir-nbs-lrr resistance protein	NBS-LRR protein
stu-miR482a-3p	TTTCCAATTCCACCCATTCCTA	148.411	74.038	40.5943	Score: 2.5	PGSC0003DMT400059223	PGSC0003DMG400023006	F-box/LRR-repeat protein	Transcription factor
stu-miR482a-3p	TTTCCAATTCCACCCATTCCTA	148.411	74.038	40.5943	Score: 2.5	PGSC0003DMT400079774	PGSC0003DMG400031065	Pectate lyase	cell wall and Membrane
stu-miR482a-3p	TTTCCAATTCCACCCATTCCTA	148.411	74.038	40.5943	Score: 2.5	PGSC0003DMT400079776	PGSC0003DMG400031065	Pectate lyase	cell wall and Membrane
stu-miR482a-3p	TTTCCAATTCCACCCATTCCTA	148.411	74.038	40.5943	Score: 2.5	PGSC0003DMT400007326	PGSC0003DMG400002820	Conserved gene of unknown function	unknown
stu-miR482a-3p	TTTCCAATTCCACCCATTCCTA	148.411	74.038	40.5943	Score: 2.5	PGSC0003DMT400007328	PGSC0003DMG400002820	Conserved gene of unknown function	unknown
stu-miR482a-3p	TTTCCAATTCCACCCATTCCTA	148.411	74.038	40.5943	Score: 2.5	PGSC0003DMT400007331	PGSC0003DMG400002820	Conserved gene of unknown function	unknown
stu-miR482a-3p	TTTCCAATTCCACCCATTCCTA	148.411	74.038	40.5943	Score: 2.5	PGSC0003DMT400040204	PGSC0003DMG400015556	Conserved gene of unknown function	unknown
stu-miR482a-3p	TTTCCAATTCCACCCATTCCTA	148.411	74.038	40.5943	Score: 2.0	PGSC0003DMT400053954	PGSC0003DMG400020935	Tir-nbs-lrr resistance protein	NBS-LRR protein
stu-miR482a-3p	TTTCCAATTCCACCCATTCCTA	148.411	74.038	40.5943	Score: 2.0	PGSC0003DMT400012486	PGSC0003DMG400004874	Resistance protein PSH-RGH7	R gene
stu-miR482a-3p	TTTCCAATTCCACCCATTCCTA	148.411	74.038	40.5943	Score: 2.0	PGSC0003DMT400053418	PGSC0003DMG400020722	TMV resistance protein N	R gene
stu-miR482a-3p	TTTCCAATTCCACCCATTCCTA	148.411	74.038	40.5943	Score: 2.0	PGSC0003DMT400053419	PGSC0003DMG400020722	TMV resistance protein N	R gene
stu-miR482a-3p	TTTCCAATTCCACCCATTCCTA	148.411	74.038	40.5943	Score: 2.0	PGSC0003DMT400053420	PGSC0003DMG400020722	TMV resistance protein N	R gene
stu-miR482a-3p	TTTCCAATTCCACCCATTCCTA	148.411	74.038	40.5943	Score: 2.2	PGSC0003DMT400013964	PGSC0003DMG400005470	Rab GTPase activator	R gene
stu-miR482a-3p	TTTCCAATTCCACCCATTCCTA	148.411	74.038	40.5943	Score: 2.2	PGSC0003DMT400013965	PGSC0003DMG400005470	Rab GTPase activator	R gene
stu-miR482a-3p	TTTCCAATTCCACCCATTCCTA	148.411	74.038	40.5943	Score: 2.2	PGSC0003DMT400015396	PGSC0003DMG400006003	Nematode resistance	R gene
stu-miR482a-3p	TTTCCAATTCCACCCATTCCTA	148.411	74.038	40.5943	Score: 2.2	PGSC0003DMT400015397	PGSC0003DMG400006003	Nematode resistance	R gene
stu-miR482a-3p	TTTCCAATTCCACCCATTCCTA	148.411	74.038	40.5943	Score: 2.2	PGSC0003DMT400025436	PGSC0003DMG402009818	RGC1	R gene
stu-miR482a-3p	TTTCCAATTCCACCCATTCCTA	148.411	74.038	40.5943	Score: 2.2	PGSC0003DMT400025437	PGSC0003DMG402009818	RGC1	R gene
stu-miR482a-3p	TTTCCAATTCCACCCATTCCTA	148.411	74.038	40.5943	Score: 2.2	PGSC0003DMT400025438	PGSC0003DMG402009818	RGC1	R gene
stu-miR482a-3p	TTTCCAATTCCACCCATTCCTA	148.411	74.038	40.5943	Score: 2.2	PGSC0003DMT400025439	PGSC0003DMG402009818	RGC1	R gene
stu-miR482a-3p	TTTCCAATTCCACCCATTCCTA	148.411	74.038	40.5943	Score: 2.2	PGSC0003DMT400046894	PGSC0003DMG400018216	TMV resistance protein N	R gene
stu-miR482a-3p	TTTCCAATTCCACCCATTCCTA	148.411	74.038	40.5943	Score: 2.2	PGSC0003DMT400053416	PGSC0003DMG401020721	Leucine-rich repeat-containing protein	NBS-LRR protein
stu-miR482a-3p	TTTCCAATTCCACCCATTCCTA	148.411	74.038	40.5943	Score: 2.2	PGSC0003DMT400058647	PGSC0003DMG400022785	Resistance protein PSH-RGH6	R gene
stu-miR482a-3p	TTTCCAATTCCACCCATTCCTA	148.411	74.038	40.5943	Score: 1.8	PGSC0003DMT400095266	PGSC0003DMG400044837	Nematode resistance	R gene
stu-miR482b-3p	TTACCGATTCCCCCCATTCCAA	15.1167	9.50651	3.31164	Score: 2.5	PGSC0003DMT400005052	PGSC0003DMG400001996	Resistance protein PSH-RGH6	R gene
stu-miR482b-3p	TTACCGATTCCCCCCATTCCAA	15.1167	9.50651	3.31164	Score: 2.5	PGSC0003DMT400012486	PGSC0003DMG400004874	Resistance protein PSH-RGH7	R gene
stu-miR482b-3p	TTACCGATTCCCCCCATTCCAA	15.1167	9.50651	3.31164	Score: 2.5	PGSC0003DMT400036467	PGSC0003DMG400014047	Disease resistance protein R3a	R gene
stu-miR482b-3p	TTACCGATTCCCCCCATTCCAA	15.1167	9.50651	3.31164	Score: 2.5	PGSC0003DMT400058450	PGSC0003DMG400022699	Resistance gene	R gene
stu-miR482b-3p	TTACCGATTCCCCCCATTCCAA	15.1167	9.50651	3.31164	Score: 2.5	PGSC0003DMT400068337	PGSC0003DMG400026573	Resistance protein PSH-RGH6	R gene
stu-miR482b-3p	TTACCGATTCCCCCCATTCCAA	15.1167	9.50651	3.31164	Score: 2.5	PGSC0003DMT400070399	PGSC0003DMG401027371	CC-NBS-LRR protein	NBS-LRR protein
stu-miR482b-3p	TTACCGATTCCCCCCATTCCAA	15.1167	9.50651	3.31164	Score: 2.5	PGSC0003DMT400077808	PGSC0003DMG400030267	Bacterial spot disease resistance protein 4	R gene
stu-miR482b-3p	TTACCGATTCCCCCCATTCCAA	15.1167	9.50651	3.31164	Score: 2.5	PGSC0003DMT400079091	PGSC0003DMG400030780	Gene of unknown function	unknown
stu-miR482b-3p	TTACCGATTCCCCCCATTCCAA	15.1167	9.50651	3.31164	Score: 2.0	PGSC0003DMT400040529	PGSC0003DMG401015682	NL25	other
stu-miR482b-3p	TTACCGATTCCCCCCATTCCAA	15.1167	9.50651	3.31164	Score: 2.0	PGSC0003DMT400040557	PGSC0003DMG401015682	NL25	other
stu-miR482b-3p	TTACCGATTCCCCCCATTCCAA	15.1167	9.50651	3.31164	Score: 2.0	PGSC0003DMT400002320	PGSC0003DMG400000888	Resistance gene	R gene
stu-miR482b-3p	TTACCGATTCCCCCCATTCCAA	15.1167	9.50651	3.31164	Score: 2.0	PGSC0003DMT400036058	PGSC0003DMG400013889	Disease resistance protein Gpa2	R gene
stu-miR482b-3p	TTACCGATTCCCCCCATTCCAA	15.1167	9.50651	3.31164	Score: 2.0	PGSC0003DMT400050509	PGSC0003DMG400019627	Disease resistance protein Gpa2	R gene
stu-miR482b-3p	TTACCGATTCCCCCCATTCCAA	15.1167	9.50651	3.31164	Score: 2.0	PGSC0003DMT400050510	PGSC0003DMG400019627	Disease resistance protein Gpa2	R gene
stu-miR482b-3p	TTACCGATTCCCCCCATTCCAA	15.1167	9.50651	3.31164	Score: 2.0	PGSC0003DMT400093829	PGSC0003DMG400043400	Disease resistance protein RGA2	R gene
stu-miR482b-3p	TTACCGATTCCCCCCATTCCAA	15.1167	9.50651	3.31164	Score: 1.5	PGSC0003DMT400006234	PGSC0003DMG402002428	NL25	other
stu-miR482b-3p	TTACCGATTCCCCCCATTCCAA	15.1167	9.50651	3.31164	Score: 1.5	PGSC0003DMT400035243	PGSC0003DMG400013543	NL27	other
stu-miR482b-3p	TTACCGATTCCCCCCATTCCAA	15.1167	9.50651	3.31164	Score: 1.5	PGSC0003DMT400035244	PGSC0003DMG400013543	NL27	other
stu-miR482b-3p	TTACCGATTCCCCCCATTCCAA	15.1167	9.50651	3.31164	Score: 1.5	PGSC0003DMT400035245	PGSC0003DMG400013543	NL27	other
stu-miR482b-3p	TTACCGATTCCCCCCATTCCAA	15.1167	9.50651	3.31164	Score: 1.5	PGSC0003DMT400040590	PGSC0003DMG400015693	Resistance gene	R gene
stu-miR482d-3p	TCTTGCCTACACCGCCCATGCC	52.5326	41.9737	10.8964	Score: 2.5	PGSC0003DMT400030022	PGSC0003DMG400011521	EDNR2GH5 protein	other
stu-miR482d-3p	TCTTGCCTACACCGCCCATGCC	52.5326	41.9737	10.8964	Score: 2.5	PGSC0003DMT400030039	PGSC0003DMG401011526	SNKR2GH2 protein	other
stu-miR482d-3p	TCTTGCCTACACCGCCCATGCC	52.5326	41.9737	10.8964	Score: 2.5	PGSC0003DMT400031116	PGSC0003DMG400011920	SNKR2GH5 protein	other
stu-miR482d-3p	TCTTGCCTACACCGCCCATGCC	52.5326	41.9737	10.8964	Score: 2.5	PGSC0003DMT400031132	PGSC0003DMG400011924	SNKR2GH2 protein	other
stu-miR482d-3p	TCTTGCCTACACCGCCCATGCC	52.5326	41.9737	10.8964	Score: 2.5	PGSC0003DMT400018940	PGSC0003DMG400007344	Disease resistance protein R3a	R gene
stu-miR482d-3p	TCTTGCCTACACCGCCCATGCC	52.5326	41.9737	10.8964	Score: 2.5	PGSC0003DMT400030019	PGSC0003DMG400011520	Rpi protein	R gene
stu-miR482d-3p	TCTTGCCTACACCGCCCATGCC	52.5326	41.9737	10.8964	Score: 2.5	PGSC0003DMT400030047	PGSC0003DMG400011529	R2	R gene
stu-miR482d-3p	TCTTGCCTACACCGCCCATGCC	52.5326	41.9737	10.8964	Score: 2.5	PGSC0003DMT400035714	PGSC0003DMG400013736	BED finger-nbs-lrr resistance protein	R gene
stu-miR482d-3p	TCTTGCCTACACCGCCCATGCC	52.5326	41.9737	10.8964	Score: 2.5	PGSC0003DMT400047774	PGSC0003DMG400018572	Disease resistance protein I2C-5	R gene
stu-miR482d-3p	TCTTGCCTACACCGCCCATGCC	52.5326	41.9737	10.8964	Score: 2.5	PGSC0003DMT400047788	PGSC0003DMG402018576	Potato late blight resistance protein R3a	R gene
stu-miR482d-3p	TCTTGCCTACACCGCCCATGCC	52.5326	41.9737	10.8964	Score: 2.5	PGSC0003DMT400050640	PGSC0003DMG400019669	Potato resistance I2GA-SH23-3	R gene
stu-miR482d-3p	TCTTGCCTACACCGCCCATGCC	52.5326	41.9737	10.8964	Score: 2.5	PGSC0003DMT400059833	PGSC0003DMG400023273	HJTR2GH1 protein	NBS-LRR protein
stu-miR482d-3p	TCTTGCCTACACCGCCCATGCC	52.5326	41.9737	10.8964	Score: 2.5	PGSC0003DMT400070399	PGSC0003DMG401027371	CC-NBS-LRR protein	NBS-LRR protein
stu-miR482d-3p	TCTTGCCTACACCGCCCATGCC	52.5326	41.9737	10.8964	Score: 2.5	PGSC0003DMT400070503	PGSC0003DMG400027407	Plant disease resistant protein	R gene
stu-miR482d-3p	TCTTGCCTACACCGCCCATGCC	52.5326	41.9737	10.8964	Score: 2.0	PGSC0003DMT400028423	PGSC0003DMG400010946	EDNR2GH3 protein	other
stu-miR482d-3p	TCTTGCCTACACCGCCCATGCC	52.5326	41.9737	10.8964	Score: 2.0	PGSC0003DMT400062272	PGSC0003DMG400024231	EDNR2GH7 protein	other
stu-miR482d-3p	TCTTGCCTACACCGCCCATGCC	52.5326	41.9737	10.8964	Score: 2.0	PGSC0003DMT400082495	PGSC0003DMG400032572	EDNR2GH7 protein	other
stu-miR482d-3p	TCTTGCCTACACCGCCCATGCC	52.5326	41.9737	10.8964	Score: 2.0	PGSC0003DMT400025432	PGSC0003DMG401009818	Disease resistance protein BS2	R gene
stu-miR482d-3p	TCTTGCCTACACCGCCCATGCC	52.5326	41.9737	10.8964	Score: 2.0	PGSC0003DMT400025433	PGSC0003DMG401009818	Disease resistance protein BS2	R gene
stu-miR482d-3p	TCTTGCCTACACCGCCCATGCC	52.5326	41.9737	10.8964	Score: 2.0	PGSC0003DMT400030044	PGSC0003DMG400011528	R2	R gene
stu-miR482d-3p	TCTTGCCTACACCGCCCATGCC	52.5326	41.9737	10.8964	Score: 2.0	PGSC0003DMT400082499	PGSC0003DMG400032576	Rpi protein	R gene
stu-miR482d-3p	TCTTGCCTACACCGCCCATGCC	52.5326	41.9737	10.8964	Score: 2.0	PGSC0003DMT400082507	PGSC0003DMG400032584	R2 late blight resistance protein	R gene
stu-miR482d-3p	TCTTGCCTACACCGCCCATGCC	52.5326	41.9737	10.8964	Score: 2.2	PGSC0003DMT400005013	PGSC0003DMG400001983	Disease resistance protein BS2	R gene
stu-miR482d-3p	TCTTGCCTACACCGCCCATGCC	52.5326	41.9737	10.8964	Score: 2.2	PGSC0003DMT400007823	PGSC0003DMG401003025	Conserved gene of unknown function	unknown
stu-miR482d-3p	TCTTGCCTACACCGCCCATGCC	52.5326	41.9737	10.8964	Score: 2.2	PGSC0003DMT400007829	PGSC0003DMG401003025	Conserved gene of unknown function	unknown
stu-miR482d-3p	TCTTGCCTACACCGCCCATGCC	52.5326	41.9737	10.8964	Score: 2.2	PGSC0003DMT400015422	PGSC0003DMG400006019	Binding protein	other
stu-miR482d-3p	TCTTGCCTACACCGCCCATGCC	52.5326	41.9737	10.8964	Score: 2.2	PGSC0003DMT400015423	PGSC0003DMG400006019	Binding protein	other
stu-miR482d-3p	TCTTGCCTACACCGCCCATGCC	52.5326	41.9737	10.8964	Score: 2.2	PGSC0003DMT400019593	PGSC0003DMG401007575	Cc-nbs-lrr resistance protein	NBS-LRR protein
stu-miR482d-3p	TCTTGCCTACACCGCCCATGCC	52.5326	41.9737	10.8964	Score: 2.2	PGSC0003DMT400019594	PGSC0003DMG401007575	Cc-nbs-lrr resistance protein	NBS-LRR protein
stu-miR482d-3p	TCTTGCCTACACCGCCCATGCC	52.5326	41.9737	10.8964	Score: 2.2	PGSC0003DMT400019595	PGSC0003DMG401007575	Cc-nbs-lrr resistance protein	NBS-LRR protein
stu-miR482d-3p	TCTTGCCTACACCGCCCATGCC	52.5326	41.9737	10.8964	Score: 2.2	PGSC0003DMT400019596	PGSC0003DMG401007575	Cc-nbs-lrr resistance protein	NBS-LRR protein
stu-miR482d-3p	TCTTGCCTACACCGCCCATGCC	52.5326	41.9737	10.8964	Score: 2.2	PGSC0003DMT400019597	PGSC0003DMG401007575	Cc-nbs-lrr resistance protein	NBS-LRR protein
stu-miR482d-3p	TCTTGCCTACACCGCCCATGCC	52.5326	41.9737	10.8964	Score: 2.2	PGSC0003DMT400019598	PGSC0003DMG401007575	Cc-nbs-lrr resistance protein	NBS-LRR protein
stu-miR482d-3p	TCTTGCCTACACCGCCCATGCC	52.5326	41.9737	10.8964	Score: 2.2	PGSC0003DMT400019599	PGSC0003DMG401007575	Cc-nbs-lrr resistance protein	NBS-LRR protein
stu-miR482d-3p	TCTTGCCTACACCGCCCATGCC	52.5326	41.9737	10.8964	Score: 2.2	PGSC0003DMT400019600	PGSC0003DMG401007575	Cc-nbs-lrr resistance protein	NBS-LRR protein
stu-miR482d-3p	TCTTGCCTACACCGCCCATGCC	52.5326	41.9737	10.8964	Score: 2.2	PGSC0003DMT400038440	PGSC0003DMG400014838	Pentatricopeptide repeat-containing protein	growth
stu-miR482d-3p	TCTTGCCTACACCGCCCATGCC	52.5326	41.9737	10.8964	Score: 2.2	PGSC0003DMT400038441	PGSC0003DMG400014838	Pentatricopeptide repeat-containing protein	growth
stu-miR482d-3p	TCTTGCCTACACCGCCCATGCC	52.5326	41.9737	10.8964	Score: 2.2	PGSC0003DMT400038442	PGSC0003DMG400014838	Pentatricopeptide repeat-containing protein	growth
stu-miR482d-3p	TCTTGCCTACACCGCCCATGCC	52.5326	41.9737	10.8964	Score: 2.2	PGSC0003DMT400038443	PGSC0003DMG400014838	Pentatricopeptide repeat-containing protein	growth
stu-miR482d-3p	TCTTGCCTACACCGCCCATGCC	52.5326	41.9737	10.8964	Score: 2.2	PGSC0003DMT400038444	PGSC0003DMG400014838	Pentatricopeptide repeat-containing protein	growth
stu-miR482d-3p	TCTTGCCTACACCGCCCATGCC	52.5326	41.9737	10.8964	Score: 2.2	PGSC0003DMT400043328	PGSC0003DMG400016823	Nucleotide binding site-leucine rich repeat protein	NBS-LRR protein
stu-miR482d-3p	TCTTGCCTACACCGCCCATGCC	52.5326	41.9737	10.8964	Score: 2.2	PGSC0003DMT400043329	PGSC0003DMG400016823	Nucleotide binding site-leucine rich repeat protein	NBS-LRR protein
stu-miR482d-3p	TCTTGCCTACACCGCCCATGCC	52.5326	41.9737	10.8964	Score: 2.2	PGSC0003DMT400043606	PGSC0003DMG401016933	Disease resistance protein; Calcium-binding EF-hand; AAA ATPase	R gene
stu-miR482d-3p	TCTTGCCTACACCGCCCATGCC	52.5326	41.9737	10.8964	Score: 2.2	PGSC0003DMT400043609	PGSC0003DMG401016933	Disease resistance protein; Calcium-binding EF-hand; AAA ATPase	R gene
stu-miR482d-3p	TCTTGCCTACACCGCCCATGCC	52.5326	41.9737	10.8964	Score: 2.2	PGSC0003DMT400043611	PGSC0003DMG401016933	Disease resistance protein; Calcium-binding EF-hand; AAA ATPase	R gene
stu-miR482d-3p	TCTTGCCTACACCGCCCATGCC	52.5326	41.9737	10.8964	Score: 2.2	PGSC0003DMT400048663	PGSC0003DMG400018903	Cc-nbs-lrr resistance protein	NBS-LRR protein
stu-miR482d-3p	TCTTGCCTACACCGCCCATGCC	52.5326	41.9737	10.8964	Score: 2.2	PGSC0003DMT400048664	PGSC0003DMG400018903	Cc-nbs-lrr resistance protein	NBS-LRR protein
stu-miR482d-3p	TCTTGCCTACACCGCCCATGCC	52.5326	41.9737	10.8964	Score: 2.2	PGSC0003DMT400075018	PGSC0003DMG400029178	Pentatricopeptide repeat-containing protein	growth
stu-miR482d-3p	TCTTGCCTACACCGCCCATGCC	52.5326	41.9737	10.8964	Score: 2.2	PGSC0003DMT400075019	PGSC0003DMG400029178	Pentatricopeptide repeat-containing protein	growth
stu-miR482d-3p	TCTTGCCTACACCGCCCATGCC	52.5326	41.9737	10.8964	Score: 2.2	PGSC0003DMT400077239	PGSC0003DMG400030044	HJTR2GH1 protein	NBS-LRR protein
stu-miR482d-3p	TCTTGCCTACACCGCCCATGCC	52.5326	41.9737	10.8964	Score: 2.2	PGSC0003DMT400082452	PGSC0003DMG402032547	HJTR2GH1 protein	NBS-LRR protein
stu-miR482d-3p	TCTTGCCTACACCGCCCATGCC	52.5326	41.9737	10.8964	Score: 1.8	PGSC0003DMT400005011	PGSC0003DMG400001981	NBS-LRR protein	NBS-LRR protein
stu-miR482d-3p	TCTTGCCTACACCGCCCATGCC	52.5326	41.9737	10.8964	Score: 1.8	PGSC0003DMT400005046	PGSC0003DMG400001994	NBS-LRR protein	NBS-LRR protein
stu-miR482d-3p	TCTTGCCTACACCGCCCATGCC	52.5326	41.9737	10.8964	Score: 1.8	PGSC0003DMT400019678	PGSC0003DMG400007605	NBS-LRR protein	NBS-LRR protein
stu-miR482d-3p	TCTTGCCTACACCGCCCATGCC	52.5326	41.9737	10.8964	Score: 1.2	PGSC0003DMT400030027	PGSC0003DMG401011522	HJTR2GH1 protein	NBS-LRR protein
stu-miR482d-3p	TCTTGCCTACACCGCCCATGCC	52.5326	41.9737	10.8964	Score: 1.2	PGSC0003DMT400030029	PGSC0003DMG401011522	HJTR2GH1 protein	NBS-LRR protein
stu-miR482d-3p	TCTTGCCTACACCGCCCATGCC	52.5326	41.9737	10.8964	Score: 1.5	PGSC0003DMT400030030	PGSC0003DMG400011523	HJTR2GH1 protein	NBS-LRR protein
stu-miR482d-3p	TCTTGCCTACACCGCCCATGCC	52.5326	41.9737	10.8964	Score: 1.8	PGSC0003DMT400046494	PGSC0003DMG400018046	NBS-coding resistance gene analog	NBS-LRR protein
stu-miR482d-3p	TCTTGCCTACACCGCCCATGCC	52.5326	41.9737	10.8964	Score: 1.2	PGSC0003DMT400055333	PGSC0003DMG400021477	Cc-nbs-lrr resistance protein	NBS-LRR protein
stu-miR482d-3p	TCTTGCCTACACCGCCCATGCC	52.5326	41.9737	10.8964	Score: 1.2	PGSC0003DMT400055334	PGSC0003DMG400021477	Cc-nbs-lrr resistance protein	NBS-LRR protein
stu-miR482d-3p	TCTTGCCTACACCGCCCATGCC	52.5326	41.9737	10.8964	Score: 1.2	PGSC0003DMT400055336	PGSC0003DMG400021477	Cc-nbs-lrr resistance protein	NBS-LRR protein
stu-miR482d-3p	TCTTGCCTACACCGCCCATGCC	52.5326	41.9737	10.8964	Score: 1.8	PGSC0003DMT400062762	PGSC0003DMG400024429	NBS-coding resistance gene analog	NBS-LRR protein
stu-miR482d-3p	TCTTGCCTACACCGCCCATGCC	52.5326	41.9737	10.8964	Score: 1.8	PGSC0003DMT400062763	PGSC0003DMG400024429	NBS-coding resistance gene analog	NBS-LRR protein
stu-miR482d-3p	TCTTGCCTACACCGCCCATGCC	52.5326	41.9737	10.8964	Score: 1.8	PGSC0003DMT400062764	PGSC0003DMG400024429	NBS-coding resistance gene analog	NBS-LRR protein
stu-miR482d-3p	TCTTGCCTACACCGCCCATGCC	52.5326	41.9737	10.8964	Score: 1.8	PGSC0003DMT400062765	PGSC0003DMG400024429	NBS-coding resistance gene analog	NBS-LRR protein
stu-miR482d-3p	TCTTGCCTACACCGCCCATGCC	52.5326	41.9737	10.8964	Score: 1.5	PGSC0003DMT400016707	PGSC0003DMG400006531	SNKR2GH5 protein	other
stu-miR482d-3p	TCTTGCCTACACCGCCCATGCC	52.5326	41.9737	10.8964	Score: 1.5	PGSC0003DMT400030042	PGSC0003DMG400011527	SNKR2GH5 protein	other
stu-miR482d-3p	TCTTGCCTACACCGCCCATGCC	52.5326	41.9737	10.8964	Score: 1.8	PGSC0003DMT400005006	PGSC0003DMG402001979	Disease resistance protein BS2	R gene
stu-miR482d-3p	TCTTGCCTACACCGCCCATGCC	52.5326	41.9737	10.8964	Score: 1.8	PGSC0003DMT400005732	PGSC0003DMG401002242	Disease resistance protein BS2	R gene
stu-miR482d-3p	TCTTGCCTACACCGCCCATGCC	52.5326	41.9737	10.8964	Score: 1.5	PGSC0003DMT400007707	PGSC0003DMG400002980	Disease resistance protein R3a	R gene
stu-miR482d-3p	TCTTGCCTACACCGCCCATGCC	52.5326	41.9737	10.8964	Score: 1.5	PGSC0003DMT400024448	PGSC0003DMG400009455	Disease resistance protein R3a	R gene
stu-miR482d-3p	TCTTGCCTACACCGCCCATGCC	52.5326	41.9737	10.8964	Score: 1.2	PGSC0003DMT400062766	PGSC0003DMG400024430	Disease resistance protein BS2	R gene
stu-miR482d-3p	TCTTGCCTACACCGCCCATGCC	52.5326	41.9737	10.8964	Score: 1.8	PGSC0003DMT400078333	PGSC0003DMG400030497	Resistance protein PSH-RGH6	R gene
stu-miR482d-3p	TCTTGCCTACACCGCCCATGCC	52.5326	41.9737	10.8964	Score: 1.8	PGSC0003DMT400078334	PGSC0003DMG400030498	Disease resistance protein BS2	R gene
stu-miR482e-3p	TCTTGCCAATACCGCCCATTCC	124.107	99.8184	33.0095	Score: 2.5	PGSC0003DMT400005013	PGSC0003DMG400001983	Disease resistance protein BS2	R gene
stu-miR482e-3p	TCTTGCCAATACCGCCCATTCC	124.107	99.8184	33.0095	Score: 2.5	PGSC0003DMT400020349	PGSC0003DMG400007870	NBS-LRR protein	NBS-LRR protein
stu-miR482e-3p	TCTTGCCAATACCGCCCATTCC	124.107	99.8184	33.0095	Score: 2.5	PGSC0003DMT400020359	PGSC0003DMG400007872	NBS-LRR protein	NBS-LRR protein
stu-miR482e-3p	TCTTGCCAATACCGCCCATTCC	124.107	99.8184	33.0095	Score: 2.5	PGSC0003DMT400020360	PGSC0003DMG400007872	NBS-LRR protein	NBS-LRR protein
stu-miR482e-3p	TCTTGCCAATACCGCCCATTCC	124.107	99.8184	33.0095	Score: 2.5	PGSC0003DMT400030027	PGSC0003DMG401011522	HJTR2GH1 protein	NBS-LRR protein
stu-miR482e-3p	TCTTGCCAATACCGCCCATTCC	124.107	99.8184	33.0095	Score: 2.5	PGSC0003DMT400030029	PGSC0003DMG401011522	HJTR2GH1 protein	NBS-LRR protein
stu-miR482e-3p	TCTTGCCAATACCGCCCATTCC	124.107	99.8184	33.0095	Score: 2.5	PGSC0003DMT400030044	PGSC0003DMG400011528	R2	R gene
stu-miR482e-3p	TCTTGCCAATACCGCCCATTCC	124.107	99.8184	33.0095	Score: 2.5	PGSC0003DMT400062180	PGSC0003DMG400024202	Disease resistance protein BS2	R gene
stu-miR482e-3p	TCTTGCCAATACCGCCCATTCC	124.107	99.8184	33.0095	Score: 2.5	PGSC0003DMT400070419	PGSC0003DMG400027377	Disease resistance protein R3a	R gene
stu-miR482e-3p	TCTTGCCAATACCGCCCATTCC	124.107	99.8184	33.0095	Score: 2.5	PGSC0003DMT400096619	PGSC0003DMG400046190	Gene of unknown function	unknown
stu-miR482e-3p	TCTTGCCAATACCGCCCATTCC	124.107	99.8184	33.0095	Score: 2.0	PGSC0003DMT400005011	PGSC0003DMG400001981	NBS-LRR protein	NBS-LRR protein
stu-miR482e-3p	TCTTGCCAATACCGCCCATTCC	124.107	99.8184	33.0095	Score: 2.0	PGSC0003DMT400005046	PGSC0003DMG400001994	NBS-LRR protein	NBS-LRR protein
stu-miR482e-3p	TCTTGCCAATACCGCCCATTCC	124.107	99.8184	33.0095	Score: 2.0	PGSC0003DMT400007823	PGSC0003DMG401003025	Conserved gene of unknown function	unknown
stu-miR482e-3p	TCTTGCCAATACCGCCCATTCC	124.107	99.8184	33.0095	Score: 2.0	PGSC0003DMT400007829	PGSC0003DMG401003025	Conserved gene of unknown function	unknown
stu-miR482e-3p	TCTTGCCAATACCGCCCATTCC	124.107	99.8184	33.0095	Score: 2.0	PGSC0003DMT400010966	PGSC0003DMG400004295	NBS-LRR protein	NBS-LRR protein
stu-miR482e-3p	TCTTGCCAATACCGCCCATTCC	124.107	99.8184	33.0095	Score: 2.0	PGSC0003DMT400016707	PGSC0003DMG400006531	SNKR2GH5 protein	other
stu-miR482e-3p	TCTTGCCAATACCGCCCATTCC	124.107	99.8184	33.0095	Score: 2.0	PGSC0003DMT400019593	PGSC0003DMG401007575	Cc-nbs-lrr resistance protein	NBS-LRR protein
stu-miR482e-3p	TCTTGCCAATACCGCCCATTCC	124.107	99.8184	33.0095	Score: 2.0	PGSC0003DMT400019594	PGSC0003DMG401007575	Cc-nbs-lrr resistance protein	NBS-LRR protein
stu-miR482e-3p	TCTTGCCAATACCGCCCATTCC	124.107	99.8184	33.0095	Score: 2.0	PGSC0003DMT400019595	PGSC0003DMG401007575	Cc-nbs-lrr resistance protein	NBS-LRR protein
stu-miR482e-3p	TCTTGCCAATACCGCCCATTCC	124.107	99.8184	33.0095	Score: 2.0	PGSC0003DMT400019596	PGSC0003DMG401007575	Cc-nbs-lrr resistance protein	NBS-LRR protein
stu-miR482e-3p	TCTTGCCAATACCGCCCATTCC	124.107	99.8184	33.0095	Score: 2.0	PGSC0003DMT400019597	PGSC0003DMG401007575	Cc-nbs-lrr resistance protein	NBS-LRR protein
stu-miR482e-3p	TCTTGCCAATACCGCCCATTCC	124.107	99.8184	33.0095	Score: 2.0	PGSC0003DMT400019598	PGSC0003DMG401007575	Cc-nbs-lrr resistance protein	NBS-LRR protein
stu-miR482e-3p	TCTTGCCAATACCGCCCATTCC	124.107	99.8184	33.0095	Score: 2.0	PGSC0003DMT400019599	PGSC0003DMG401007575	Cc-nbs-lrr resistance protein	NBS-LRR protein
stu-miR482e-3p	TCTTGCCAATACCGCCCATTCC	124.107	99.8184	33.0095	Score: 2.0	PGSC0003DMT400019600	PGSC0003DMG401007575	Cc-nbs-lrr resistance protein	NBS-LRR protein
stu-miR482e-3p	TCTTGCCAATACCGCCCATTCC	124.107	99.8184	33.0095	Score: 2.0	PGSC0003DMT400019678	PGSC0003DMG400007605	NBS-LRR protein	NBS-LRR protein
stu-miR482e-3p	TCTTGCCAATACCGCCCATTCC	124.107	99.8184	33.0095	Score: 2.0	PGSC0003DMT400030042	PGSC0003DMG400011527	SNKR2GH5 protein	other
stu-miR482e-3p	TCTTGCCAATACCGCCCATTCC	124.107	99.8184	33.0095	Score: 2.0	PGSC0003DMT400043328	PGSC0003DMG400016823	Nucleotide binding site-leucine rich repeat protein	NBS-LRR protein
stu-miR482e-3p	TCTTGCCAATACCGCCCATTCC	124.107	99.8184	33.0095	Score: 2.0	PGSC0003DMT400043329	PGSC0003DMG400016823	Nucleotide binding site-leucine rich repeat protein	NBS-LRR protein
stu-miR482e-3p	TCTTGCCAATACCGCCCATTCC	124.107	99.8184	33.0095	Score: 2.0	PGSC0003DMT400046494	PGSC0003DMG400018046	NBS-coding resistance gene analog	NBS-LRR protein
stu-miR482e-3p	TCTTGCCAATACCGCCCATTCC	124.107	99.8184	33.0095	Score: 2.0	PGSC0003DMT400048663	PGSC0003DMG400018903	Cc-nbs-lrr resistance protein	NBS-LRR protein
stu-miR482e-3p	TCTTGCCAATACCGCCCATTCC	124.107	99.8184	33.0095	Score: 2.0	PGSC0003DMT400048664	PGSC0003DMG400018903	Cc-nbs-lrr resistance protein	NBS-LRR protein
stu-miR482e-3p	TCTTGCCAATACCGCCCATTCC	124.107	99.8184	33.0095	Score: 2.0	PGSC0003DMT400062762	PGSC0003DMG400024429	NBS-coding resistance gene analog	NBS-LRR protein
stu-miR482e-3p	TCTTGCCAATACCGCCCATTCC	124.107	99.8184	33.0095	Score: 2.0	PGSC0003DMT400062763	PGSC0003DMG400024429	NBS-coding resistance gene analog	NBS-LRR protein
stu-miR482e-3p	TCTTGCCAATACCGCCCATTCC	124.107	99.8184	33.0095	Score: 2.0	PGSC0003DMT400062764	PGSC0003DMG400024429	NBS-coding resistance gene analog	NBS-LRR protein
stu-miR482e-3p	TCTTGCCAATACCGCCCATTCC	124.107	99.8184	33.0095	Score: 2.0	PGSC0003DMT400062765	PGSC0003DMG400024429	NBS-coding resistance gene analog	NBS-LRR protein
stu-miR482e-3p	TCTTGCCAATACCGCCCATTCC	124.107	99.8184	33.0095	Score: 2.0	PGSC0003DMT400005006	PGSC0003DMG402001979	Disease resistance protein BS2	R gene
stu-miR482e-3p	TCTTGCCAATACCGCCCATTCC	124.107	99.8184	33.0095	Score: 2.0	PGSC0003DMT400005052	PGSC0003DMG400001996	Resistance protein PSH-RGH6	R gene
stu-miR482e-3p	TCTTGCCAATACCGCCCATTCC	124.107	99.8184	33.0095	Score: 2.0	PGSC0003DMT400005732	PGSC0003DMG401002242	Disease resistance protein BS2	R gene
stu-miR482e-3p	TCTTGCCAATACCGCCCATTCC	124.107	99.8184	33.0095	Score: 2.0	PGSC0003DMT400007707	PGSC0003DMG400002980	Disease resistance protein R3a	R gene
stu-miR482e-3p	TCTTGCCAATACCGCCCATTCC	124.107	99.8184	33.0095	Score: 2.0	PGSC0003DMT400024448	PGSC0003DMG400009455	Disease resistance protein R3a	R gene
stu-miR482e-3p	TCTTGCCAATACCGCCCATTCC	124.107	99.8184	33.0095	Score: 2.0	PGSC0003DMT400034063	PGSC0003DMG400013091	Disease resistance protein Gpa2	R gene
stu-miR482e-3p	TCTTGCCAATACCGCCCATTCC	124.107	99.8184	33.0095	Score: 2.0	PGSC0003DMT400034064	PGSC0003DMG400013091	Disease resistance protein Gpa2	R gene
stu-miR482e-3p	TCTTGCCAATACCGCCCATTCC	124.107	99.8184	33.0095	Score: 2.0	PGSC0003DMT400043606	PGSC0003DMG401016933	Disease resistance protein; Calcium-binding EF-hand; AAA ATPase	R gene
stu-miR482e-3p	TCTTGCCAATACCGCCCATTCC	124.107	99.8184	33.0095	Score: 2.0	PGSC0003DMT400043609	PGSC0003DMG401016933	Disease resistance protein; Calcium-binding EF-hand; AAA ATPase	R gene
stu-miR482e-3p	TCTTGCCAATACCGCCCATTCC	124.107	99.8184	33.0095	Score: 2.0	PGSC0003DMT400043611	PGSC0003DMG401016933	Disease resistance protein; Calcium-binding EF-hand; AAA ATPase	R gene
stu-miR482e-3p	TCTTGCCAATACCGCCCATTCC	124.107	99.8184	33.0095	Score: 2.0	PGSC0003DMT400075625	PGSC0003DMG400029415	Nematode resistance protein	R gene
stu-miR482e-3p	TCTTGCCAATACCGCCCATTCC	124.107	99.8184	33.0095	Score: 2.0	PGSC0003DMT400078333	PGSC0003DMG400030497	Resistance protein PSH-RGH6	R gene
stu-miR482e-3p	TCTTGCCAATACCGCCCATTCC	124.107	99.8184	33.0095	Score: 2.0	PGSC0003DMT400078334	PGSC0003DMG400030498	Disease resistance protein BS2	R gene
stu-miR482e-3p	TCTTGCCAATACCGCCCATTCC	124.107	99.8184	33.0095	Score: 2.2	PGSC0003DMT400062366	PGSC0003DMG400024273	Resistance protein PSH-RGH6	R gene
stu-miR482e-3p	TCTTGCCAATACCGCCCATTCC	124.107	99.8184	33.0095	Score: 1.5	PGSC0003DMT400002788	PGSC0003DMG400001081	NBS-LRR protein	NBS-LRR protein
stu-miR482e-3p	TCTTGCCAATACCGCCCATTCC	124.107	99.8184	33.0095	Score: 1.5	PGSC0003DMT400034059	PGSC0003DMG400013090	Leucine-rich repeat-containing protein	NBS-LRR protein
stu-miR482e-3p	TCTTGCCAATACCGCCCATTCC	124.107	99.8184	33.0095	Score: 1.8	PGSC0003DMT400025432	PGSC0003DMG401009818	Disease resistance protein BS2	R gene
stu-miR482e-3p	TCTTGCCAATACCGCCCATTCC	124.107	99.8184	33.0095	Score: 1.8	PGSC0003DMT400025433	PGSC0003DMG401009818	Disease resistance protein BS2	R gene
stu-miR482e-3p	TCTTGCCAATACCGCCCATTCC	124.107	99.8184	33.0095	Score: 0.8	PGSC0003DMT400025436	PGSC0003DMG402009818	RGC1	R gene
stu-miR482e-3p	TCTTGCCAATACCGCCCATTCC	124.107	99.8184	33.0095	Score: 0.8	PGSC0003DMT400025437	PGSC0003DMG402009818	RGC1	R gene
stu-miR482e-3p	TCTTGCCAATACCGCCCATTCC	124.107	99.8184	33.0095	Score: 0.8	PGSC0003DMT400025438	PGSC0003DMG402009818	RGC1	R gene
stu-miR482e-3p	TCTTGCCAATACCGCCCATTCC	124.107	99.8184	33.0095	Score: 0.8	PGSC0003DMT400025439	PGSC0003DMG402009818	RGC1	R gene
stu-miR482e-3p	TCTTGCCAATACCGCCCATTCC	124.107	99.8184	33.0095	Score: 0.8	PGSC0003DMT400058647	PGSC0003DMG400022785	Resistance protein PSH-RGH6	R gene
stu-miR482e-3p	TCTTGCCAATACCGCCCATTCC	124.107	99.8184	33.0095	Score: 1.8	PGSC0003DMT400061830	PGSC0003DMG400024055	Nematode resistance	R gene
stu-miR482e-3p	TCTTGCCAATACCGCCCATTCC	124.107	99.8184	33.0095	Score: 1.8	PGSC0003DMT400061831	PGSC0003DMG400024055	Nematode resistance	R gene
stu-miR482e-3p	TCTTGCCAATACCGCCCATTCC	124.107	99.8184	33.0095	Score: 1.5	PGSC0003DMT400062766	PGSC0003DMG400024430	Disease resistance protein BS2	R gene
stu-miR482e-3p	TCTTGCCAATACCGCCCATTCC	124.107	99.8184	33.0095	Score: 1.5	PGSC0003DMT400070503	PGSC0003DMG400027407	Plant disease resistant protein	R gene
stu-miR482e-3p	TCTTGCCAATACCGCCCATTCC	124.107	99.8184	33.0095	Score: 1.8	PGSC0003DMT400095266	PGSC0003DMG400044837	Nematode resistance	R gene
stu-miR530	TCTGCATTTGCACCTGCACCT	1.4198	0.241691	0	Score: 2.5	PGSC0003DMT400050478	PGSC0003DMG400019613	Polypyrimidine tract binding protein	other
stu-miR530	TCTGCATTTGCACCTGCACCT	1.4198	0.241691	0	Score: 2.5	PGSC0003DMT400050479	PGSC0003DMG400019613	Polypyrimidine tract binding protein	other
stu-miR530	TCTGCATTTGCACCTGCACCT	1.4198	0.241691	0	Score: 2.5	PGSC0003DMT400019998	PGSC0003DMG400007740	EPIDERMAL PATTERNING FACTOR 9	growth
stu-miR530	TCTGCATTTGCACCTGCACCT	1.4198	0.241691	0	Score: 2.5	PGSC0003DMT400025984	PGSC0003DMG400010027	Zinc finger protein	Transcription factor
stu-miR530	TCTGCATTTGCACCTGCACCT	1.4198	0.241691	0	Score: 2.5	PGSC0003DMT400075987	PGSC0003DMG400029556	Leucine-rich repeat transmembrane protein kinase	kinase
stu-miR530	TCTGCATTTGCACCTGCACCT	1.4198	0.241691	0	Score: 2.5	PGSC0003DMT400086240	PGSC0003DMG400035811	Gene of unknown function	unknown
stu-miR530	TCTGCATTTGCACCTGCACCT	1.4198	0.241691	0	Score: 2.5	PGSC0003DMT400089244	PGSC0003DMG400038815	Gene of unknown function	unknown
stu-miR530	TCTGCATTTGCACCTGCACCT	1.4198	0.241691	0	Score: 2.5	PGSC0003DMT400092878	PGSC0003DMG400042449	Gene of unknown function	unknown
stu-miR530	TCTGCATTTGCACCTGCACCT	1.4198	0.241691	0	Score: 2.5	PGSC0003DMT400094133	PGSC0003DMG400043704	Gene of unknown function	unknown
stu-miR530	TCTGCATTTGCACCTGCACCT	1.4198	0.241691	0	Score: 2.5	PGSC0003DMT400073696	PGSC0003DMG400028628	Conserved gene of unknown function	unknown
stu-miR530	TCTGCATTTGCACCTGCACCT	1.4198	0.241691	0	Score: 2.2	PGSC0003DMT400005374	PGSC0003DMG400002097	Transposon MuDR mudrA	other
stu-miR530	TCTGCATTTGCACCTGCACCT	1.4198	0.241691	0	Score: 2.2	PGSC0003DMT400005374	PGSC0003DMG400002097	Transposon MuDR mudrA	other
stu-miR530	TCTGCATTTGCACCTGCACCT	1.4198	0.241691	0	Score: 1.8	PGSC0003DMT400002881	PGSC0003DMG400001126	Zinc knuckle (CCHC-type) family protein	Transcription factor
stu-miR530	TCTGCATTTGCACCTGCACCT	1.4198	0.241691	0	Score: 1.8	PGSC0003DMT400002882	PGSC0003DMG400001126	Zinc knuckle (CCHC-type) family protein	Transcription factor
stu-miR530	TCTGCATTTGCACCTGCACCT	1.4198	0.241691	0	Score: 1.8	PGSC0003DMT400002883	PGSC0003DMG400001126	Zinc knuckle (CCHC-type) family protein	Transcription factor
stu-miR530	TCTGCATTTGCACCTGCACCT	1.4198	0.241691	0	Score: 1.8	PGSC0003DMT400002884	PGSC0003DMG400001126	Zinc knuckle (CCHC-type) family protein	Transcription factor
stu-miR530	TCTGCATTTGCACCTGCACCT	1.4198	0.241691	0	Score: 1.8	PGSC0003DMT400002885	PGSC0003DMG400001126	Zinc knuckle (CCHC-type) family protein	Transcription factor
stu-miR530	TCTGCATTTGCACCTGCACCT	1.4198	0.241691	0	Score: 1.2	PGSC0003DMT400065500	PGSC0003DMG400025479	PHAP2A protein	Transcription factor
stu-miR530	TCTGCATTTGCACCTGCACCT	1.4198	0.241691	0	Score: 1.2	PGSC0003DMT400065501	PGSC0003DMG400025479	PHAP2A protein	Transcription factor
stu-miR530	TCTGCATTTGCACCTGCACCT	1.4198	0.241691	0	Score: 1.2	PGSC0003DMT400065503	PGSC0003DMG400025479	PHAP2A protein	Transcription factor
stu-miR6024-3p	TTTTAGCAAGAGTTGTTTTCCC	48.6908	22.2356	10.2554	Score: 2.5	PGSC0003DMT400076528	PGSC0003DMG400029753	GTP-binding nuclear protein Ran2	other
stu-miR6024-3p	TTTTAGCAAGAGTTGTTTTCCC	48.6908	22.2356	10.2554	Score: 2.5	PGSC0003DMT400002131	PGSC0003DMG400000815	NBS-coding resistance gene analog	NBS-LRR protein
stu-miR6024-3p	TTTTAGCAAGAGTTGTTTTCCC	48.6908	22.2356	10.2554	Score: 2.5	PGSC0003DMT400002788	PGSC0003DMG400001081	NBS-LRR protein	NBS-LRR protein
stu-miR6024-3p	TTTTAGCAAGAGTTGTTTTCCC	48.6908	22.2356	10.2554	Score: 2.5	PGSC0003DMT400005006	PGSC0003DMG402001979	Disease resistance protein BS2	R gene
stu-miR6024-3p	TTTTAGCAAGAGTTGTTTTCCC	48.6908	22.2356	10.2554	Score: 2.5	PGSC0003DMT400005012	PGSC0003DMG400001982	NBS-coding resistance gene analog	NBS-LRR protein
stu-miR6024-3p	TTTTAGCAAGAGTTGTTTTCCC	48.6908	22.2356	10.2554	Score: 2.5	PGSC0003DMT400005013	PGSC0003DMG400001983	Disease resistance protein BS2	R gene
stu-miR6024-3p	TTTTAGCAAGAGTTGTTTTCCC	48.6908	22.2356	10.2554	Score: 2.5	PGSC0003DMT400005017	PGSC0003DMG401001984	Disease resistance protein BS2	R gene
stu-miR6024-3p	TTTTAGCAAGAGTTGTTTTCCC	48.6908	22.2356	10.2554	Score: 2.5	PGSC0003DMT400005032	PGSC0003DMG400001989	PRF	growth
stu-miR6024-3p	TTTTAGCAAGAGTTGTTTTCCC	48.6908	22.2356	10.2554	Score: 2.5	PGSC0003DMT400005037	PGSC0003DMG400001990	NBS-coding resistance gene analog	NBS-LRR protein
stu-miR6024-3p	TTTTAGCAAGAGTTGTTTTCCC	48.6908	22.2356	10.2554	Score: 2.5	PGSC0003DMT400005046	PGSC0003DMG400001994	NBS-LRR protein	NBS-LRR protein
stu-miR6024-3p	TTTTAGCAAGAGTTGTTTTCCC	48.6908	22.2356	10.2554	Score: 2.5	PGSC0003DMT400005052	PGSC0003DMG400001996	Resistance protein PSH-RGH6	R gene
stu-miR6024-3p	TTTTAGCAAGAGTTGTTTTCCC	48.6908	22.2356	10.2554	Score: 2.5	PGSC0003DMT400005732	PGSC0003DMG401002242	Disease resistance protein BS2	R gene
stu-miR6024-3p	TTTTAGCAAGAGTTGTTTTCCC	48.6908	22.2356	10.2554	Score: 2.5	PGSC0003DMT400006475	PGSC0003DMG400002526	LysM type receptor kinase	kinase
stu-miR6024-3p	TTTTAGCAAGAGTTGTTTTCCC	48.6908	22.2356	10.2554	Score: 2.5	PGSC0003DMT400009064	PGSC0003DMG400003527	Disease resistance protein RGA2	R gene
stu-miR6024-3p	TTTTAGCAAGAGTTGTTTTCCC	48.6908	22.2356	10.2554	Score: 2.5	PGSC0003DMT400009065	PGSC0003DMG400003527	Disease resistance protein RGA2	R gene
stu-miR6024-3p	TTTTAGCAAGAGTTGTTTTCCC	48.6908	22.2356	10.2554	Score: 2.5	PGSC0003DMT400011295	PGSC0003DMG401004423	Cc-nbs-lrr resistance protein	NBS-LRR protein
stu-miR6024-3p	TTTTAGCAAGAGTTGTTTTCCC	48.6908	22.2356	10.2554	Score: 2.5	PGSC0003DMT400011296	PGSC0003DMG401004423	Cc-nbs-lrr resistance protein	NBS-LRR protein
stu-miR6024-3p	TTTTAGCAAGAGTTGTTTTCCC	48.6908	22.2356	10.2554	Score: 2.5	PGSC0003DMT400011297	PGSC0003DMG401004423	Cc-nbs-lrr resistance protein	NBS-LRR protein
stu-miR6024-3p	TTTTAGCAAGAGTTGTTTTCCC	48.6908	22.2356	10.2554	Score: 2.5	PGSC0003DMT400011298	PGSC0003DMG401004423	Cc-nbs-lrr resistance protein	NBS-LRR protein
stu-miR6024-3p	TTTTAGCAAGAGTTGTTTTCCC	48.6908	22.2356	10.2554	Score: 2.5	PGSC0003DMT400011301	PGSC0003DMG401004423	Cc-nbs-lrr resistance protein	NBS-LRR protein
stu-miR6024-3p	TTTTAGCAAGAGTTGTTTTCCC	48.6908	22.2356	10.2554	Score: 2.5	PGSC0003DMT400019678	PGSC0003DMG400007605	NBS-LRR protein	NBS-LRR protein
stu-miR6024-3p	TTTTAGCAAGAGTTGTTTTCCC	48.6908	22.2356	10.2554	Score: 2.5	PGSC0003DMT400020342	PGSC0003DMG400007867	Disease resistance protein Gpa2	R gene
stu-miR6024-3p	TTTTAGCAAGAGTTGTTTTCCC	48.6908	22.2356	10.2554	Score: 2.5	PGSC0003DMT400020353	PGSC0003DMG402007871	Disease resistance protein Gpa2	R gene
stu-miR6024-3p	TTTTAGCAAGAGTTGTTTTCCC	48.6908	22.2356	10.2554	Score: 2.5	PGSC0003DMT400020354	PGSC0003DMG402007871	Disease resistance protein Gpa2	R gene
stu-miR6024-3p	TTTTAGCAAGAGTTGTTTTCCC	48.6908	22.2356	10.2554	Score: 2.5	PGSC0003DMT400021606	PGSC0003DMG401008383	Leucine-rich repeat containing protein	NBS-LRR protein
stu-miR6024-3p	TTTTAGCAAGAGTTGTTTTCCC	48.6908	22.2356	10.2554	Score: 2.5	PGSC0003DMT400021608	PGSC0003DMG402008383	NBS-LRR resistance protein	NBS-LRR protein
stu-miR6024-3p	TTTTAGCAAGAGTTGTTTTCCC	48.6908	22.2356	10.2554	Score: 2.5	PGSC0003DMT400021632	PGSC0003DMG400008394	Cc-nbs-lrr resistance protein	NBS-LRR protein
stu-miR6024-3p	TTTTAGCAAGAGTTGTTTTCCC	48.6908	22.2356	10.2554	Score: 2.5	PGSC0003DMT400021633	PGSC0003DMG400008394	Cc-nbs-lrr resistance protein	NBS-LRR protein
stu-miR6024-3p	TTTTAGCAAGAGTTGTTTTCCC	48.6908	22.2356	10.2554	Score: 2.5	PGSC0003DMT400021634	PGSC0003DMG400008394	Cc-nbs-lrr resistance protein	NBS-LRR protein
stu-miR6024-3p	TTTTAGCAAGAGTTGTTTTCCC	48.6908	22.2356	10.2554	Score: 2.5	PGSC0003DMT400021635	PGSC0003DMG400008394	Cc-nbs-lrr resistance protein	NBS-LRR protein
stu-miR6024-3p	TTTTAGCAAGAGTTGTTTTCCC	48.6908	22.2356	10.2554	Score: 2.5	PGSC0003DMT400021636	PGSC0003DMG400008394	Cc-nbs-lrr resistance protein	NBS-LRR protein
stu-miR6024-3p	TTTTAGCAAGAGTTGTTTTCCC	48.6908	22.2356	10.2554	Score: 2.5	PGSC0003DMT400021637	PGSC0003DMG400008394	Cc-nbs-lrr resistance protein	NBS-LRR protein
stu-miR6024-3p	TTTTAGCAAGAGTTGTTTTCCC	48.6908	22.2356	10.2554	Score: 2.5	PGSC0003DMT400022153	PGSC0003DMG400008595	Cc-nbs-lrr resistance protein	NBS-LRR protein
stu-miR6024-3p	TTTTAGCAAGAGTTGTTTTCCC	48.6908	22.2356	10.2554	Score: 2.5	PGSC0003DMT400022154	PGSC0003DMG400008595	Cc-nbs-lrr resistance protein	NBS-LRR protein
stu-miR6024-3p	TTTTAGCAAGAGTTGTTTTCCC	48.6908	22.2356	10.2554	Score: 2.5	PGSC0003DMT400022155	PGSC0003DMG400008595	Cc-nbs-lrr resistance protein	NBS-LRR protein
stu-miR6024-3p	TTTTAGCAAGAGTTGTTTTCCC	48.6908	22.2356	10.2554	Score: 2.5	PGSC0003DMT400028417	PGSC0003DMG400010944	Cc-nbs-lrr resistance protein	NBS-LRR protein
stu-miR6024-3p	TTTTAGCAAGAGTTGTTTTCCC	48.6908	22.2356	10.2554	Score: 2.5	PGSC0003DMT400028691	PGSC0003DMG400011045	Cc-nbs-lrr resistance protein	NBS-LRR protein
stu-miR6024-3p	TTTTAGCAAGAGTTGTTTTCCC	48.6908	22.2356	10.2554	Score: 2.5	PGSC0003DMT400028882	PGSC0003DMG400011115	Cc-nbs-lrr resistance protein	NBS-LRR protein
stu-miR6024-3p	TTTTAGCAAGAGTTGTTTTCCC	48.6908	22.2356	10.2554	Score: 2.5	PGSC0003DMT400041040	PGSC0003DMG401015877	NBS-LRR protein	NBS-LRR protein
stu-miR6024-3p	TTTTAGCAAGAGTTGTTTTCCC	48.6908	22.2356	10.2554	Score: 2.5	PGSC0003DMT400041043	PGSC0003DMG401015877	NBS-LRR protein	NBS-LRR protein
stu-miR6024-3p	TTTTAGCAAGAGTTGTTTTCCC	48.6908	22.2356	10.2554	Score: 2.5	PGSC0003DMT400041044	PGSC0003DMG402015877	NBS-coding resistance gene analog	NBS-LRR protein
stu-miR6024-3p	TTTTAGCAAGAGTTGTTTTCCC	48.6908	22.2356	10.2554	Score: 2.5	PGSC0003DMT400044045	PGSC0003DMG402017089	NBS-coding resistance gene analog	NBS-LRR protein
stu-miR6024-3p	TTTTAGCAAGAGTTGTTTTCCC	48.6908	22.2356	10.2554	Score: 2.5	PGSC0003DMT400047907	PGSC0003DMG400018619	Tospovirus resistance protein B	R gene
stu-miR6024-3p	TTTTAGCAAGAGTTGTTTTCCC	48.6908	22.2356	10.2554	Score: 2.5	PGSC0003DMT400049984	PGSC0003DMG400019418	Cc-nbs-lrr resistance protein	NBS-LRR protein
stu-miR6024-3p	TTTTAGCAAGAGTTGTTTTCCC	48.6908	22.2356	10.2554	Score: 2.5	PGSC0003DMT400049985	PGSC0003DMG400019418	Cc-nbs-lrr resistance protein	NBS-LRR protein
stu-miR6024-3p	TTTTAGCAAGAGTTGTTTTCCC	48.6908	22.2356	10.2554	Score: 2.5	PGSC0003DMT400050509	PGSC0003DMG400019627	Disease resistance protein Gpa2	R gene
stu-miR6024-3p	TTTTAGCAAGAGTTGTTTTCCC	48.6908	22.2356	10.2554	Score: 2.5	PGSC0003DMT400050510	PGSC0003DMG400019627	Disease resistance protein Gpa2	R gene
stu-miR6024-3p	TTTTAGCAAGAGTTGTTTTCCC	48.6908	22.2356	10.2554	Score: 2.5	PGSC0003DMT400050805	PGSC0003DMG400019732	Disease resistance protein	R gene
stu-miR6024-3p	TTTTAGCAAGAGTTGTTTTCCC	48.6908	22.2356	10.2554	Score: 2.5	PGSC0003DMT400050806	PGSC0003DMG400019732	Disease resistance protein	R gene
stu-miR6024-3p	TTTTAGCAAGAGTTGTTTTCCC	48.6908	22.2356	10.2554	Score: 2.5	PGSC0003DMT400053809	PGSC0003DMG402020874	Tospovirus resistance protein E	R gene
stu-miR6024-3p	TTTTAGCAAGAGTTGTTTTCCC	48.6908	22.2356	10.2554	Score: 2.5	PGSC0003DMT400056264	PGSC0003DMG400021861	NRC1	NBS-LRR protein
stu-miR6024-3p	TTTTAGCAAGAGTTGTTTTCCC	48.6908	22.2356	10.2554	Score: 2.5	PGSC0003DMT400056265	PGSC0003DMG400021861	NRC1	NBS-LRR protein
stu-miR6024-3p	TTTTAGCAAGAGTTGTTTTCCC	48.6908	22.2356	10.2554	Score: 2.5	PGSC0003DMT400062762	PGSC0003DMG400024429	NBS-coding resistance gene analog	NBS-LRR protein
stu-miR6024-3p	TTTTAGCAAGAGTTGTTTTCCC	48.6908	22.2356	10.2554	Score: 2.5	PGSC0003DMT400062763	PGSC0003DMG400024429	NBS-coding resistance gene analog	NBS-LRR protein
stu-miR6024-3p	TTTTAGCAAGAGTTGTTTTCCC	48.6908	22.2356	10.2554	Score: 2.5	PGSC0003DMT400062764	PGSC0003DMG400024429	NBS-coding resistance gene analog	NBS-LRR protein
stu-miR6024-3p	TTTTAGCAAGAGTTGTTTTCCC	48.6908	22.2356	10.2554	Score: 2.5	PGSC0003DMT400062765	PGSC0003DMG400024429	NBS-coding resistance gene analog	NBS-LRR protein
stu-miR6024-3p	TTTTAGCAAGAGTTGTTTTCCC	48.6908	22.2356	10.2554	Score: 2.5	PGSC0003DMT400068569	PGSC0003DMG400026666	Cc-nbs-lrr resistance protein	NBS-LRR protein
stu-miR6024-3p	TTTTAGCAAGAGTTGTTTTCCC	48.6908	22.2356	10.2554	Score: 2.5	PGSC0003DMT400068570	PGSC0003DMG400026666	Cc-nbs-lrr resistance protein	NBS-LRR protein
stu-miR6024-3p	TTTTAGCAAGAGTTGTTTTCCC	48.6908	22.2356	10.2554	Score: 2.5	PGSC0003DMT400070399	PGSC0003DMG401027371	CC-NBS-LRR protein	NBS-LRR protein
stu-miR6024-3p	TTTTAGCAAGAGTTGTTTTCCC	48.6908	22.2356	10.2554	Score: 2.5	PGSC0003DMT400071965	PGSC0003DMG400028001	Cc-nbs-lrr resistance protein	NBS-LRR protein
stu-miR6024-3p	TTTTAGCAAGAGTTGTTTTCCC	48.6908	22.2356	10.2554	Score: 2.5	PGSC0003DMT400071966	PGSC0003DMG400028001	Cc-nbs-lrr resistance protein	NBS-LRR protein
stu-miR6024-3p	TTTTAGCAAGAGTTGTTTTCCC	48.6908	22.2356	10.2554	Score: 2.5	PGSC0003DMT400071967	PGSC0003DMG400028001	Cc-nbs-lrr resistance protein	NBS-LRR protein
stu-miR6024-3p	TTTTAGCAAGAGTTGTTTTCCC	48.6908	22.2356	10.2554	Score: 2.5	PGSC0003DMT400080929	PGSC0003DMG400031521	Tospovirus resistance protein B	R gene
stu-miR6024-3p	TTTTAGCAAGAGTTGTTTTCCC	48.6908	22.2356	10.2554	Score: 2.5	PGSC0003DMT400080930	PGSC0003DMG400031521	Tospovirus resistance protein B	R gene
stu-miR6024-3p	TTTTAGCAAGAGTTGTTTTCCC	48.6908	22.2356	10.2554	Score: 2.5	PGSC0003DMT400082452	PGSC0003DMG402032547	HJTR2GH1 protein	NBS-LRR protein
stu-miR6024-3p	TTTTAGCAAGAGTTGTTTTCCC	48.6908	22.2356	10.2554	Score: 2.5	PGSC0003DMT400082499	PGSC0003DMG400032576	Rpi protein	R gene
stu-miR6024-3p	TTTTAGCAAGAGTTGTTTTCCC	48.6908	22.2356	10.2554	Score: 2.5	PGSC0003DMT400082501	PGSC0003DMG400032578	HJTR2GH1 protein	NBS-LRR protein
stu-miR6024-3p	TTTTAGCAAGAGTTGTTTTCCC	48.6908	22.2356	10.2554	Score: 2.0	PGSC0003DMT400002127	PGSC0003DMG400000813	NBS-LRR resistance protein	NBS-LRR protein
stu-miR6024-3p	TTTTAGCAAGAGTTGTTTTCCC	48.6908	22.2356	10.2554	Score: 2.0	PGSC0003DMT400002128	PGSC0003DMG400000813	NBS-LRR resistance protein	NBS-LRR protein
stu-miR6024-3p	TTTTAGCAAGAGTTGTTTTCCC	48.6908	22.2356	10.2554	Score: 2.0	PGSC0003DMT400028394	PGSC0003DMG401010943	NBS-LRR resistance protein	NBS-LRR protein
stu-miR6024-3p	TTTTAGCAAGAGTTGTTTTCCC	48.6908	22.2356	10.2554	Score: 2.0	PGSC0003DMT400032412	PGSC0003DMG400012450	ATP binding protein	other
stu-miR6024-3p	TTTTAGCAAGAGTTGTTTTCCC	48.6908	22.2356	10.2554	Score: 2.0	PGSC0003DMT400032413	PGSC0003DMG400012450	ATP binding protein	other
stu-miR6024-3p	TTTTAGCAAGAGTTGTTTTCCC	48.6908	22.2356	10.2554	Score: 2.0	PGSC0003DMT400002132	PGSC0003DMG400000816	Tospovirus resistance protein A	R gene
stu-miR6024-3p	TTTTAGCAAGAGTTGTTTTCCC	48.6908	22.2356	10.2554	Score: 2.0	PGSC0003DMT400002133	PGSC0003DMG400000816	Tospovirus resistance protein A	R gene
stu-miR6024-3p	TTTTAGCAAGAGTTGTTTTCCC	48.6908	22.2356	10.2554	Score: 2.0	PGSC0003DMT400002134	PGSC0003DMG400000816	Tospovirus resistance protein A	R gene
stu-miR6024-3p	TTTTAGCAAGAGTTGTTTTCCC	48.6908	22.2356	10.2554	Score: 2.0	PGSC0003DMT400011272	PGSC0003DMG400004413	Tm-2 protein	R gene
stu-miR6024-3p	TTTTAGCAAGAGTTGTTTTCCC	48.6908	22.2356	10.2554	Score: 2.0	PGSC0003DMT400012486	PGSC0003DMG400004874	Resistance protein PSH-RGH7	R gene
stu-miR6024-3p	TTTTAGCAAGAGTTGTTTTCCC	48.6908	22.2356	10.2554	Score: 2.0	PGSC0003DMT400029093	PGSC0003DMG400011193	Tospovirus resistance protein C	R gene
stu-miR6024-3p	TTTTAGCAAGAGTTGTTTTCCC	48.6908	22.2356	10.2554	Score: 2.0	PGSC0003DMT400031076	PGSC0003DMG400011906	Tospovirus resistance protein D	R gene
stu-miR6024-3p	TTTTAGCAAGAGTTGTTTTCCC	48.6908	22.2356	10.2554	Score: 2.0	PGSC0003DMT400036070	PGSC0003DMG400013891	Resistance protein PSH-RGH6	R gene
stu-miR6024-3p	TTTTAGCAAGAGTTGTTTTCCC	48.6908	22.2356	10.2554	Score: 2.0	PGSC0003DMT400053053	PGSC0003DMG400020584	Rpi-vnt1	R gene
stu-miR6024-3p	TTTTAGCAAGAGTTGTTTTCCC	48.6908	22.2356	10.2554	Score: 2.0	PGSC0003DMT400053056	PGSC0003DMG401020585	Rpi-vnt1	R gene
stu-miR6024-3p	TTTTAGCAAGAGTTGTTTTCCC	48.6908	22.2356	10.2554	Score: 2.0	PGSC0003DMT400053057	PGSC0003DMG402020585	Rpi-vnt1	R gene
stu-miR6024-3p	TTTTAGCAAGAGTTGTTTTCCC	48.6908	22.2356	10.2554	Score: 2.0	PGSC0003DMT400053065	PGSC0003DMG400020586	Late blight resistance protein	R gene
stu-miR6024-3p	TTTTAGCAAGAGTTGTTTTCCC	48.6908	22.2356	10.2554	Score: 2.0	PGSC0003DMT400053067	PGSC0003DMG400020587	Rpi-vnt1	R gene
stu-miR6024-3p	TTTTAGCAAGAGTTGTTTTCCC	48.6908	22.2356	10.2554	Score: 2.0	PGSC0003DMT400053069	PGSC0003DMG400020587	Rpi-vnt1	R gene
stu-miR6024-3p	TTTTAGCAAGAGTTGTTTTCCC	48.6908	22.2356	10.2554	Score: 2.0	PGSC0003DMT400054534	PGSC0003DMG400021169	Disease resistance protein	R gene
stu-miR6024-3p	TTTTAGCAAGAGTTGTTTTCCC	48.6908	22.2356	10.2554	Score: 2.0	PGSC0003DMT400056266	PGSC0003DMG400021862	Disease resistance protein	R gene
stu-miR6024-3p	TTTTAGCAAGAGTTGTTTTCCC	48.6908	22.2356	10.2554	Score: 2.0	PGSC0003DMT400062608	PGSC0003DMG400024363	Rpi-vnt1	R gene
stu-miR6024-3p	TTTTAGCAAGAGTTGTTTTCCC	48.6908	22.2356	10.2554	Score: 2.0	PGSC0003DMT400062609	PGSC0003DMG400024363	Rpi-vnt1	R gene
stu-miR6024-3p	TTTTAGCAAGAGTTGTTTTCCC	48.6908	22.2356	10.2554	Score: 2.0	PGSC0003DMT400062611	PGSC0003DMG400024365	Rpi-vnt1	R gene
stu-miR6024-3p	TTTTAGCAAGAGTTGTTTTCCC	48.6908	22.2356	10.2554	Score: 2.0	PGSC0003DMT400062766	PGSC0003DMG400024430	Disease resistance protein BS2	R gene
stu-miR6024-3p	TTTTAGCAAGAGTTGTTTTCCC	48.6908	22.2356	10.2554	Score: 2.2	PGSC0003DMT400007707	PGSC0003DMG400002980	Disease resistance protein R3a	R gene
stu-miR6024-3p	TTTTAGCAAGAGTTGTTTTCCC	48.6908	22.2356	10.2554	Score: 2.2	PGSC0003DMT400018940	PGSC0003DMG400007344	Disease resistance protein R3a	R gene
stu-miR6024-3p	TTTTAGCAAGAGTTGTTTTCCC	48.6908	22.2356	10.2554	Score: 2.2	PGSC0003DMT400020003	PGSC0003DMG400007742	NBS-coding resistance gene protein	NBS-LRR protein
stu-miR6024-3p	TTTTAGCAAGAGTTGTTTTCCC	48.6908	22.2356	10.2554	Score: 2.2	PGSC0003DMT400031598	PGSC0003DMG400012123	ATPase family AAA domain-containing protein 1	other
stu-miR6024-3p	TTTTAGCAAGAGTTGTTTTCCC	48.6908	22.2356	10.2554	Score: 2.2	PGSC0003DMT400044611	PGSC0003DMG400017317	Nematode resistance	R gene
stu-miR6024-3p	TTTTAGCAAGAGTTGTTTTCCC	48.6908	22.2356	10.2554	Score: 2.2	PGSC0003DMT400045553	PGSC0003DMG400017666	Disease resistance protein I2C-5	R gene
stu-miR6024-3p	TTTTAGCAAGAGTTGTTTTCCC	48.6908	22.2356	10.2554	Score: 2.2	PGSC0003DMT400047774	PGSC0003DMG400018572	Disease resistance protein I2C-5	R gene
stu-miR6024-3p	TTTTAGCAAGAGTTGTTTTCCC	48.6908	22.2356	10.2554	Score: 2.2	PGSC0003DMT400047788	PGSC0003DMG402018576	Potato late blight resistance protein R3a	R gene
stu-miR6024-3p	TTTTAGCAAGAGTTGTTTTCCC	48.6908	22.2356	10.2554	Score: 2.2	PGSC0003DMT400048109	PGSC0003DMG400018693	Disease resistance protein I2	R gene
stu-miR6024-3p	TTTTAGCAAGAGTTGTTTTCCC	48.6908	22.2356	10.2554	Score: 2.2	PGSC0003DMT400048109	PGSC0003DMG400018693	Disease resistance protein I2	R gene
stu-miR6024-3p	TTTTAGCAAGAGTTGTTTTCCC	48.6908	22.2356	10.2554	Score: 2.2	PGSC0003DMT400058213	PGSC0003DMG401022603	ATP binding / protein binding / transmembrane receptor	other
stu-miR6024-3p	TTTTAGCAAGAGTTGTTTTCCC	48.6908	22.2356	10.2554	Score: 2.2	PGSC0003DMT400070480	PGSC0003DMG401027402	Disease resistance protein R3a	R gene
stu-miR6024-3p	TTTTAGCAAGAGTTGTTTTCCC	48.6908	22.2356	10.2554	Score: 2.2	PGSC0003DMT400070482	PGSC0003DMG402027402	Disease resistance protein R3a	R gene
stu-miR6024-3p	TTTTAGCAAGAGTTGTTTTCCC	48.6908	22.2356	10.2554	Score: 2.2	PGSC0003DMT400070503	PGSC0003DMG400027407	Plant disease resistant protein	R gene
stu-miR6024-3p	TTTTAGCAAGAGTTGTTTTCCC	48.6908	22.2356	10.2554	Score: 2.2	PGSC0003DMT400077717	PGSC0003DMG402030235	Disease resistance protein R3a	R gene
stu-miR6024-3p	TTTTAGCAAGAGTTGTTTTCCC	48.6908	22.2356	10.2554	Score: 2.2	PGSC0003DMT400077718	PGSC0003DMG401030236	CC-NBS-LRR protein	NBS-LRR protein
stu-miR6024-3p	TTTTAGCAAGAGTTGTTTTCCC	48.6908	22.2356	10.2554	Score: 2.2	PGSC0003DMT400077719	PGSC0003DMG401030236	CC-NBS-LRR protein	NBS-LRR protein
stu-miR6024-3p	TTTTAGCAAGAGTTGTTTTCCC	48.6908	22.2356	10.2554	Score: 2.2	PGSC0003DMT400077720	PGSC0003DMG401030236	CC-NBS-LRR protein	NBS-LRR protein
stu-miR6024-3p	TTTTAGCAAGAGTTGTTTTCCC	48.6908	22.2356	10.2554	Score: 2.2	PGSC0003DMT400077727	PGSC0003DMG400030238	CC-NBS-LRR protein	NBS-LRR protein
stu-miR6024-3p	TTTTAGCAAGAGTTGTTTTCCC	48.6908	22.2356	10.2554	Score: 2.2	PGSC0003DMT400077735	PGSC0003DMG400030239	CC-NBS-LRR protein	NBS-LRR protein
stu-miR6024-3p	TTTTAGCAAGAGTTGTTTTCCC	48.6908	22.2356	10.2554	Score: 1.5	PGSC0003DMT400005011	PGSC0003DMG400001981	NBS-LRR protein	NBS-LRR protein
stu-miR6024-3p	TTTTAGCAAGAGTTGTTTTCCC	48.6908	22.2356	10.2554	Score: 1.8	PGSC0003DMT400053954	PGSC0003DMG400020935	Tir-nbs-lrr resistance protein	NBS-LRR protein
stu-miR6024-3p	TTTTAGCAAGAGTTGTTTTCCC	48.6908	22.2356	10.2554	Score: 1.5	PGSC0003DMT400056268	PGSC0003DMG400021863	Nucleotide binding site-leucine rich repeat protein	NBS-LRR protein
stu-miR6024-3p	TTTTAGCAAGAGTTGTTTTCCC	48.6908	22.2356	10.2554	Score: 1.8	PGSC0003DMT400067963	PGSC0003DMG402026432	NBS-coding resistance gene protein	NBS-LRR protein
stu-miR6024-3p	TTTTAGCAAGAGTTGTTTTCCC	48.6908	22.2356	10.2554	Score: 1.5	PGSC0003DMT400051269	PGSC0003DMG400019913	Tm-2	R gene
stu-miR6024-3p	TTTTAGCAAGAGTTGTTTTCCC	48.6908	22.2356	10.2554	Score: 1.5	PGSC0003DMT400051270	PGSC0003DMG400019913	Tm-2	R gene
stu-miR6024-3p	TTTTAGCAAGAGTTGTTTTCCC	48.6908	22.2356	10.2554	Score: 1.5	PGSC0003DMT400062180	PGSC0003DMG400024202	Disease resistance protein BS2	R gene
stu-miR6024-3p	TTTTAGCAAGAGTTGTTTTCCC	48.6908	22.2356	10.2554	Score: 1.5	PGSC0003DMT400078333	PGSC0003DMG400030497	Resistance protein PSH-RGH6	R gene
stu-miR6024-3p	TTTTAGCAAGAGTTGTTTTCCC	48.6908	22.2356	10.2554	Score: 1.5	PGSC0003DMT400078334	PGSC0003DMG400030498	Disease resistance protein BS2	R gene
stu-miR6025	TACCAACAATTGAGATAACATC	16.7035	8.62031	4.16625	Score: 2.5	PGSC0003DMT400002127	PGSC0003DMG400000813	NBS-LRR resistance protein	NBS-LRR protein
stu-miR6025	TACCAACAATTGAGATAACATC	16.7035	8.62031	4.16625	Score: 2.5	PGSC0003DMT400002128	PGSC0003DMG400000813	NBS-LRR resistance protein	NBS-LRR protein
stu-miR6025	TACCAACAATTGAGATAACATC	16.7035	8.62031	4.16625	Score: 2.5	PGSC0003DMT400021403	PGSC0003DMG400008306	NBS-LRR resistance protein	NBS-LRR protein
stu-miR6025	TACCAACAATTGAGATAACATC	16.7035	8.62031	4.16625	Score: 2.5	PGSC0003DMT400031076	PGSC0003DMG400011906	Tospovirus resistance protein D	R gene
stu-miR6025	TACCAACAATTGAGATAACATC	16.7035	8.62031	4.16625	Score: 2.5	PGSC0003DMT400031082	PGSC0003DMG400011907	NBS-coding resistance gene analog	NBS-LRR protein
stu-miR6025	TACCAACAATTGAGATAACATC	16.7035	8.62031	4.16625	Score: 2.5	PGSC0003DMT400035068	PGSC0003DMG400013486	Disease resistance protein	R gene
stu-miR6025	TACCAACAATTGAGATAACATC	16.7035	8.62031	4.16625	Score: 2.5	PGSC0003DMT400044169	PGSC0003DMG400017146	NBS-LRR resistance protein RGH1	NBS-LRR protein
stu-miR6025	TACCAACAATTGAGATAACATC	16.7035	8.62031	4.16625	Score: 2.5	PGSC0003DMT400044170	PGSC0003DMG400017146	NBS-LRR resistance protein RGH1	NBS-LRR protein
stu-miR6025	TACCAACAATTGAGATAACATC	16.7035	8.62031	4.16625	Score: 2.5	PGSC0003DMT400056268	PGSC0003DMG400021863	Nucleotide binding site-leucine rich repeat protein	NBS-LRR protein
stu-miR6025	TACCAACAATTGAGATAACATC	16.7035	8.62031	4.16625	Score: 2.5	PGSC0003DMT400029468	PGSC0003DMG400011332	Conserved gene of unknown function	unknown
stu-miR6025	TACCAACAATTGAGATAACATC	16.7035	8.62031	4.16625	Score: 2.0	PGSC0003DMT400024108	PGSC0003DMG401009323	Receptor protein kinase	kinase
stu-miR6025	TACCAACAATTGAGATAACATC	16.7035	8.62031	4.16625	Score: 2.0	PGSC0003DMT400024109	PGSC0003DMG402009323	Receptor protein kinase	kinase
stu-miR6025	TACCAACAATTGAGATAACATC	16.7035	8.62031	4.16625	Score: 2.0	PGSC0003DMT400024113	PGSC0003DMG401009323	Receptor protein kinase	kinase
stu-miR6025	TACCAACAATTGAGATAACATC	16.7035	8.62031	4.16625	Score: 2.0	PGSC0003DMT400024114	PGSC0003DMG401009323	Receptor protein kinase	kinase
stu-miR6025	TACCAACAATTGAGATAACATC	16.7035	8.62031	4.16625	Score: 2.0	PGSC0003DMT400024122	PGSC0003DMG401009323	Receptor protein kinase	kinase
stu-miR6025	TACCAACAATTGAGATAACATC	16.7035	8.62031	4.16625	Score: 2.0	PGSC0003DMT400007569	PGSC0003DMG400002920	RGC1	R gene
stu-miR6025	TACCAACAATTGAGATAACATC	16.7035	8.62031	4.16625	Score: 2.0	PGSC0003DMT400007570	PGSC0003DMG400002920	RGC1	R gene
stu-miR6025	TACCAACAATTGAGATAACATC	16.7035	8.62031	4.16625	Score: 2.0	PGSC0003DMT400036104	PGSC0003DMG400013904	Resistance protein PSH-RGH6	R gene
stu-miR6025	TACCAACAATTGAGATAACATC	16.7035	8.62031	4.16625	Score: 2.0	PGSC0003DMT400047452	PGSC0003DMG400018442	Late blight resistance protein	R gene
stu-miR6025	TACCAACAATTGAGATAACATC	16.7035	8.62031	4.16625	Score: 2.0	PGSC0003DMT400068337	PGSC0003DMG400026573	Resistance protein PSH-RGH6	R gene
stu-miR6025	TACCAACAATTGAGATAACATC	16.7035	8.62031	4.16625	Score: 2.0	PGSC0003DMT400080304	PGSC0003DMG400031265	Late blight resistance protein	R gene
stu-miR6025	TACCAACAATTGAGATAACATC	16.7035	8.62031	4.16625	Score: 2.2	PGSC0003DMT400054534	PGSC0003DMG400021169	Disease resistance protein	R gene
stu-miR6025	TACCAACAATTGAGATAACATC	16.7035	8.62031	4.16625	Score: 1.5	PGSC0003DMT400011649	PGSC0003DMG400004579	NBS-coding resistance gene analog	NBS-LRR protein
stu-miR6025	TACCAACAATTGAGATAACATC	16.7035	8.62031	4.16625	Score: 1.5	PGSC0003DMT400064587	PGSC0003DMG400025099	PRF	growth
stu-miR6025	TACCAACAATTGAGATAACATC	16.7035	8.62031	4.16625	Score: 1.5	PGSC0003DMT400064588	PGSC0003DMG400025099	PRF	growth
stu-miR6025	TACCAACAATTGAGATAACATC	16.7035	8.62031	4.16625	Score: 1.5	PGSC0003DMT400064589	PGSC0003DMG400025099	PRF	growth
stu-miR6025	TACCAACAATTGAGATAACATC	16.7035	8.62031	4.16625	Score: 1.5	PGSC0003DMT400011642	PGSC0003DMG402004578	Late blight resistance protein homolog R1B-16	R gene
stu-miR6025	TACCAACAATTGAGATAACATC	16.7035	8.62031	4.16625	Score: 1.5	PGSC0003DMT400011644	PGSC0003DMG402004578	Late blight resistance protein homolog R1B-16	R gene
stu-miR6025	TACCAACAATTGAGATAACATC	16.7035	8.62031	4.16625	Score: 1.5	PGSC0003DMT400035133	PGSC0003DMG400013506	Late blight resistance protein homolog R1B-16	R gene
stu-miR6025	TACCAACAATTGAGATAACATC	16.7035	8.62031	4.16625	Score: 1.5	PGSC0003DMT400035134	PGSC0003DMG400013506	Late blight resistance protein homolog R1B-16	R gene
stu-miR6025	TACCAACAATTGAGATAACATC	16.7035	8.62031	4.16625	Score: 1.5	PGSC0003DMT400047451	PGSC0003DMG400018441	Late blight resistance protein	R gene
stu-miR6025	TACCAACAATTGAGATAACATC	16.7035	8.62031	4.16625	Score: 1.5	PGSC0003DMT400059360	PGSC0003DMG400023062	Disease resistance protein	R gene
stu-miR6025	TACCAACAATTGAGATAACATC	16.7035	8.62031	4.16625	Score: 1.5	PGSC0003DMT400059361	PGSC0003DMG400023062	Disease resistance protein	R gene
stu-miR6026-3p	TTCTTGGCTAGAGTTGTATTGC	29.4817	20.4632	8.3325	Score: 2.5	PGSC0003DMT400015954	PGSC0003DMG400006243	OJ1116_C07.8 protein	other
stu-miR6026-3p	TTCTTGGCTAGAGTTGTATTGC	29.4817	20.4632	8.3325	Score: 2.5	PGSC0003DMT400015955	PGSC0003DMG400006243	OJ1116_C07.8 protein	other
stu-miR6026-3p	TTCTTGGCTAGAGTTGTATTGC	29.4817	20.4632	8.3325	Score: 2.5	PGSC0003DMT400013241	PGSC0003DMG400005173	Tospovirus resistance protein A	R gene
stu-miR6026-3p	TTCTTGGCTAGAGTTGTATTGC	29.4817	20.4632	8.3325	Score: 2.5	PGSC0003DMT400021403	PGSC0003DMG400008306	NBS-LRR resistance protein	NBS-LRR protein
stu-miR6026-3p	TTCTTGGCTAGAGTTGTATTGC	29.4817	20.4632	8.3325	Score: 2.5	PGSC0003DMT400031082	PGSC0003DMG400011907	NBS-coding resistance gene analog	NBS-LRR protein
stu-miR6026-3p	TTCTTGGCTAGAGTTGTATTGC	29.4817	20.4632	8.3325	Score: 2.5	PGSC0003DMT400062766	PGSC0003DMG400024430	Disease resistance protein BS2	R gene
stu-miR6026-3p	TTCTTGGCTAGAGTTGTATTGC	29.4817	20.4632	8.3325	Score: 2.5	PGSC0003DMT400067514	PGSC0003DMG400026252	Vesicle-associated membrane protein	cell wall and Membrane
stu-miR6026-3p	TTCTTGGCTAGAGTTGTATTGC	29.4817	20.4632	8.3325	Score: 2.5	PGSC0003DMT400067515	PGSC0003DMG400026252	Vesicle-associated membrane protein	cell wall and Membrane
stu-miR6026-3p	TTCTTGGCTAGAGTTGTATTGC	29.4817	20.4632	8.3325	Score: 2.5	PGSC0003DMT400072845	PGSC0003DMG400028339	Late blight resistance protein	R gene
stu-miR6026-3p	TTCTTGGCTAGAGTTGTATTGC	29.4817	20.4632	8.3325	Score: 2.5	PGSC0003DMT400072846	PGSC0003DMG400028339	Late blight resistance protein	R gene
stu-miR6026-3p	TTCTTGGCTAGAGTTGTATTGC	29.4817	20.4632	8.3325	Score: 2.0	PGSC0003DMT400018693	PGSC0003DMG400007241	Zinc finger protein	Transcription factor
stu-miR6026-3p	TTCTTGGCTAGAGTTGTATTGC	29.4817	20.4632	8.3325	Score: 2.0	PGSC0003DMT400011272	PGSC0003DMG400004413	Tm-2 protein	R gene
stu-miR6026-3p	TTCTTGGCTAGAGTTGTATTGC	29.4817	20.4632	8.3325	Score: 2.0	PGSC0003DMT400051269	PGSC0003DMG400019913	Tm-2	R gene
stu-miR6026-3p	TTCTTGGCTAGAGTTGTATTGC	29.4817	20.4632	8.3325	Score: 2.0	PGSC0003DMT400051270	PGSC0003DMG400019913	Tm-2	R gene
stu-miR6026-3p	TTCTTGGCTAGAGTTGTATTGC	29.4817	20.4632	8.3325	Score: 2.0	PGSC0003DMT400053053	PGSC0003DMG400020584	Rpi-vnt1	R gene
stu-miR6026-3p	TTCTTGGCTAGAGTTGTATTGC	29.4817	20.4632	8.3325	Score: 2.0	PGSC0003DMT400053056	PGSC0003DMG401020585	Rpi-vnt1	R gene
stu-miR6026-3p	TTCTTGGCTAGAGTTGTATTGC	29.4817	20.4632	8.3325	Score: 2.0	PGSC0003DMT400053057	PGSC0003DMG402020585	Rpi-vnt1	R gene
stu-miR6026-3p	TTCTTGGCTAGAGTTGTATTGC	29.4817	20.4632	8.3325	Score: 2.0	PGSC0003DMT400053065	PGSC0003DMG400020586	Late blight resistance protein	R gene
stu-miR6026-3p	TTCTTGGCTAGAGTTGTATTGC	29.4817	20.4632	8.3325	Score: 2.0	PGSC0003DMT400053067	PGSC0003DMG400020587	Rpi-vnt1	R gene
stu-miR6026-3p	TTCTTGGCTAGAGTTGTATTGC	29.4817	20.4632	8.3325	Score: 2.0	PGSC0003DMT400053069	PGSC0003DMG400020587	Rpi-vnt1	R gene
stu-miR6026-3p	TTCTTGGCTAGAGTTGTATTGC	29.4817	20.4632	8.3325	Score: 2.0	PGSC0003DMT400062608	PGSC0003DMG400024363	Rpi-vnt1	R gene
stu-miR6026-3p	TTCTTGGCTAGAGTTGTATTGC	29.4817	20.4632	8.3325	Score: 2.0	PGSC0003DMT400062609	PGSC0003DMG400024363	Rpi-vnt1	R gene
stu-miR6026-3p	TTCTTGGCTAGAGTTGTATTGC	29.4817	20.4632	8.3325	Score: 2.0	PGSC0003DMT400062611	PGSC0003DMG400024365	Rpi-vnt1	R gene
stu-miR6026-3p	TTCTTGGCTAGAGTTGTATTGC	29.4817	20.4632	8.3325	Score: 2.2	PGSC0003DMT400009715	PGSC0003DMG400003800	Hero resistance protein	R gene
stu-miR6026-3p	TTCTTGGCTAGAGTTGTATTGC	29.4817	20.4632	8.3325	Score: 2.2	PGSC0003DMT400021631	PGSC0003DMG400008393	Cc-nbs-lrr resistance protein	NBS-LRR protein
stu-miR6026-3p	TTCTTGGCTAGAGTTGTATTGC	29.4817	20.4632	8.3325	Score: 2.2	PGSC0003DMT400035133	PGSC0003DMG400013506	Late blight resistance protein homolog R1B-16	R gene
stu-miR6026-3p	TTCTTGGCTAGAGTTGTATTGC	29.4817	20.4632	8.3325	Score: 2.2	PGSC0003DMT400035134	PGSC0003DMG400013506	Late blight resistance protein homolog R1B-16	R gene
stu-miR6027	TGAATCCTTCGGCTATCCATAA	87.0254	40.1207	11.6441	Score: 2.5	PGSC0003DMT400062272	PGSC0003DMG400024231	EDNR2GH7 protein	other
stu-miR6027	TGAATCCTTCGGCTATCCATAA	87.0254	40.1207	11.6441	Score: 2.5	PGSC0003DMT400017461	PGSC0003DMG400006785	Cc-nbs-lrr resistance protein	NBS-LRR protein
stu-miR6027	TGAATCCTTCGGCTATCCATAA	87.0254	40.1207	11.6441	Score: 2.5	PGSC0003DMT400017462	PGSC0003DMG400006785	Cc-nbs-lrr resistance protein	NBS-LRR protein
stu-miR6027	TGAATCCTTCGGCTATCCATAA	87.0254	40.1207	11.6441	Score: 2.5	PGSC0003DMT400066993	PGSC0003DMG401026043	NRC1	NBS-LRR protein
stu-miR6027	TGAATCCTTCGGCTATCCATAA	87.0254	40.1207	11.6441	Score: 2.5	PGSC0003DMT400066996	PGSC0003DMG404026043	NRC1	NBS-LRR protein
stu-miR6027	TGAATCCTTCGGCTATCCATAA	87.0254	40.1207	11.6441	Score: 2.5	PGSC0003DMT400066999	PGSC0003DMG401026043	NRC1	NBS-LRR protein
stu-miR6027	TGAATCCTTCGGCTATCCATAA	87.0254	40.1207	11.6441	Score: 2.5	PGSC0003DMT400075881	PGSC0003DMG400029504	Hero resistance protein	R gene
stu-miR6027	TGAATCCTTCGGCTATCCATAA	87.0254	40.1207	11.6441	Score: 2.0	PGSC0003DMT400033634	PGSC0003DMG400012918	Cc-nbs-lrr resistance protein	NBS-LRR protein
stu-miR6027	TGAATCCTTCGGCTATCCATAA	87.0254	40.1207	11.6441	Score: 2.0	PGSC0003DMT400033635	PGSC0003DMG400012918	Cc-nbs-lrr resistance protein	NBS-LRR protein
stu-miR6027	TGAATCCTTCGGCTATCCATAA	87.0254	40.1207	11.6441	Score: 2.0	PGSC0003DMT400033636	PGSC0003DMG400012918	Cc-nbs-lrr resistance protein	NBS-LRR protein
stu-miR6027	TGAATCCTTCGGCTATCCATAA	87.0254	40.1207	11.6441	Score: 2.0	PGSC0003DMT400047907	PGSC0003DMG400018619	Tospovirus resistance protein B	R gene
stu-miR6027	TGAATCCTTCGGCTATCCATAA	87.0254	40.1207	11.6441	Score: 2.0	PGSC0003DMT400062549	PGSC0003DMG400024337	Hero resistance protein 2 homologue	R gene
stu-miR6027	TGAATCCTTCGGCTATCCATAA	87.0254	40.1207	11.6441	Score: 2.0	PGSC0003DMT400075774	PGSC0003DMG400029462	Hero resistance protein 1 homologue	R gene
stu-miR6027	TGAATCCTTCGGCTATCCATAA	87.0254	40.1207	11.6441	Score: 2.2	PGSC0003DMT400030028	PGSC0003DMG402011522	EDNR2GH4 protein	other
stu-miR6027	TGAATCCTTCGGCTATCCATAA	87.0254	40.1207	11.6441	Score: 2.2	PGSC0003DMT400030030	PGSC0003DMG400011523	HJTR2GH1 protein	NBS-LRR protein
stu-miR6027	TGAATCCTTCGGCTATCCATAA	87.0254	40.1207	11.6441	Score: 2.2	PGSC0003DMT400030034	PGSC0003DMG400011525	EDNR2GH4 protein	other
stu-miR6027	TGAATCCTTCGGCTATCCATAA	87.0254	40.1207	11.6441	Score: 2.2	PGSC0003DMT400042752	PGSC0003DMG400016599	Tospovirus resistance protein C	R gene
stu-miR6027	TGAATCCTTCGGCTATCCATAA	87.0254	40.1207	11.6441	Score: 2.2	PGSC0003DMT400062276	PGSC0003DMG400024234	SNKR2GH5 protein	other
stu-miR6027	TGAATCCTTCGGCTATCCATAA	87.0254	40.1207	11.6441	Score: 2.2	PGSC0003DMT400072845	PGSC0003DMG400028339	Late blight resistance protein	R gene
stu-miR6027	TGAATCCTTCGGCTATCCATAA	87.0254	40.1207	11.6441	Score: 2.2	PGSC0003DMT400072846	PGSC0003DMG400028339	Late blight resistance protein	R gene
stu-miR6027	TGAATCCTTCGGCTATCCATAA	87.0254	40.1207	11.6441	Score: 1.2	PGSC0003DMT400082452	PGSC0003DMG402032547	HJTR2GH1 protein	NBS-LRR protein
stu-miR6027	TGAATCCTTCGGCTATCCATAA	87.0254	40.1207	11.6441	Score: 1.5	PGSC0003DMT400030031	PGSC0003DMG400011524	EDNR2GH3 protein	other
stu-miR6027	TGAATCCTTCGGCTATCCATAA	87.0254	40.1207	11.6441	Score: 1.8	PGSC0003DMT400031132	PGSC0003DMG400011924	SNKR2GH2 protein	other
stu-miR6027	TGAATCCTTCGGCTATCCATAA	87.0254	40.1207	11.6441	Score: 1.8	PGSC0003DMT400016828	PGSC0003DMG400006581	Tospovirus resistance protein A	R gene
stu-miR6027	TGAATCCTTCGGCTATCCATAA	87.0254	40.1207	11.6441	Score: 1.8	PGSC0003DMT400031059	PGSC0003DMG400011898	Tospovirus resistance protein B	R gene
stu-miR6027	TGAATCCTTCGGCTATCCATAA	87.0254	40.1207	11.6441	Score: 1.8	PGSC0003DMT400031066	PGSC0003DMG400011900	Tospovirus resistance protein B	R gene
stu-miR6027	TGAATCCTTCGGCTATCCATAA	87.0254	40.1207	11.6441	Score: 1.8	PGSC0003DMT400042754	PGSC0003DMG400016600	Tospovirus resistance protein E	R gene
stu-miR6149-5p	TTGCAACACACCTGAATCGTC	175.972	121.973	56.5115	Score: 2.5	PGSC0003DMT400055732	PGSC0003DMG400021641	Galactose oxidase	cell wall and Membrane
stu-miR6149-5p	TTGCAACACACCTGAATCGTC	175.972	121.973	56.5115	Score: 2.5	PGSC0003DMT400055733	PGSC0003DMG400021641	Galactose oxidase	cell wall and Membrane
stu-miR6149-5p	TTGCAACACACCTGAATCGTC	175.972	121.973	56.5115	Score: 2.5	PGSC0003DMT400055734	PGSC0003DMG400021641	Galactose oxidase	cell wall and Membrane
stu-miR6149-5p	TTGCAACACACCTGAATCGTC	175.972	121.973	56.5115	Score: 2.5	PGSC0003DMT400074167	PGSC0003DMG400028826	Auxin response factor 6	hormone response
stu-miR6149-5p	TTGCAACACACCTGAATCGTC	175.972	121.973	56.5115	Score: 2.5	PGSC0003DMT400074168	PGSC0003DMG400028826	Auxin response factor 6	hormone response
stu-miR6149-5p	TTGCAACACACCTGAATCGTC	175.972	121.973	56.5115	Score: 2.5	PGSC0003DMT400074169	PGSC0003DMG400028826	Auxin response factor 6	hormone response
stu-miR6149-5p	TTGCAACACACCTGAATCGTC	175.972	121.973	56.5115	Score: 2.5	PGSC0003DMT400074170	PGSC0003DMG400028826	Auxin response factor 6	hormone response
stu-miR6149-5p	TTGCAACACACCTGAATCGTC	175.972	121.973	56.5115	Score: 2.0	PGSC0003DMT400076216	PGSC0003DMG400029632	F-box protein	Transcription factor
stu-miR6149-5p	TTGCAACACACCTGAATCGTC	175.972	121.973	56.5115	Score: 2.0	PGSC0003DMT400093159	PGSC0003DMG400042730	F-box domain-containing protein	Transcription factor
stu-miR7122-3p	ACAGCGTTTCTCTGTATAACC	1.25276	0.322255	0.320481	Score: 2.5	PGSC0003DMT400035495	PGSC0003DMG400013644	Leucine-rich repeat-containing protein	NBS-LRR protein
stu-miR7122-3p	ACAGCGTTTCTCTGTATAACC	1.25276	0.322255	0.320481	Score: 2.5	PGSC0003DMT400035496	PGSC0003DMG400013644	Leucine-rich repeat-containing protein	NBS-LRR protein
stu-miR7122-3p	ACAGCGTTTCTCTGTATAACC	1.25276	0.322255	0.320481	Score: 2.5	PGSC0003DMT400035497	PGSC0003DMG400013644	Leucine-rich repeat-containing protein	NBS-LRR protein
stu-miR7122-3p	ACAGCGTTTCTCTGTATAACC	1.25276	0.322255	0.320481	Score: 2.5	PGSC0003DMT400035498	PGSC0003DMG400013644	Leucine-rich repeat-containing protein	NBS-LRR protein
stu-miR7122-3p	ACAGCGTTTCTCTGTATAACC	1.25276	0.322255	0.320481	Score: 2.0	PGSC0003DMT400005128	PGSC0003DMG400002025	Pentatricopeptide repeat-containing protein	growth
stu-miR8016	ATTTTTGAATGGAAGGCCCATGTG	7.76714	1.61127	1.6024	Score: 1.2	PGSC0003DMT400089119	PGSC0003DMG400038690	Conserved gene of unknown function	unknown
stu-miR8033-5p	TTCCAAAGCTGCAGAAATGAGT	1.58684	0.644509	0.320481	Score: 2.5	PGSC0003DMT400016364	PGSC0003DMG400006397	Peptidase aspartic, active site	other
stu-miR8033-5p	TTCCAAAGCTGCAGAAATGAGT	1.58684	0.644509	0.320481	Score: 2.5	PGSC0003DMT400046894	PGSC0003DMG400018216	TMV resistance protein N	R gene
stu-miR8033-5p	TTCCAAAGCTGCAGAAATGAGT	1.58684	0.644509	0.320481	Score: 2.2	PGSC0003DMT400015703	PGSC0003DMG400006137	Membrane protein	cell wall and Membrane
stu-miR8033-5p	TTCCAAAGCTGCAGAAATGAGT	1.58684	0.644509	0.320481	Score: 2.2	PGSC0003DMT400045741	PGSC0003DMG400017738	BRASSINOSTEROID INSENSITIVE 1-associated receptor kinase 1	kinase
stu-miR8036-5p	GGAGGAATCGAAAGATATAAG	0.668141	0.161127	0.320481	Score: 2.5	PGSC0003DMT400078515	PGSC0003DMG400030564	Phosphatidylserine synthase	other enzyme
stu-miR8036-5p	GGAGGAATCGAAAGATATAAG	0.668141	0.161127	0.320481	Score: 2.5	PGSC0003DMT400078517	PGSC0003DMG400030564	Phosphatidylserine synthase	other enzyme
stu-miR8036-5p	GGAGGAATCGAAAGATATAAG	0.668141	0.161127	0.320481	Score: 2.5	PGSC0003DMT400078518	PGSC0003DMG400030564	Phosphatidylserine synthase	other enzyme
stu-miR8039	TTTCCTATCTGAACTATCACC	1.58684	2.33635	1.49558	Score: 2.5	PGSC0003DMT400059979	PGSC0003DMG402023336	MT-A70 family protein	other
stu-miR8039	TTTCCTATCTGAACTATCACC	1.58684	2.33635	1.49558	Score: 2.5	PGSC0003DMT400059980	PGSC0003DMG402023336	MT-A70 family protein	other
stu-miR8039	TTTCCTATCTGAACTATCACC	1.58684	2.33635	1.49558	Score: 2.5	PGSC0003DMT400009831	PGSC0003DMG400003849	GID1-like gibberellin receptor	hormone response
stu-miR8039	TTTCCTATCTGAACTATCACC	1.58684	2.33635	1.49558	Score: 2.0	PGSC0003DMT400064590	PGSC0003DMG400025100	F-box family protein	Transcription factor
stu-miR8039	TTTCCTATCTGAACTATCACC	1.58684	2.33635	1.49558	Score: 2.2	PGSC0003DMT400058203	PGSC0003DMG401022600	MYC1	Transcription factor
stu-miR8039	TTTCCTATCTGAACTATCACC	1.58684	2.33635	1.49558	Score: 2.2	PGSC0003DMT400058204	PGSC0003DMG401022600	MYC1	Transcription factor
stu-miR8039	TTTCCTATCTGAACTATCACC	1.58684	2.33635	1.49558	Score: 1.5	PGSC0003DMT400004833	PGSC0003DMG400001920	Translin family protein	other
stu-miR8039	TTTCCTATCTGAACTATCACC	1.58684	2.33635	1.49558	Score: 1.5	PGSC0003DMT400004835	PGSC0003DMG400001920	Translin family protein	other
stu-miR8039	TTTCCTATCTGAACTATCACC	1.58684	2.33635	1.49558	Score: 1.5	PGSC0003DMT400004836	PGSC0003DMG400001920	Translin family protein	other
stu-miR8044-3p	TCTCCAGCGATATTTGAAACT	1.00221	0.8862	0.106827	Score: 2.5	PGSC0003DMT400064009	PGSC0003DMG400024880	Conserved gene of unknown function	unknown
stu-miR8044-3p	TCTCCAGCGATATTTGAAACT	1.00221	0.8862	0.106827	Score: 2.5	PGSC0003DMT400064010	PGSC0003DMG400024880	Conserved gene of unknown function	unknown
stu-miR8044-3p	TCTCCAGCGATATTTGAAACT	1.00221	0.8862	0.106827	Score: 2.2	PGSC0003DMT400083243	PGSC0003DMG400033138	Limonene cyclase	secondary product
stu-miR8044-3p	TCTCCAGCGATATTTGAAACT	1.00221	0.8862	0.106827	Score: 2.2	PGSC0003DMT400083244	PGSC0003DMG400033138	Limonene cyclase	secondary product
stu-miR8051-5p	TAGTATGGTAGAAAGATTCA	0.584623	0.402818	0.213654	Score: 2.5	PGSC0003DMT400016042	PGSC0003DMG401006272	Gene of unknown function	unknown
stu-miR8051-5p	TAGTATGGTAGAAAGATTCA	0.584623	0.402818	0.213654	Score: 2.5	PGSC0003DMT400016043	PGSC0003DMG401006272	Gene of unknown function	unknown
stu-miR8051-5p	TAGTATGGTAGAAAGATTCA	0.584623	0.402818	0.213654	Score: 2.5	PGSC0003DMT400016044	PGSC0003DMG401006272	Gene of unknown function	unknown
stu-miR8051-5p	TAGTATGGTAGAAAGATTCA	0.584623	0.402818	0.213654	Score: 2.5	PGSC0003DMT400016045	PGSC0003DMG401006272	Gene of unknown function	unknown
stu-miR8051-5p	TAGTATGGTAGAAAGATTCA	0.584623	0.402818	0.213654	Score: 2.5	PGSC0003DMT400074820	PGSC0003DMG400029093	Gene of unknown function	unknown
stu-miR8051-5p	TAGTATGGTAGAAAGATTCA	0.584623	0.402818	0.213654	Score: 2.5	PGSC0003DMT400097320	PGSC0003DMG400046891	Glucose-1-phosphate adenylyltransferase	cell wall and Membrane
stu-miR8051-5p	TAGTATGGTAGAAAGATTCA	0.584623	0.402818	0.213654	Score: 2.5	PGSC0003DMT400026433	PGSC0003DMG400010198	Conserved gene of unknown function	unknown
stu-miR8051-5p	TAGTATGGTAGAAAGATTCA	0.584623	0.402818	0.213654	Score: 2.2	PGSC0003DMT400042837	PGSC0003DMG400016619	Cytochrome P450	growth
stu-miR8051-5p	TAGTATGGTAGAAAGATTCA	0.584623	0.402818	0.213654	Score: 2.2	PGSC0003DMT400084983	PGSC0003DMG400034554	Pentatricopeptide repeat-containing protein	growth
stu-miR8051-5p	TAGTATGGTAGAAAGATTCA	0.584623	0.402818	0.213654	Score: 1.5	PGSC0003DMT400067579	PGSC0003DMG400026275	O-methyltransferase	other
stu-miR8051-5p	TAGTATGGTAGAAAGATTCA	0.584623	0.402818	0.213654	Score: 1.8	PGSC0003DMT400084282	PGSC0003DMG400033910	ATP-dependent Clp protease proteolytic subunit	other
