# Supplementary material for: Identification of miRNAs Involving Potato-Phytophthora infestans Interaction
Source: Plants (Basel). 2023 Jan 19;12(3):461. doi: 10.3390/plants12030461 (PMC9921761; doi:10.3390/plants12030461)
Supplement: Supplementary file 1 [file plants-12-00461-s001.zip › Table S3 P. infestans target genes by 53 potato miRNAs.xlsx]

## Sheet: potato targets P.i
NO.	reads	24hpotato	36hpotato	48hpotato	Score	target	annotation
stu-miR530	TCTGCATTTGCACCTGCACCT	1.419799928	0.241691045	0	Score: 2.5	PITG_00038	myb-like DNA-binding protein, putative (2903 nt)
novel93	CTTGGCCTGTAGTAGGTA	10.1056	13.293	5.98231	Score: 2.5	PITG_00220	general transcription factor IIH subunit, putative (882 nt)
novel97	GCATCCATGGCTGAATGG	1.08573	0.644509	0.534135	Score: 2.5	PITG_00331	cysteine protease family C48, putative (1227 nt) Note(s): At least one base has a quality score < 10
stu-miR530	TCTGCATTTGCACCTGCACCT	1.419799928	0.241691045	0	Score: 2.5	PITG_00331	cysteine protease family C48, putative (2787 nt)
novel127	TTCAGATGAGAACTTTGA	1.08573	0.725073	0.427308	Score: 2.5	PITG_00626	conserved hypothetical protein (1668 nt) Note(s): At least one base has a quality score < 10
stu-miR8033-5p	TTCCAAAGCTGCAGAAATGAGT	1.586835214	0.644509452	0.320480944	Score: 2.5	PITG_00828	phosphatidylinositol kinase (PIK-5) (10555 nt)
novel93	CTTGGCCTGTAGTAGGTA	10.1056	13.293	5.98231	Score: 2.5	PITG_00937	sporangia induced hypothetical protein (2361 nt) Note(s): At least one base has a quality score < 10
novel97	GCATCCATGGCTGAATGG	1.08573	0.644509	0.534135	Score: 2.5	PITG_01211	transmembrane protein, putative (1710 nt)
stu-miR167b-3p	TCGATAAACCTCTGCATCCAG	2.338494	1.852964675	0.427307925	Score: 2.5	PITG_01219	conserved hypothetical protein (1646 nt)
novel21	AAGCTAGAGGTGTCAGAA	1.83739	1.20846	0.961443	Score: 2.5	PITG_01509	conserved hypothetical protein (1212 nt)
novel138	TTTCATCGTGATGGGGATA	69.4032	70.2515	42.3035	Score: 2.0	PITG_01717	dynein heavy chain (13965 nt) Note(s): At least one base has a quality score < 10
novel85	ATTGTTGCTCATGGGATGGAG	1.25276	0.402818	0	Score: 2.5	PITG_01846	actin-related protein 2/3 complex subunit, putative (1614 nt) Note(s): At least one base has a qualit
novel135	TTGGTTGAGTGAGCATCTAAG	430.533	360.684	97.3194	Score: 2.5	PITG_01895	ATP-binding Cassette (ABC) Superfamily (1344 nt) Note(s): At least one base has a quality score < 10
novel99	GGGCTATTAGCTCAGTGG	1.33628	1.45015	0.640962	Score: 2.5	PITG_02020	hypothetical protein (2490 nt) Note(s): At least one base has a quality score < 10
novel138	TTTCATCGTGATGGGGATA	69.4032	70.2515	42.3035	Score: 2.5	PITG_02256	aspartate aminotransferase, mitochondrial precursor (1281 nt)
novel127	TTCAGATGAGAACTTTGA	1.08573	0.725073	0.427308	Score: 1.8	PITG_02401	phosphatidylinositol-3,4,5-trisphosphate 3-phosphatase, putative (2535 nt) Note(s): At least one base
novel138	TTTCATCGTGATGGGGATA	69.4032	70.2515	42.3035	Score: 1.8	PITG_02430	conserved hypothetical protein (1488 nt) Note(s): At least one base has a quality score < 10
novel30	AATCCTTCAGCAATCCATA	9.18694	3.70593	1.28192	Score: 2.0	PITG_02482	ATP-dependent RNA helicase DHX8 (3477 nt) Note(s): At least one base has a quality score < 10
novel39	ACCAAGGAGTCTGACATG	11.0243	6.84791	3.09798	Score: 2.5	PITG_02484	maspardin-like protein (834 nt) Note(s): At least one base has a quality score < 10
miR394	TTGGCATTCTGTCCACCTCC	94.9596	29.6474	11.2168	Score: 2.0	PITG_02598	conserved hypothetical protein (1962 nt) Note(s): At least one base has a quality score < 10
novel99	GGGCTATTAGCTCAGTGG	1.33628	1.45015	0.640962	Score: 2.5	PITG_02662	ubiquitin family protein, putative (852 nt)
novel132	TTGCTTTGTTCTTTGTTCGAG	0.584623	0.8862	0	Score: 2.0	PITG_02691	hypothetical protein (3231 nt) Note(s): At least one base has a quality score < 10
novel21	AAGCTAGAGGTGTCAGAA	1.83739	1.20846	0.961443	Score: 2.5	PITG_02730	conserved hypothetical protein (3921 nt) Note(s): At least one base has a quality score < 10
miR398	TGTGTTCTCAGGTCGCCCCTG	2.42201	2.57804	0.427308	Score: 2.5	PITG_02840	WD repeat-containing protein srw1 (1851 nt)
novel138	TTTCATCGTGATGGGGATA	69.4032	70.2515	42.3035	Score: 2.2	PITG_02976	conserved hypothetical protein (2940 nt) Note(s): At least one base has a quality score < 10
novel138	TTTCATCGTGATGGGGATA	69.4032	70.2515	42.3035	Score: 2.5	PITG_03018	sporangia induced dynein heavy chain (12567 nt) Note(s): At least one base has a quality score < 10
stu-miR530	TCTGCATTTGCACCTGCACCT	1.419799928	0.241691045	0	Score: 2.5	PITG_03148	Rab7 family GTPase, putative (984 nt)
novel138	TTTCATCGTGATGGGGATA	69.4032	70.2515	42.3035	Score: 2.5	PITG_03151	calcineurin-like phosphoesterase, putative (1971 nt)
novel138	TTTCATCGTGATGGGGATA	69.4032	70.2515	42.3035	Score: 2.0	PITG_03180	dynein heavy chain (13683 nt) Note(s): At least one base has a quality score < 10
stu-miR171b-3p	TTGAGCCGCGTCAATATCTCT	2.422011643	1.691837312	0.640961887	Score: 2.0	PITG_03180	dynein heavy chain (13683 nt)
novel138	TTTCATCGTGATGGGGATA	69.4032	70.2515	42.3035	Score: 2.5	PITG_03198	conserved hypothetical protein (4251 nt) Note(s): At least one base has a quality score < 10
novel138	TTTCATCGTGATGGGGATA	69.4032	70.2515	42.3035	Score: 2.5	PITG_03232	conserved hypothetical protein (2400 nt) Note(s): At least one base has a quality score < 10
novel14	AACGGATAAGATTGTGCCACGTGT	1.58684	1.20846	0.320481	Score: 2.5	PITG_03362	HECT E3 ubiquitin ligase, putative (1587 nt) Note(s): At least one base has a quality score < 10
novel21	AAGCTAGAGGTGTCAGAA	1.83739	1.20846	0.961443	Score: 2.5	PITG_03433	regulator of chromosome condensation (RCC1)-like protein (12147 nt) Note(s): At least one base has a
novel93	CTTGGCCTGTAGTAGGTA	10.1056	13.293	5.98231	Score: 2.0	PITG_03491	myosin-like protein (2103 nt) Note(s): At least one base has a quality score < 10
novel91	CATTGGACTCTGAATCCA	2.67256	1.69184	0.427308	Score: 2.5	PITG_03562	conserved hypothetical protein (1695 nt)
novel127	TTCAGATGAGAACTTTGA	1.08573	0.725073	0.427308	Score: 2.0	PITG_03572	hypothetical protein (1797 nt)
novel39	ACCAAGGAGTCTGACATG	11.0243	6.84791	3.09798	Score: 2.2	PITG_03575	anoctamin-like protein (2298 nt)
novel97	GCATCCATGGCTGAATGG	1.08573	0.644509	0.534135	Score: 2.5	PITG_03630	conserved hypothetical protein (1773 nt)
novel98	GCGTAGGCCTCCCAAAAGG	9.52101	8.05637	2.7775	Score: 2.5	PITG_03779	anaphase-promoting complex subunit, putative (5727 nt) Note(s): At least one base has a quality score
miR396	TTCCACAGCTTTCTTGAACTG	226.416	115.609	47.2175	Score: 2.2	PITG_03789	conserved hypothetical protein (6930 nt) Note(s): At least one base has a quality score < 10
novel99	GGGCTATTAGCTCAGTGG	1.33628	1.45015	0.640962	Score: 2.5	PITG_04294	12-oxophytodienoate reductase, putative (1143 nt) Note(s): At least one base has a quality score < 10
novel97	GCATCCATGGCTGAATGG	1.08573	0.644509	0.534135	Score: 2.5	PITG_04651	exportin-like protein (3756 nt) Note(s): At least one base has a quality score < 10
novel46	ACTGACAGAAGAGAGTGAGC	9.01991	3.46424	1.38875	Score: 2.5	PITG_04715	pantothenate kinase, putative (1314 nt)
novel99	GGGCTATTAGCTCAGTGG	1.33628	1.45015	0.640962	Score: 2.5	PITG_05079	glycosyltransferase (6744 nt) Note(s): At least one base has a quality score < 10
novel132	TTGCTTTGTTCTTTGTTCGAG	0.584623	0.8862	0	Score: 2.2	PITG_05278	conserved hypothetical protein (2376 nt)
novel99	GGGCTATTAGCTCAGTGG	1.33628	1.45015	0.640962	Score: 2.5	PITG_05444	conserved hypothetical protein (12147 nt) Note(s): At least one base has a quality score < 10
novel105	TATTGTAGTTGATTTGATGAG	0.751659	0.644509	0	Score: 2.5	PITG_05655	conserved hypothetical protein (4401 nt) Note(s): At least one base has a quality score < 10
novel126	TTATTGTAGTTGATTTGATGA	0.501106	0.644509	0	Score: 2.5	PITG_05655	conserved hypothetical protein (4401 nt) Note(s): At least one base has a quality score < 10
novel133	TTGGCAGCGATTTTTGTAGAAA	0.417588	0.805637	1.38875	Score: 2.5	PITG_05949	conserved hypothetical protein (1689 nt) Note(s): At least one base has a quality score < 10
novel1	AAAACGGGGTTGTGGGAGAGC	2.50553	6.28397	14.3148	Score: 2.5	PITG_06080	RXLR effector family protein, putative (1812 nt)
novel126	TTATTGTAGTTGATTTGATGA	0.501106	0.644509	0	Score: 2.2	PITG_06224	conserved hypothetical protein (675 nt)
novel21	AAGCTAGAGGTGTCAGAA	1.83739	1.20846	0.961443	Score: 2.5	PITG_06271	conserved hypothetical protein (2604 nt)
novel97	GCATCCATGGCTGAATGG	1.08573	0.644509	0.534135	Score: 2.0	PITG_06380	conserved hypothetical protein (5856 nt)
novel93	CTTGGCCTGTAGTAGGTA	10.1056	13.293	5.98231	Score: 2.5	PITG_06474	conserved hypothetical protein (1140 nt)
novel105	TATTGTAGTTGATTTGATGAG	0.751659	0.644509	0	Score: 2.5	PITG_06630	conserved hypothetical protein (5532 nt)
novel39	ACCAAGGAGTCTGACATG	11.0243	6.84791	3.09798	Score: 2.5	PITG_06662	conserved hypothetical protein (1944 nt)
novel61	ATACCGATTCGATCCGAGC	0	0.725073	0.427308	Score: 1.8	PITG_06741	conserved hypothetical protein (8085 nt) Note(s): At least one base has a quality score < 10
novel89	ATTTTCCTTGGGATTAGTATG	1.25276	0.644509	0.427308	Score: 2.5	PITG_06836	conserved hypothetical protein (522 nt) Note(s): At least one base has a quality score < 10
stu-miR167d-3p	GATCATGTGGTTGCTTCACC	3.090152786	3.464238305	1.068269812	Score: 2.5	PITG_07119	conserved hypothetical protein (1135 nt)
miR1919	ACGAGAGTCATCTGTGACAGG	16.2859	22.4773	6.83693	Score: 2.0	PITG_07176	conserved hypothetical protein (1656 nt)
stu-miR162b-5p	GGAGGCAGCGGTTCATCGATC	8.35176	4.511566165	1.709231699	Score: 2.2	PITG_07192	conserved hypothetical protein (4665 nt)
novel91	CATTGGACTCTGAATCCA	2.67256	1.69184	0.427308	Score: 2.0	PITG_07205	conserved hypothetical protein (1533 nt) Note(s): At least one base has a quality score < 10
novel91	CATTGGACTCTGAATCCA	2.67256	1.69184	0.427308	Score: 2.5	PITG_07214	protein kinase, putative (1887 nt)
novel106	TATTGTGGCATTGATGAGATC	0.918694	0.402818	0.320481	Score: 2.5	PITG_07302	histone acetyltransferase, putative (6885 nt)
novel133	TTGGCAGCGATTTTTGTAGAAA	0.417588	0.805637	1.38875	Score: 2.5	PITG_07309	flagellar radial spoke protein (1548 nt)
novel114	TGATATTTGGAGTACTGAGGC	1.83739	2.6586	0	Score: 2.5	PITG_07765	conserved hypothetical protein (2592 nt) Note(s): At least one base has a quality score < 10
stu-miR6024-3p	TTTTAGCAAGAGTTGTTTTCCC	48.69078578	22.2355761	10.2553902	Score: 1.5	PITG_07877	conserved hypothetical protein (1098 nt)
novel114	TGATATTTGGAGTACTGAGGC	1.83739	2.6586	0	Score: 2.2	PITG_07943	phospholipid-transporting ATPase, putative (7899 nt) Note(s): At least one base has a quality score <
novel138	TTTCATCGTGATGGGGATA	69.4032	70.2515	42.3035	Score: 2.2	PITG_07943	phospholipid-transporting ATPase, putative (7899 nt) Note(s): At least one base has a quality score <
novel93	CTTGGCCTGTAGTAGGTA	10.1056	13.293	5.98231	Score: 2.5	PITG_07991	glutamate-cysteine ligase catalytic subunit, putative (2292 nt)
novel114	TGATATTTGGAGTACTGAGGC	1.83739	2.6586	0	Score: 2.2	PITG_08101	conserved hypothetical protein (1962 nt)
miR394	TTGGCATTCTGTCCACCTCC	94.9596	29.6474	11.2168	Score: 2.5	PITG_08162	fibronectin type III domain-containing protein (3765 nt) Note(s): At least one base has a quality sco
miR394	TTGGCATTCTGTCCACCTCC	94.9596	29.6474	11.2168	Score: 2.5	PITG_08163	conserved hypothetical protein (3003 nt) Note(s): At least one base has a quality score < 10
miR394	TTGGCATTCTGTCCACCTCC	94.9596	29.6474	11.2168	Score: 2.5	PITG_08164	fibronectin type III domain-containing protein (4443 nt) Note(s): At least one base has a quality sco
miR394	TTGGCATTCTGTCCACCTCC	94.9596	29.6474	11.2168	Score: 2.5	PITG_08165	conserved hypothetical protein (3669 nt) Note(s): At least one base has a quality score < 10
miR394	TTGGCATTCTGTCCACCTCC	94.9596	29.6474	11.2168	Score: 2.5	PITG_08166	fibronectin type III domain-containing protein (4839 nt) Note(s): At least one base has a quality sco
miR394	TTGGCATTCTGTCCACCTCC	94.9596	29.6474	11.2168	Score: 2.5	PITG_08167	fibronectin type III domain-containing protein (5199 nt) Note(s): At least one base has a quality sco
miR394	TTGGCATTCTGTCCACCTCC	94.9596	29.6474	11.2168	Score: 2.5	PITG_08168	fibronectin type III domain-containing protein (5142 nt) Note(s): At least one base has a quality sco
miR394	TTGGCATTCTGTCCACCTCC	94.9596	29.6474	11.2168	Score: 2.5	PITG_08169	fibronectin type III domain-containing protein (5142 nt) Note(s): At least one base has a quality sco
miR394	TTGGCATTCTGTCCACCTCC	94.9596	29.6474	11.2168	Score: 2.5	PITG_08170	fibronectin type III domain-containing protein (4197 nt) Note(s): At least one base has a quality sco
novel140	TTTCGATCACTGGTATGCCGG	2.75608	2.81973	1.70923	Score: 2.5	PITG_08205	methionyl-tRNA formyltransferase, putative (1131 nt)
stu-miR8044-3p	TCTCCAGCGATATTTGAAACT	1.002211714	0.886200497	0.106826981	Score: 2.5	PITG_08216	WD domain-containing protein, putative (4192 nt)
novel93	CTTGGCCTGTAGTAGGTA	10.1056	13.293	5.98231	Score: 2.5	PITG_08230	vacuolar protein sorting-associated protein, putative (10689 nt) Note(s): At least one base has a qua
stu-miR167b-3p	TCGATAAACCTCTGCATCCAG	2.338494	1.852964675	0.427307925	Score: 2.5	PITG_08460	lipin-like protein (2193 nt)
novel114	TGATATTTGGAGTACTGAGGC	1.83739	2.6586	0	Score: 2.2	PITG_08686	conserved hypothetical protein (1146 nt) Note(s): At least one base has a quality score < 10
novel93	CTTGGCCTGTAGTAGGTA	10.1056	13.293	5.98231	Score: 2.0	PITG_08954	conserved hypothetical protein (2823 nt) Note(s): At least one base has a quality score < 10
stu-miR319-3p	TTGGACTGAAGGGTTCCCTTC	2.338494	8.056368152	11.75096793	Score: 2.2	PITG_09002	hypothetical protein (1045 nt)
novel133	TTGGCAGCGATTTTTGTAGAAA	0.417588	0.805637	1.38875	Score: 2.5	PITG_09123	conserved hypothetical protein (2748 nt)
novel93	CTTGGCCTGTAGTAGGTA	10.1056	13.293	5.98231	Score: 2.5	PITG_09279	bZIP transcription factor, putative (1224 nt) Note(s): At least one base has a quality score < 10
novel93	CTTGGCCTGTAGTAGGTA	10.1056	13.293	5.98231	Score: 2.5	PITG_09280	bZIP transcription factor, putative (1419 nt) Note(s): At least one base has a quality score < 10
novel85	ATTGTTGCTCATGGGATGGAG	1.25276	0.402818	0	Score: 2.5	PITG_09413	sterol 3-beta-glucosyltransferase, putative (4530 nt)
novel138	TTTCATCGTGATGGGGATA	69.4032	70.2515	42.3035	Score: 2.2	PITG_09702	conserved hypothetical protein (1671 nt) Note(s): At least one base has a quality score < 10
novel30	AATCCTTCAGCAATCCATA	9.18694	3.70593	1.28192	Score: 2.2	PITG_09979	conserved hypothetical protein (960 nt)
novel93	CTTGGCCTGTAGTAGGTA	10.1056	13.293	5.98231	Score: 2.5	PITG_09981	conserved hypothetical protein (879 nt)
novel127	TTCAGATGAGAACTTTGA	1.08573	0.725073	0.427308	Score: 1.5	PITG_09983	protocadherin Fat-like protein (10467 nt)
novel138	TTTCATCGTGATGGGGATA	69.4032	70.2515	42.3035	Score: 2.5	PITG_10031	lysosomal alpha-mannosidase, putative (3072 nt) Note(s): At least one base has a quality score < 10
novel99	GGGCTATTAGCTCAGTGG	1.33628	1.45015	0.640962	Score: 2.2	PITG_10105	exportin-T, putative (3033 nt) Note(s): At least one base has a quality score < 10
stu-miR530	TCTGCATTTGCACCTGCACCT	1.419799928	0.241691045	0	Score: 1.2	PITG_10208	conserved hypothetical protein (551 nt)
novel88	ATTTTCATGGGGATTAGTATG	1.67035	1.53071	0.640962	Score: 2.5	PITG_10459	conserved hypothetical protein (417 nt) Note(s): At least one base has a quality score < 10
novel97	GCATCCATGGCTGAATGG	1.08573	0.644509	0.534135	Score: 2.0	PITG_10514	kinesin-like protein (1533 nt) Note(s): At least one base has a quality score < 10
stu-miR4376-5p	TACGCAGGAGAGATGATGCTG	64.64265557	35.28689251	14.52846944	Score: 2.2	PITG_10875	respiratory burst oxidase (2024 nt)
novel111	TCTAGTTGTTGCAATAATTCT	0.835176	1.45015	0.534135	Score: 2.0	PITG_10953	protein kinase (2040 nt) Note(s): At least one base has a quality score < 10
novel46	ACTGACAGAAGAGAGTGAGC	9.01991	3.46424	1.38875	Score: 2.0	PITG_11010	conserved hypothetical protein (2991 nt) Note(s): At least one base has a quality score < 10
novel21	AAGCTAGAGGTGTCAGAA	1.83739	1.20846	0.961443	Score: 2.5	PITG_11118	conserved hypothetical protein (1305 nt) Note(s): At least one base has a quality score < 10
novel97	GCATCCATGGCTGAATGG	1.08573	0.644509	0.534135	Score: 2.5	PITG_11193	conserved hypothetical protein (831 nt) Note(s): At least one base has a quality score < 10
novel127	TTCAGATGAGAACTTTGA	1.08573	0.725073	0.427308	Score: 2.0	PITG_11562	myb-like DNA-binding protein, putative (687 nt) Note(s): At least one base has a quality score < 10
stu-miR162b-5p	GGAGGCAGCGGTTCATCGATC	8.351764285	4.511566165	1.709231699	Score: 2.5	PITG_11780	conserved hypothetical protein (5416 nt)
stu-miR530	TCTGCATTTGCACCTGCACCT	1.419799928	0.241691045	0	Score: 2.0	PITG_11832	conserved hypothetical protein (1280 nt)
novel111	TCTAGTTGTTGCAATAATTCT	0.835176	1.45015	0.534135	Score: 2.5	PITG_11846	conserved hypothetical protein (2283 nt) Note(s): At least one base has a quality score < 10
miR156	TGACAGAAGAGAGTGAGCAC	0.918694	0.805637	0.320481	Score: 2.5	PITG_11993	glycoside hydrolase, putative (1617 nt) Note(s): At least one base has a quality score < 10
novel21	AAGCTAGAGGTGTCAGAA	1.83739	1.20846	0.961443	Score: 2.5	PITG_12023	Crinkler (CRN) family protein (2532 nt) Note(s): At least one base has a quality score < 10
stu-miR530	TCTGCATTTGCACCTGCACCT	1.419799928	0.241691045	0	Score: 2.0	PITG_12110	peroxisomal targeting signal 1 receptor, putative (2251 nt)
miR396	TTCCACAGCTTTCTTGAACTG	226.416	115.609	47.2175	Score: 2.2	PITG_12185	26S protease regulatory subunit 4 (1338 nt) Note(s): At least one base has a quality score < 10
novel91	CATTGGACTCTGAATCCA	2.67256	1.69184	0.427308	Score: 2.5	PITG_12484	conserved hypothetical protein (1401 nt)
novel91	CATTGGACTCTGAATCCA	2.67256	1.69184	0.427308	Score: 2.0	PITG_12547	transmembrane protein, putative (20163 nt) Note(s): At least one base has a quality score < 10
novel85	ATTGTTGCTCATGGGATGGAG	1.25276	0.402818	0	Score: 2.5	PITG_12562	elicitin-like protein (534 nt) Note(s): At least one base has a quality score < 10
novel138	TTTCATCGTGATGGGGATA	69.4032	70.2515	42.3035	Score: 2.0	PITG_12577	sporangia induced dynein heavy chain (13644 nt) Note(s): At least one base has a quality score < 10
stu-miR530	TCTGCATTTGCACCTGCACCT	1.419799928	0.241691045	0	Score: 2.2	PITG_12686	conserved hypothetical protein (930 nt)
novel133	TTGGCAGCGATTTTTGTAGAAA	0.417588	0.805637	1.38875	Score: 2.5	PITG_12774	conserved hypothetical protein (318 nt) Note(s): At least one base has a quality score < 10
novel138	TTTCATCGTGATGGGGATA	69.4032	70.2515	42.3035	Score: 2.2	PITG_12959	conserved hypothetical protein (822 nt) Note(s): At least one base has a quality score < 10
stu-miR4376-5p	TACGCAGGAGAGATGATGCTG	64.64265557	35.28689251	14.52846944	Score: 2.5	PITG_13024	conserved hypothetical protein (1443 nt)
stu-miR171b-3p	TTGAGCCGCGTCAATATCTCT	2.422011643	1.691837312	0.640961887	Score: 1.5	PITG_13167	conserved hypothetical protein (1874 nt)
miR156	TGACAGAAGAGAGTGAGCAC	0.918694	0.805637	0.320481	Score: 2.5	PITG_13186	signal peptide peptidase-like protein (2289 nt)
miR396	TTCCACAGCTTTCTTGAACTG	226.416	115.609	47.2175	Score: 2.5	PITG_13262	cystathionine beta-synthase (1542 nt) Note(s): At least one base has a quality score < 10
novel21	AAGCTAGAGGTGTCAGAA	1.83739	1.20846	0.961443	Score: 2.5	PITG_13315	cGMP-dependent protein kinase, putative (2301 nt)
novel21	AAGCTAGAGGTGTCAGAA	1.83739	1.20846	0.961443	Score: 2.0	PITG_13362	microtubule-associated protein, putative (7029 nt) Note(s): At least one base has a quality score < 1
novel98	GCGTAGGCCTCCCAAAAGG	9.52101	8.05637	2.7775	Score: 2.5	PITG_13362	microtubule-associated protein, putative (7029 nt) Note(s): At least one base has a quality score < 1
novel61	ATACCGATTCGATCCGAGC	0	0.725073	0.427308	Score: 1.5	PITG_13566	glycoside hydrolase, putative (1530 nt) Note(s): At least one base has a quality score < 10
novel61	ATACCGATTCGATCCGAGC	0	0.725073	0.427308	Score: 1.5	PITG_13567	endo-1,3(4)-beta-glucanase, putative (2700 nt) Note(s): At least one base has a quality score < 10
novel61	ATACCGATTCGATCCGAGC	0	0.725073	0.427308	Score: 1.5	PITG_13569	endo-1,3(4)-beta-glucanase, putative (2415 nt) Note(s): At least one base has a quality score < 10
novel61	ATACCGATTCGATCCGAGC	0	0.725073	0.427308	Score: 1.5	PITG_13571	endo-1,3(4)-beta-glucanase, putative (2349 nt) Note(s): At least one base has a quality score < 10
miR396	TTCCACAGCTTTCTTGAACTG	226.416	115.609	47.2175	Score: 2.5	PITG_13614	malate dehydrogenase, mitochondrial precursor (1008 nt)
stu-miR167b-3p	TCGATAAACCTCTGCATCCAG	2.33849	1.852964675	0.427307925	Score: 2.2	PITG_13620	conserved hypothetical protein (3219 nt)
miR396	TTCCACAGCTTTCTTGAACTG	226.416	115.609	47.2175	Score: 2.5	PITG_13920	phosphatidylinositol kinase (PIK-D) (3069 nt) Note(s): At least one base has a quality score < 10
novel97	GCATCCATGGCTGAATGG	1.08573	0.644509	0.534135	Score: 2.5	PITG_13946	conserved hypothetical protein (1110 nt) Note(s): At least one base has a quality score < 10
novel97	GCATCCATGGCTGAATGG	1.08573	0.644509	0.534135	Score: 2.5	PITG_13949	conserved hypothetical protein (1062 nt) Note(s): At least one base has a quality score < 10
novel85	ATTGTTGCTCATGGGATGGAG	1.25276	0.402818	0	Score: 2.5	PITG_14005	conserved hypothetical protein (1530 nt)
stu-miR167d-3p	GATCATGTGGTTGCTTCACC	3.090152786	3.464238305	1.068269812	Score: 2.5	PITG_14055	alcohol dehydrogenase, putative (1170 nt)
novel127	TTCAGATGAGAACTTTGA	1.08573	0.725073	0.427308	Score: 2.5	PITG_14058	Folate-Biopterin Transporter (FBT) Family (1623 nt) Note(s): At least one base has a quality score <
novel46	ACTGACAGAAGAGAGTGAGC	9.01991	3.46424	1.38875	Score: 2.5	PITG_14286	conserved hypothetical protein (1782 nt) Note(s): At least one base has a quality score < 10
stu-miR8051-5p	TAGTATGGTAGAAAGATTCA	0.5846235	0.402818408	0.213653962	Score: 2.5	PITG_14401	myb-like DNA-binding protein, putative (4060 nt)
novel105	TATTGTAGTTGATTTGATGAG	0.751659	0.644509	0	Score: 2.5	PITG_14674	Multidrug/Oligosaccharidyl-lipid/Polysaccharide (MOP) Flippase Superfamily (2100 nt) Note(s): At leas
novel93	CTTGGCCTGTAGTAGGTA	10.1056	13.293	5.98231	Score: 2.5	PITG_15046	conserved hypothetical protein (696 nt) Note(s): At least one base has a quality score < 10
miR394	TTGGCATTCTGTCCACCTCC	94.9596	29.6474	11.2168	Score: 2.5	PITG_15141	conserved hypothetical protein (2175 nt)
stu-miR8036-5p	GGAGGAATCGAAAGATATAAG	0.668141143	0.161127363	0.320480944	Score: 2.5	PITG_15228	transmembrane protein, putative (2191 nt)
novel72	ATGACGTGACCGAATTATAATTGG	1.92091	2.33635	1.81606	Score: 2.2	PITG_15260	conserved hypothetical protein (1035 nt)
novel72	ATGACGTGACCGAATTATAATTGG	1.92091	2.33635	1.81606	Score: 2.2	PITG_15263	transmembrane protein, putative (1965 nt)
novel21	AAGCTAGAGGTGTCAGAA	1.83739	1.20846	0.961443	Score: 2.0	PITG_15600	conserved hypothetical protein (1308 nt) Note(s): At least one base has a quality score < 10
novel138	TTTCATCGTGATGGGGATA	69.4032	70.2515	42.3035	Score: 2.5	PITG_15625	dynein heavy chain (15033 nt) Note(s): At least one base has a quality score < 10
novel138	TTTCATCGTGATGGGGATA	69.4032	70.2515	42.3035	Score: 2.5	PITG_15708	conserved hypothetical protein (1434 nt) Note(s): At least one base has a quality score < 10
novel111	TCTAGTTGTTGCAATAATTCT	0.835176	1.45015	0.534135	Score: 2.5	PITG_15762	conserved hypothetical protein (2256 nt) Note(s): At least one base has a quality score < 10
novel39	ACCAAGGAGTCTGACATG	11.0243	6.84791	3.09798	Score: 2.5	PITG_15843	acyltransferase family (1347 nt) Note(s): At least one base has a quality score < 10
novel13	AACATCTCCAGCCATATTTGA	1.08573	1.04733	0	Score: 1.5	PITG_15844	conserved hypothetical protein (2118 nt)
novel127	TTCAGATGAGAACTTTGA	1.08573	0.725073	0.427308	Score: 2.2	PITG_15853	conserved hypothetical protein (594 nt) Note(s): At least one base has a quality score < 10
stu-miR482a-3p	TTTCCAATTCCACCCATTCCTA	148.4108513	74.03802332	40.59425286	Score: 2.0	PITG_15854	conserved hypothetical protein (1359 nt)
novel138	TTTCATCGTGATGGGGATA	69.4032	70.2515	42.3035	Score: 2.5	PITG_16078	conserved hypothetical protein (3801 nt)
novel21	AAGCTAGAGGTGTCAGAA	1.83739	1.20846	0.961443	Score: 2.5	PITG_16143	conserved hypothetical protein (567 nt) Note(s): At least one base has a quality score < 10
novel93	CTTGGCCTGTAGTAGGTA	10.1056	13.293	5.98231	Score: 2.5	PITG_16271	M96 mating-specific protein family (1581 nt) Note(s): At least one base has a quality score < 10
novel61	ATACCGATTCGATCCGAGC	0	0.725073	0.427308	Score: 2.0	PITG_16477	short-chain specific acyl-CoA dehydrogenase, mitochondrial precursor (1242 nt) Note(s): At least one
novel132	TTGCTTTGTTCTTTGTTCGAG	0.584623	0.8862	0	Score: 2.0	PITG_16809	conserved hypothetical protein (2313 nt)
novel97	GCATCCATGGCTGAATGG	1.08573	0.644509	0.534135	Score: 2.5	PITG_17249	Chloride Channel (ClC) Family (2160 nt) Note(s): At least one base has a quality score < 10
novel89	ATTTTCCTTGGGATTAGTATG	1.25276	0.644509	0.427308	Score: 2.5	PITG_17252	protein kinase, putative (1764 nt) Note(s): At least one base has a quality score < 10
novel93	CTTGGCCTGTAGTAGGTA	10.1056	13.293	5.98231	Score: 2.5	PITG_17302	multicopper oxidase, putative (1743 nt) Note(s): At least one base has a quality score < 10
stu-miR482d-3p	TCTTGCCTACACCGCCCATGCC	52.53259735	41.97367807	10.89635208	Score: 2.5	PITG_17787	Arsenite-Antimonite (ArsAB) Efflux Family (1135 nt)
novel39	ACCAAGGAGTCTGACATG	11.0243	6.84791	3.09798	Score: 2.5	PITG_17872	conserved hypothetical protein (1362 nt)
novel97	GCATCCATGGCTGAATGG	1.08573	0.644509	0.534135	Score: 2.0	PITG_18007	CDP-alcohol phosphatidyltransferase, putative (1224 nt)
novel46	ACTGACAGAAGAGAGTGAGC	9.01991	3.46424	1.38875	Score: 2.5	PITG_18025	fatty acid synthase subunit alpha, putative (12372 nt) Note(s): At least one base has a quality score
miR156	TGACAGAAGAGAGTGAGCAC	0.918694	0.805637	0.320481	Score: 2.2	PITG_18025	fatty acid synthase subunit alpha, putative (12372 nt) Note(s): At least one base has a quality score
novel132	TTGCTTTGTTCTTTGTTCGAG	0.584623	0.8862	0	Score: 2.0	PITG_18088	conserved hypothetical protein (1239 nt) Note(s): At least one base has a quality score < 10
novel119	TGTCGCAGATGACTTTCGCCC	264.5	134.38	41.1284	Score: 2.2	PITG_18452	thioredoxin reductase 1 (2571 nt) Note(s): At least one base has a quality score < 10
novel99	GGGCTATTAGCTCAGTGG	1.33628	1.45015	0.640962	Score: 2.2	PITG_18461	conserved hypothetical protein (1449 nt)
stu-miR6149-5p	TTGCAACACACCTGAATCGTC	175.9716735	121.9734138	56.51147306	Score: 2.2	PITG_18623	polycomb protein, putative (1447 nt)
novel138	TTTCATCGTGATGGGGATA	69.4032	70.2515	42.3035	Score: 2.5	PITG_18706	acetyl-CoA carboxylase, putative (6981 nt) Note(s): At least one base has a quality score < 10
stu-miR171b-3p	TTGAGCCGCGTCAATATCTCT	2.422011643	1.691837312	0.640961887	Score: 2.2	PITG_19072	conserved hypothetical protein (409 nt)
stu-miR6026-3p	TTCTTGGCTAGAGTTGTATTGC	29.48172793	20.46317511	8.332504534	Score: 2.5	PITG_19097	conserved hypothetical protein (3974 nt)
stu-miR530	TCTGCATTTGCACCTGCACCT	1.419799928	0.241691045	0	Score: 2.2	PITG_19098	conserved hypothetical protein (930 nt)
novel135	TTGGTTGAGTGAGCATCTAAG	430.533	360.684	97.3194	Score: 2.2	PITG_19418	conserved hypothetical protein (2031 nt) Note(s): At least one base has a quality score < 10
novel21	AAGCTAGAGGTGTCAGAA	1.83739	1.20846	0.961443	Score: 2.5	PITG_19507	Crinkler (CRN) family protein (2541 nt) Note(s): At least one base has a quality score < 10
novel21	AAGCTAGAGGTGTCAGAA	1.83739	1.20846	0.961443	Score: 2.5	PITG_19509	Crinkler (CRN) family protein (2526 nt) Note(s): At least one base has a quality score < 10
novel21	AAGCTAGAGGTGTCAGAA	1.83739	1.20846	0.961443	Score: 2.5	PITG_20103	mitogen-activated protein kinase, putative (3906 nt) Note(s): At least one base has a quality score <
stu-miR6024-3p	TTTTAGCAAGAGTTGTTTTCCC	48.69078578	22.2355761	10.2553902	Score: 2.5	PITG_20115	adenylate kinase, putative (1616 nt)
novel131	TTGAGCCGCGCCAATATCACG	3.17367	1.85296	0.747789	Score: 2.5	PITG_20377	tRNA pseudouridine synthase (1413 nt) Note(s): At least one base has a quality score < 10
novel93	CTTGGCCTGTAGTAGGTA	10.1056	13.293	5.98231	Score: 2.5	PITG_20496	conserved hypothetical protein (3195 nt) Note(s): At least one base has a quality score < 10
novel21	AAGCTAGAGGTGTCAGAA	1.83739	1.20846	0.961443	Score: 2.5	PITG_20601	conserved hypothetical protein (1317 nt)
stu-miR4376-5p	TACGCAGGAGAGATGATGCTG	64.64265557	35.28689251	14.52846944	Score: 2.5	PITG_20634	conserved hypothetical protein (1443 nt)
miR394	TTGGCATTCTGTCCACCTCC	94.9596	29.6474	11.2168	Score: 2.5	PITG_20983	fibronectin type III domain-containing protein (3528 nt) Note(s): At least one base has a quality sco
miR394	TTGGCATTCTGTCCACCTCC	94.9596	29.6474	11.2168	Score: 2.5	PITG_20985	fibronectin type III domain-containing protein (4035 nt) Note(s): At least one base has a quality sco
miR394	TTGGCATTCTGTCCACCTCC	94.9596	29.6474	11.2168	Score: 2.5	PITG_20986	fibronectin type III domain-containing protein (3867 nt) Note(s): At least one base has a quality sco
miR394	TTGGCATTCTGTCCACCTCC	94.9596	29.6474	11.2168	Score: 2.5	PITG_20990	conserved hypothetical protein (855 nt)
stu-miR7122-3p	ACAGCGTTTCTCTGTATAACC	1.252764643	0.322254726	0.320480944	Score: 2.0	PITG_21014	conserved hypothetical protein (2481 nt)
novel93	CTTGGCCTGTAGTAGGTA	10.1056	13.293	5.98231	Score: 2.5	PITG_21144	conserved hypothetical protein (2517 nt) Note(s): At least one base has a quality score < 10
miR396	TTCCACAGCTTTCTTGAACTG	226.416	115.609	47.2175	Score: 2.5	PITG_21598	conserved hypothetical protein (1731 nt) Note(s): At least one base has a quality score < 10
novel138	TTTCATCGTGATGGGGATA	69.4032	70.2515	42.3035	Score: 1.8	PITG_21853	transmembrane protein, putative (1488 nt) Note(s): At least one base has a quality score < 10
novel93	CTTGGCCTGTAGTAGGTA	10.1056	13.293	5.98231	Score: 2.0	PITG_22552	hypothetical protein (810 nt) Note(s): At least one base has a quality score < 10. Missing 3 prime En
novel91	CATTGGACTCTGAATCCA	2.67256	1.69184	0.427308	Score: 2.5	PITG_22904	helitron helicase-like protein (5931 nt) Note(s): At least one base has a quality score < 10
novel100	TAAGAGTTGTAGGTATACGAGT	1.00221	0	0	Score: 2.5	PITG_22924	conserved hypothetical protein (1332 nt) Note(s): At least one base has a quality score < 10
novel132	TTGCTTTGTTCTTTGTTCGAG	0.584623	0.8862	0	Score: 2.5	PITG_23058	conserved hypothetical protein (2172 nt)

## Sheet: P.i sRNA
NO.	reads	24h	36h	48h
P.isRNA00	TCTGTAAGTCGTGTAGGTTCTGC	3	3	23
P.isRNA01	GATAGAGTGGGATTTGAACCC	1	26	29
P.isRNA02	AGCTAGAGACGGATTTGAACCG	0	5	8
