# Supplementary material for: Identification of miRNAs Involving Potato-Phytophthora infestans Interaction
Source: Plants (Basel). 2023 Jan 19;12(3):461. doi: 10.3390/plants12030461 (PMC9921761; doi:10.3390/plants12030461)
Supplement: Supplementary file 1 [file plants-12-00461-s001.zip › Table S4 Disease lesion phenotypes on leaves transient expressing miRNAs.xlsx]

## Sheet: Sheet1
sRNA	predicted targets in potato or P.infestans	Disease phenotype
7 Mix	Potato R gene	increase
miR159	potato	NO
miR162b-3p	both	NO
miR166	both	increase
miR1919-5p	both	NO
miR394	both	decrease
miR396	both	increase
miR398	potato	NO
miR4376-5p	both	NO
miR6149-5p	both	increase
novel1	both	NO
novel133	P.infestans	increase
novel135	135	NO
novel138	both	NO
novel140	P.infestans	increase
novel72	P.infestans	NO
novel93	both	NO
