# Supplementary material for: Identification of miRNAs Involving Potato-Phytophthora infestans Interaction
Source: Plants (Basel). 2023 Jan 19;12(3):461. doi: 10.3390/plants12030461 (PMC9921761; doi:10.3390/plants12030461)
Supplement: Supplementary file 1 [file plants-12-00461-s001.zip › Table S5 Primers used in this study.xlsx]

## Sheet: transient expression vector 
7 sRNA tandem vector primers		Vector（pk7LIC1.0）	Function
miR482	primer1	aagagcttggcggcgaatCACCACCGTCACAGCCAAATACACAGAGTCCCTGT	transient expression
	primer2	GTGTGTGGTCAGAAGTGAAGGTATGGGAGGAGTAGGAAAGAGAACAGGGACTCTGTGT
	primer3	TCACTTCTGACCACACACAAGTATTATATATACAGTCTCTACTTTA
	primer4	ATACAGTCTCTACTTTAAGGTATGGAGGAGTAGGACAGAGATCAGTACTCTGTGTAACA
	primer5	attcgccgccaagctcttGGGTAGAATGTTTGCGGTTTGTGTTACACAGAGTACTGA
miR482a-3p	primer1	aagagcttggcggcgaatCACCCTACTCAAAACCCATATGAGTCGTACCCTGT
	primer2	GTGTGTGGTCACAAGTGAATAGGAATGGGTGGAATTGGAAAGAACAGGGTACGACTCA
	primer3	TCACTTGTGACCACACACAAGTATTAAAAATACAGTCTCTACTTTA
	primer4	ATACAGTCTCTACTTTAATAGGAATGGTGGAATTGAAAAGATCAGTTACGACTCATCAA
	primer5	attcgccgccaagctcttTTGTTCTTACTTTCTAGTTTATTGATGAGTCGTAACTGA
miR482e-3p	primer1	aagagcttggcggcgaatCACCACACCCACAAACTACTCGGCACAGAATGACGAT
	primer2	ATTTCGTGAGTTTTGGTTAGGAATGGGCGGTATTGGCAAGAGAATCGTCATTCTGTGC
	primer3	AACCAAAACTCACGAAATCCGTCTACAGTTCTTATT
	primer4	CGTCTACAGTTCTTATTAGGAATGGCGGTATTGGCCAGAGAATCTCCTCTTGTGCCAAA
	primer5	attcgccgccaagctcttTGATTAGTTGGGATTGATGGTTTGGCACAAGAGGAGAT
miR5300	primer1	agttccagggcgcccCACCAAACAAAACCTCACAATGAGAGAGTCCCTGT
	primer2	GTGTGTGGTCAGGTAAGAAGTTGGAATGCCTGGACTGGGGAGAACAGGGACTCTCTCA
	primer3	TCTTACCTGACCACACACGTAGATATACATTATTCTCTCATGATTA
	primer4	TTATTCTCTCATGATTAAGTTGGAAGCCTGGACTGAGGAGATCAGTACTCTCTCGTCAA
	primer5	attcgccgccaagctcttATGTGTGATTACTTACTTTGGTTGACGAGAGAGTACTGA
miR482d-3p	primer1	aagagcttggcggcgaatCACCAAACCTCCACCAACAATGGGTGAGATTCTCCAT
	primer2	ATTTCGTGTTTGTTGGTTAGGCATGGGCGGTGTAGGCAAGAGAATGGAGAATCTCACC
	primer3	AACCAACAAACACGAAATCCGTCACATTTGCTTATT
	primer4	CGTCACATTTGCTTATTAGGCATGGCGGTGTAGGCCAGAGAATGAGCACTTCACCCCAA
	primer5	attcgccgccaagctcttAGTTCTGTTGGGTAATGGTATTGGGGTGAAGTGCTCAT
miR6024-3p	primer1	aagagcttggcggcgaatCACCAACCTGAACTAAACACAGGGTGGACATCCTCAT
	primer2	TTAGGACGTTTGTTGGTTAGGGAAAACAACTCTTGCTAAAAGAATGAGGATGTCCACC
	primer3	AACCAACAAACGTCCTAACGACCTCATTTGCTTATT
	primer4	GACCTCATTTGCTTATTAGGGAAAAAACTCTTGCTCAAAGAATAGGCTCTTCACCCAAA
	primer5	attcgccgccaagctcttGTGGTTAATGGTTTTGTTGATTTGGGTGAAGAGCCTAT
miR6027	primer1	aagagcttggcggcgaatCACCAACCTGAACTAAACACAAGAGAAACGCAAAGAA
	primer2	TATGCAAATTGCCTTTGTATTATGGATAGCCGAAGGATTCAGATTCTTTGCGTTTCTC
	primer3	ACAAAGGCAATTTGCATATCATTGCACTTGCTTCTCTTGC
	primer4	GCACTTGCTTCTCTTGCATTATGGAAGCCGAAGGACTCAGATTCCGGTGCTGATCTCTT
	primer5	atcgacccgacgcccGTGGTTAATGGTTTTGTTGAAAGAGATCAGCACCGGAA
control sRNA	primer1	aagagcttggcggcgaatCACCAAACAAAACCTCACAATGAGAGAGTCCCTGT
	primer2	GTGTGTGGTCAGGTAAGAAAGAGCTGATAGCGCGTGACAAGAACAGGGACTCTCTCA
	primer3	TCTTACCTGACCACACACGTAGATATACATTATTCTCTCATGATTA
	primer4	TTATTCTCTCATGATTAAAGAGCTGATCGCGCGTGCCAAGATCAGTACTCTCTCGTCAA
	primer5	atcgacccgacgcccATGTGTGATTACTTACTTTGGTTGACGAGAGAGTACTGA
Single sRNA vector primers（common primer1/3/5） Vector（pk7LIC1.0）			Function
miR159	primer1	agttccagggcgcccCACCAAACCTCCACCAACAATGGGTGAGATTCTCCAT	transient expression
	primer2	ATTTCGTGTTTGTTGGTTATAGAGCTCCCTTCAATCCAAAGAATGGAGAATCTCACC
	primer3	AACCAACAAACACGAAATCCGTCACATTTGCTTATT
	primer4	CGTCACATTTGCTTATTATAGAGCTCCATTCAATCAAAAGAATGAGCACTTCACCCCAA
	primer5	attcgccgccaagctcttAGTTCTGTTGGGTAATGGTATTGGGGTGAAGTGCTCAT
miR166	primer2	ATTTCGTGTTTGTTGGTTAGGGGAATGAAGCCTGGTCCGAGAATGGAGAATCTCACC	transient expression
	primer4	CGTCACATTTGCTTATTAGGGGAATGACGCCTGGTACGAGAATGAGCACTTCACCCCAA
stu-miR1919-5p	primer2	ATTTCGTGTTTGTTGGTTAGGGCGAAAGTCATCTGCGACAGAATGGAGAATCTCACC	transient expression
	primer4	CGTCACATTTGCTTATTAGGGCGAAAGCCATCTGCAACAGAATGAGCACTTCACCCCAA
miR396	primer2	ATTTCGTGTTTGTTGGTTACAGTTCAAGAAAGCTGTGGAAGAATGGAGAATCTCACC	transient expression
	primer4	CGTCACATTTGCTTATTACAGTTCAAGCAAGCTGTAGAAGAATGAGCACTTCACCCCAA
miR162b-3p	primer2	ATTTCGTGTTTGTTGGTTACTGGATGCAGAGGTTTATCGAGAATGGAGAATCTCACC	transient expression
	primer4	CGTCACATTTGCTTATTACTGGATGCAAAGGTTTACCGAGAATGAGCACTTCACCCCAA
miR6149-5p	primer2	ATTTCGTGTTTGTTGGTTAGACGATTCAGGTGTGTTGCAAGAATGGAGAATCTCACC	transient expression
	primer4	CGTCACATTTGCTTATTAGACGATTCAAGTGTGTTACAAGAATGAGCACTTCACCCCAA
novel 135	primer2	ATTTCGTGTTTGTTGGTTACTTAGATGCTCACTCAACCAAGAATGGAGAATCTCACC	transient expression
	primer4	CGTCACATTTGCTTATTACTTAGATGCCCACTCAAACAAGAATGAGCACTTCACCCCAA
novel 1	primer2	ATTTCGTGTTTGTTGGTTAGCTCTCCCACAACCCCGTTTTGAATGGAGAATCTCACC	transient expression
	primer4	CGTCACATTTGCTTATTAGCTCTCCCAAAACCCCGCTTTGAATGAGCACTTCACCCCAA
miR394	primer2	ATTTCGTGTTTGTTGGTTGGAGGTGGACAGAATGCCAAGAATGGAGAATCTCACCCAT	transient expression
	primer4	CGTCACATTTGCTTATTGGAGGTGGAGCAGTAATGCCAAGAATGAGCACTTCACCCCA
miR4376-5p	primer2	ATTTCGTGTTTGTTGGTTACAGCATCATCTCTCCTGCGTAGAATGGAGAATCTCACC	transient expression
	primer4	CGTCACATTTGCTTATTACAGCATCATATCTCCTGAGTAGAATGAGCACTTCACCCCAA
novel 93	primer2	ATTTCGTGTTTGTTGGTTACAGATACCTACTACAGGCCAAGGAATGGAGAATCTCACC	transient expression
	primer4	CGTCACATTTGCTTATTACAGATACTACTACAGGCAAAGGAATGAGCACTTCACCCCAA
novel 138	primer2	ATTTCGTGTTTGTTGGTTATCTATCCCCATCACGATGAAAGAATGGAGAATCTCACC	transient expression
	primer4	CGTCACATTTGCTTATTATCTATCCCCCTCACGATAAAAGAATGAGCACTTCACCCCAA
novel 72	primer2	ATTTCGTGTTTGTTGGTTAAATTATAATTCGGTCACGTCATGAATGGAGAATCTCACC	transient expression
	primer4	CGTCACATTTGCTTATTAAATTATATTCGGTCACGCCATGAATGAGCACTTCACCCCAA
miR398	primer2	ATTTCGTGTTTGTTGGTTACAGGGGCGACCTGAGAACACAGAATGGAGAATCTCACC	transient expression
	primer4	CGTCACATTTGCTTATTACAGGGGCGAACTGAGAAAACAGAATGAGCACTTCACCCCAA
novel 133	primer2	ATTTCGTGTTTGTTGGTTATTTCTACAAAAATCGCTGCCAAGAATGGAGAATCTCACC	transient expression
	primer4	CGTCACATTTGCTTATTATTTCTACAAAATCGCTGACAAGAATGAGCACTTCACCCCAA
novel 140	primer2	ATTTCGTGTTTGTTGGTTACCGGCATACCAGTGATCGAAAGAATGGAGAATCTCACC	transient expression
	primer4	CGTCACATTTGCTTATTACCGGCATACAAGTGATCAAAAGAATGAGCACTTCACCCCAA

## Sheet: amiRNA vector
amiRNAs vectors primers		Vector	Function
PMS4-miR394-PITG-F	TcgagTCTCGGTCTTCCATCAGCTGCCTGt	pMS4	amiRNA
PMS4-miR394-PITG-R	CtagaCAGGCAGCTGATGGAAGACCGAGAc
PMS4-miR394-DMG34305-F	TcgagAAGGAGGTTGACAGAATGCCAAACt	pMS4	amiRNA
PMS4-miR394-DMG34305-R	CtagaGTTTGGCATTCTGTCAACCTCCTTc
PMS4-miR396-DMG26899-F	tcgagGGACTTCAAGAAAGTTGTAGAATTt	pMS4	amiRNA
PMS4-miR396-DMG26899-R	ctagaAATTCTACAACTTTCTTGAAGTCCc
PMS4-miR6149-5p-DMG21641-F	tcgagTGCGATTCAAATGTGTTGCAAAATt	pMS4	amiRNA
PMS4-miR6149-5p-DMG21641-R	ctagaATTTTGCAACACATTTGAATCGCAc
PMS4-tarMIX-DMG27407-F	TcgagAGGAATGGGGGGTGTTGGCAAGACt	pMS4	amiRNA
PMS4-tarMIX-DMG27407-R	CtagaGTCTTGCCAACACCCCCCATTCCTc
Detection primers of STTM vector
sRNA-S35	CACTGACGTAAGGGATGACGCA
sRNA-terminater	GGATCTGAGCTACACATGCTCAGGT
